# Supplementary material for: A thorough investigation of photo-catalytic degradation of ortho and para-nitro phenols in binary mixtures: new insights into evaluating degradation progress using chemometrics approaches
Source: Royal Society of Chemistry journal article supplement (doi:10.1039/d1nj02153b), 2021-01-01
Supplement: d1nj02153b1.pdf [file d1nj02153b1.pdf]

## Electronic Supplementary Material

### New Journal of Chemistry

# **A Thorough Investigation of Photo-catalytic Degradation of ortho and para-Nitro Phenols in binary mixtures: New Insights into Evaluating Degradations Progress Using Chemometrics Approaches**

S. Maryam Sajjadi<sup>\*a</sup>, Zeinab Asadollah-pour<sup>a</sup>, S. Hashem Sajjadi<sup>b</sup>, S. Nasrin Nabavi<sup>a</sup>, Zahra Abed<sup>a</sup>, Faezeh Farzin<sup>a</sup>, Atefeh Emadi<sup>a</sup>, Behnaz Abdous<sup>a</sup>

<sup>a</sup>*Faculty of Chemistry, Semnan University, Semnan, Iran.*

<sup>b</sup>*École Polytechnique Federale de Lausanne (EPFL), CH-1015, Lausanne, Switzerland*

---

\*Correspondence to: S. Maryam Sajjadi: E-mail: [sajjadi@semnan.ac.ir](mailto:sajjadi@semnan.ac.ir)

Tel. (+98) 23 – 31532822 , Fax: (+98) 23 33384110.

**Table 1S.** Experimental conditions for  $2^{5-1}$  central composite design and experimental responses for the analytes in acidic condition

| Independent variables                        |  | Levels    |       |       |       |           |
|----------------------------------------------|--|-----------|-------|-------|-------|-----------|
|                                              |  | $-\alpha$ | -1    | 0     | 1     | $+\alpha$ |
| A (Catalyst dosage(g))                       |  | 0.002     | 0.003 | 0.003 | 0.004 | 0.005     |
| B (H <sub>2</sub> O <sub>2</sub> volume(mL)) |  | 0.1       | 0.2   | 0.2   | 0.3   | 0.4       |
| C (2-NP concentration)                       |  | 3         | 19    | 25    | 30    | 38        |
| D (4-NP concentration)                       |  | 2         | 8     | 10    | 13    | 19        |
| E (Temperature(°C))                          |  | 15.0      | 22.9  | 32.5  | 42.1  | 50.0      |

  

| Factor |       | Standard deviation of Profiles |    |    |       |         |         |         |         |
|--------|-------|--------------------------------|----|----|-------|---------|---------|---------|---------|
| Run    | A     | B                              | C  | D  | E     | YA-2-NP | YB-2-NP | YA-2-NP | YB-4-NP |
| 1      | 0.003 | 0.2                            | 25 | 2  | 32.5  | 9.514   | 1.698   | 0.8873  | 0       |
| 2      | 0.004 | 0.3                            | 15 | 5  | 42.1  | 6.456   | 1.148   | 2.114   | 0.3177  |
| 3      | 0.003 | 0.2                            | 22 | 13 | 32.5  | 5.911   | 1.518   | 5.194   | 2.65    |
| 4      | 0.003 | 0.4                            | 19 | 8  | 32.5  | 6.302   | 2.114   | 3.483   | 0.3537  |
| 5      | 0.003 | 0.2                            | 38 | 8  | 32.5  | 10.56   | 2.975   | 2.932   | 2.306   |
| 6      | 0.002 | 0.3                            | 30 | 5  | 42.11 | 11.42   | 2.303   | 2.281   | 1.237   |
| 7      | 0.002 | 0.1                            | 34 | 10 | 23.5  | 7.84    | 1.966   | 1.901   | 0.7429  |
| 8      | 0.002 | 0.1                            | 30 | 10 | 42.11 | 11.33   | 1.698   | 3.707   | 2.513   |
| 9      | 0.003 | 0.2                            | 25 | 5  | 15    | 11.29   | 0.3383  | 2.304   | 1.351   |
| 10     | 0.003 | 0.2                            | 22 | 8  | 32.5  | 8.242   | 1.616   | 3.957   | 2.3     |
| 11     | 0.002 | 0.3                            | 25 | 10 | 42.11 | 8.641   | 2.242   | 4.579   | 2.363   |
| 12     | 0.004 | 0.3                            | 30 | 5  | 22.89 | 10.75   | 2.778   | 2.243   | 1.215   |
| 13     | 0.004 | 0.3                            | 15 | 10 | 22.89 | 4.932   | 1.211   | 4.064   | 0.9863  |
| 14     | 0.003 | 0.2                            | 22 | 8  | 50    | 8.417   | 1.092   | 3.754   | 2.382   |
| 15     | 0.005 | 0.2                            | 30 | 8  | 32.5  | 11.54   | 1.211   | 3.835   | 2.219   |
| 16     | 0.003 | 0.2                            | 22 | 8  | 32.5  | 7.433   | 1.411   | 3.438   | 1.515   |
| 17     | 0.004 | 0.1                            | 25 | 5  | 42.11 | 11.29   | 0.3379  | 2.306   | 1.356   |
| 18     | 0.002 | 0.3                            | 22 | 10 | 22.89 | 4.901   | 2.728   | 3.484   | 1.5     |
| 19     | 0.003 | 0.2                            | 3  | 8  | 32.5  | 0.7608  | 0.3483  | 3.461   | 0.6933  |
| 20     | 0.004 | 0.1                            | 25 | 10 | 42.11 | 7.754   | 1.79    | 3.711   | 2.868   |
| 21     | 0.002 | 0.1                            | 15 | 5  | 32.1  | 5.369   | 0.9624  | 2.226   | 0.7142  |
| 22     | 0.003 | 0.2                            | 15 | 0  | 32.5  | 4.765   | 1.593   | 0       | 0       |
| 23     | 0.003 | 0.2                            | 0  | 19 | 32.5  | 0       | 0       | 6.71    | 2.223   |

**Table 2S.** The results of SVD analysis on the data of individual nitrophenols

| Data<br>SV* | S <sub>a-2NP</sub> | S <sub>a-4NP</sub> | S <sub>b-2NP</sub> | S <sub>b-4NP</sub> |
|-------------|--------------------|--------------------|--------------------|--------------------|
| 1           | <b>14.09</b>       | <b>17.76</b>       | <b>14.54</b>       | <b>45.79</b>       |
| 2           | <b>3.15</b>        | <b>6.86</b>        | <b>2.30</b>        | <b>11.66</b>       |
| 3           | <b>0.47</b>        | <b>0.47</b>        | <b>0.42</b>        | <b>0.94</b>        |
| 4           | 0.13               | 0.26               | 0.15               | 0.30               |
| 5           | 0.09               | 0.12               | 0.02               | 0.19               |

\*SV is the abbreviation of singular value.

**Table 3S.** Analysis of variance (ANOVA) for central composite design for 2-NP-A at acidic condition

| Source         | Sum of Squares | df | Mean Square | F Value | p-value<br>Prob > F |
|----------------|----------------|----|-------------|---------|---------------------|
| Model          | 224            | 10 | 22.4        | 27.66   | < 0.0001            |
| C              | 6.964          | 1  | 6.964       | 8.598   | 0.01255             |
| D              | 18.89          | 1  | 18.89       | 23.32   | 0.000412            |
| E              | 8.945          | 1  | 8.945       | 11.05   | 0.006071            |
| AE             | 1.381          | 1  | 1.381       | 1.705   | 0.2161              |
| BC             | 3.757          | 1  | 3.757       | 4.639   | 0.05228             |
| CD             | 18.48          | 1  | 18.48       | 22.82   | 0.000451            |
| DE             | 5.211          | 1  | 5.211       | 6.434   | 0.02611             |
| A <sup>2</sup> | 3.099          | 1  | 3.099       | 3.827   | 0.07413             |
| C <sup>2</sup> | 5.341          | 1  | 5.341       | 6.595   | 0.02463             |
| D <sup>2</sup> | 5.223          | 1  | 5.223       | 6.449   | 0.02597             |
| Residual       | 9.719          | 12 | 0.8099      |         |                     |
| Lack of Fit    | 9.391          | 11 | 0.8537      | 2.606   | 0.4518              |
| Pure Error     | 0.3276         | 1  | 0.3276      |         |                     |
| Cor Total      | 233.7          | 22 |             |         |                     |

**Table 4S.** Analysis of variance (ANOVA) for central composite design for 2-NP-B at acidic condition

| Source         | Sum of Squares | df | Mean Square | F Value | p-value<br>Prob > F |
|----------------|----------------|----|-------------|---------|---------------------|
| Model          | 13.9           | 13 | 1.069       | 23.68   | < 0.0001            |
| B              | 3.078          | 1  | 3.078       | 68.15   | < 0.0001            |
| C              | 5.216          | 1  | 5.216       | 115.5   | < 0.0001            |
| E              | 0.8243         | 1  | 0.8243      | 18.25   | 0.002075            |
| AB             | 0.2519         | 1  | 0.2519      | 5.577   | 0.04249             |
| AC             | 1.123          | 1  | 1.123       | 24.85   | 0.000754            |
| AD             | 2.387          | 1  | 2.387       | 52.84   | < 0.0001            |
| BD             | 0.2012         | 1  | 0.2012      | 4.454   | 0.06403             |
| BE             | 2.827          | 1  | 2.827       | 62.58   | < 0.0001            |
| CE             | 2.279          | 1  | 2.279       | 50.45   | < 0.0001            |
| DE             | 0.424          | 1  | 0.424       | 9.388   | 0.01348             |
| A <sup>2</sup> | 0.7599         | 1  | 0.7599      | 16.82   | 0.00267             |
| B <sup>2</sup> | 0.745          | 1  | 0.745       | 16.49   | 0.002836            |
| E <sup>2</sup> | 2.891          | 1  | 2.891       | 64      | < 0.0001            |
| Residual       | 0.4065         | 9  | 0.04517     |         |                     |
| Lack of Fit    | 0.3855         | 8  | 0.04819     | 2.293   | 0.4725              |
| Pure Error     | 0.02102        | 1  | 0.02102     |         |                     |
| Cor Total      | 14.31          | 22 |             |         |                     |

**Table 5S.** Analysis of variance (ANOVA) for central composite design for 4-NP-A at acidic condition

| Source         | Sum of Squares | df | Mean Square | F Value | p-value<br>Prob > F |
|----------------|----------------|----|-------------|---------|---------------------|
| Model          | 43.56          | 11 | 3.96        | 167.3   | < 0.0001            |
| D              | 20.45          | 1  | 20.45       | 864     | < 0.0001            |
| AB             | 0.2753         | 1  | 0.2753      | 11.63   | 0.005825            |
| AC             | 1.156          | 1  | 1.156       | 48.84   | < 0.0001            |
| AD             | 1.101          | 1  | 1.101       | 46.5    | < 0.0001            |
| BC             | 0.4451         | 1  | 0.4451      | 18.8    | 0.001182            |
| BE             | 1.034          | 1  | 1.034       | 43.67   | < 0.0001            |
| CE             | 2.118          | 1  | 2.118       | 89.48   | < 0.0001            |
| A <sup>2</sup> | 0.7488         | 1  | 0.7488      | 31.63   | 0.000155            |
| C <sup>2</sup> | 0.2432         | 1  | 0.2432      | 10.27   | 0.008378            |
| D <sup>2</sup> | 0.6543         | 1  | 0.6543      | 27.64   | 0.000269            |
| E <sup>2</sup> | 0.2625         | 1  | 0.2625      | 11.09   | 0.006708            |
| Residual       | 0.2604         | 11 | 0.02367     |         |                     |
| Lack of Fit    | 0.126          | 10 | 0.0126      | 0.09378 | 0.9915              |
| Pure Error     | 0.1344         | 1  | 0.1344      |         |                     |
| Cor Total      | 43.82          | 22 |             |         |                     |

**Table 6S.** Analysis of variance (ANOVA) for central composite design for 4-NP-B at acidic condition

| <b>Source</b>  | <b>Sum of Squares</b> | <b>df</b> | <b>Mean Square</b> | <b>F Value</b> | <b>p-value Prob &gt; F</b> |
|----------------|-----------------------|-----------|--------------------|----------------|----------------------------|
| Model          | 16.56                 | 10        | 1.656              | 19.93          | < 0.0001                   |
| B              | 0.8916                | 1         | 0.8916             | 10.73          | 0.006635                   |
| C              | 2.425                 | 1         | 2.425              | 29.18          | 0.00016                    |
| D              | 7.33                  | 1         | 7.33               | 88.21          | < 0.0001                   |
| E              | 1.18                  | 1         | 1.18               | 14.2           | 0.002679                   |
| AB             | 0.2937                | 1         | 0.2937             | 3.535          | 0.08458                    |
| BC             | 0.3473                | 1         | 0.3473             | 4.179          | 0.06351                    |
| BE             | 0.3936                | 1         | 0.3936             | 4.736          | 0.05023                    |
| CD             | 0.4583                | 1         | 0.4583             | 5.515          | 0.03681                    |
| DE             | 0.8533                | 1         | 0.8533             | 10.27          | 0.007569                   |
| B <sup>2</sup> | 0.7431                | 1         | 0.7431             | 8.942          | 0.01127                    |
| Residual       | 0.9972                | 12        | 0.0831             |                |                            |
| Lack of Fit    | 0.6892                | 11        | 0.06265            | 0.2034         | 0.9514                     |
| Pure Error     | 0.308                 | 1         | 0.308              |                |                            |
| Cor Total      | 17.56                 | 22        |                    |                |                            |

**Table 7S.** Analysis of variance (ANOVA) for central composite design for 2-NP-A at basic condition

| <b>Source</b>  | <b>Sum of Squares</b> | <b>df</b> | <b>Mean Square</b> | <b>F Value</b> | <b>p-value Prob &gt; F</b> |
|----------------|-----------------------|-----------|--------------------|----------------|----------------------------|
| Model          | 452.6                 | 6         | 75.43              | 52.69          | < 0.0001                   |
| B              | 11.54                 | 1         | 11.54              | 8.063          | 0.01393                    |
| C              | 328.1                 | 1         | 328.1              | 229.2          | < 0.0001                   |
| D              | 1.941                 | 1         | 1.941              | 1.356          | 0.2652                     |
| E              | 10.57                 | 1         | 10.57              | 7.386          | 0.01759                    |
| CE             | 5.742                 | 1         | 5.742              | 4.011          | 0.06652                    |
| E <sup>2</sup> | 1.758                 | 1         | 1.758              | 1.228          | 0.2878                     |
| Residual       | 18.61                 | 13        | 1.432              |                |                            |
| Lack of Fit    | 12.82                 | 12        | 1.068              | 0.1846         | 0.9618                     |
| Pure Error     | 5.789                 | 1         | 5.789              |                |                            |
| Cor Total      | 471.2                 | 19        |                    |                |                            |

**Table 8S.** Analysis of variance (ANOVA) for central composite design for 2-NP-B at basic condition

| Source      | Sum of Squares | df | Mean Square | F Value | p-value<br>Prob > F |
|-------------|----------------|----|-------------|---------|---------------------|
| Model       | 141            | 12 | 11.75       | 15.83   | 0.000629            |
| A           | 5.238          | 1  | 5.238       | 7.06    | 0.0326              |
| B           | 23.34          | 1  | 23.34       | 31.46   | 0.000808            |
| C           | 32.55          | 1  | 32.55       | 43.87   | 0.000298            |
| D           | 12.65          | 1  | 12.65       | 17.04   | 0.004412            |
| E           | 23.55          | 1  | 23.55       | 31.74   | 0.000788            |
| AB          | 7.688          | 1  | 7.688       | 10.36   | 0.01467             |
| AC          | 3.958          | 1  | 3.958       | 5.334   | 0.05422             |
| AD          | 4.155          | 1  | 4.155       | 5.6     | 0.04987             |
| AE          | 25.69          | 1  | 25.69       | 34.62   | 0.000609            |
| BC          | 1.585          | 1  | 1.585       | 2.136   | 0.1872              |
| BD          | 14.25          | 1  | 14.25       | 19.21   | 0.003224            |
| DE          | 20.06          | 1  | 20.06       | 27.04   | 0.001253            |
| Residual    | 5.194          | 7  | 0.7419      |         |                     |
| Lack of Fit | 3.418          | 6  | 0.5697      | 0.3209  | 0.872               |
| Pure Error  | 1.775          | 1  | 1.775       |         |                     |
| Cor Total   | 146.1          | 19 |             |         |                     |

**Table 9S.** Analysis of variance (ANOVA) for central composite design for 2-NP-C at basic condition

| Source      | Sum of Squares | df | Mean Square | F Value | p-value<br>Prob > F |
|-------------|----------------|----|-------------|---------|---------------------|
| Model       | 557.9          | 8  | 69.74       | 30.66   | < 0.0001            |
| C           | 203.6          | 1  | 203.6       | 89.52   | < 0.0001            |
| E           | 7.271          | 1  | 7.271       | 3.197   | 0.1013              |
| AB          | 45.14          | 1  | 45.14       | 19.85   | 0.000971            |
| AC          | 4.661          | 1  | 4.661       | 2.049   | 0.1801              |
| AE          | 113.9          | 1  | 113.9       | 50.06   | < 0.0001            |
| BE          | 76.38          | 1  | 76.38       | 33.58   | 0.00012             |
| CE          | 16.59          | 1  | 16.59       | 7.294   | 0.02063             |
| DE          | 15.25          | 1  | 15.25       | 6.703   | 0.02518             |
| Residual    | 25.02          | 11 | 2.275       |         |                     |
| Lack of Fit | 12.97          | 10 | 1.297       | 0.1076  | 0.9877              |
| Pure Error  | 12.05          | 1  | 12.05       |         |                     |
| Cor Total   | 582.9          | 19 |             |         |                     |

**Table 10S.** Analysis of variance (ANOVA) for central composite design for 4-NP-A at basic condition

| Source         | Sum of Squares | df | Mean Square | F Value | p-value<br>Prob > F |
|----------------|----------------|----|-------------|---------|---------------------|
| Model          | 26.69          | 3  | 8.897       | 109.5   | < 0.0001            |
| D              | 8.517          | 1  | 8.517       | 104.8   | < 0.0001            |
| DE             | 0.3572         | 1  | 0.3572      | 4.397   | 0.05226             |
| D <sup>2</sup> | 1.474          | 1  | 1.474       | 18.14   | 0.000599            |
| Residual       | 1.3            | 16 | 0.08123     |         |                     |
| Lack of Fit    | 1.297          | 15 | 0.08649     | 36.18   | 0.1298              |
| Pure Error     | 0.002391       | 1  | 0.002391    |         |                     |
| Cor Total      | 27.99          | 19 |             |         |                     |

**Table 11S.** Analysis of variance (ANOVA) for central composite design for 4-NP-B at basic condition

| Source         | Sum of Squares | df | Mean Square | F Value | p-value<br>Prob > F |
|----------------|----------------|----|-------------|---------|---------------------|
| Model          | 11.85          | 9  | 1.316       | 24.99   | < 0.0001            |
| C              | 0.9622         | 1  | 0.9622      | 18.27   | 0.001626            |
| D              | 6.993          | 1  | 6.993       | 132.8   | < 0.0001            |
| E              | 0.1444         | 1  | 0.1444      | 2.742   | 0.1287              |
| AB             | 0.8151         | 1  | 0.8151      | 15.48   | 0.002803            |
| AC             | 1.055          | 1  | 1.055       | 20.02   | 0.001189            |
| BC             | 1.326          | 1  | 1.326       | 25.18   | 0.000524            |
| BE             | 0.312          | 1  | 0.312       | 5.924   | 0.03521             |
| C <sup>2</sup> | 1.198          | 1  | 1.198       | 22.74   | 0.000759            |
| E <sup>2</sup> | 0.1231         | 1  | 0.1231      | 2.336   | 0.1574              |
| Residual       | 0.5267         | 10 | 0.05267     |         |                     |
| Lack of Fit    | 0.4426         | 9  | 0.04918     | 0.5845  | 0.7767              |
| Pure Error     | 0.08414        | 1  | 0.08414     |         |                     |
| Cor Total      | 12.37          | 19 |             |         |                     |

### Equations:

Acidic status: The relationship between the responses and experimental factors in acidic condition is as follows:

$$YA_{2-NP} = 6.114 + 1.310 C - 2.408 D + 1.351 E - 0.4840 AE - 0.8032 BC - 1.709 CD + 1.286 DE + 0.5571 A^2 - 0.5100 C^2 - 0.6589 D^2 \quad \text{Eq. 1S}$$

$$YB_{2-NP} = 1.946 + 0.6367 B + 0.6211 C + 0.6183 E - 0.1837 AB - 0.8600 AC + 1.143 AD + 0.1846 BD - 0.9865 BE - 1.736 CE + 0.4973 DE + 0.4707 A^2 - 0.2004 B^2 - 0.5499 E^2 \quad \text{Eq. 2S}$$

$$YA_{4-NP} = 4.504 + 1.615 D + 0.1785 AB + 0.6915 AC - 0.6415 AD + 0.2288 BC + 0.4611 BE + 1.163 CE - 0.3635 A^2 - 0.1078 C^2 - 0.1748 D^2 + 0.1329 E^2 \quad \text{Eq. 3S}$$

$$YB_{4-NP} = 2.060 - 0.2480 B + 0.6013 C + 0.9481 D + 0.5258 E - 0.1537 AB + 0.2577 BC - 0.1902 BE + 0.1866 CD + 0.5135 DE - 0.1820 B^2 \quad \text{Eq. 4S}$$

**Figures:**

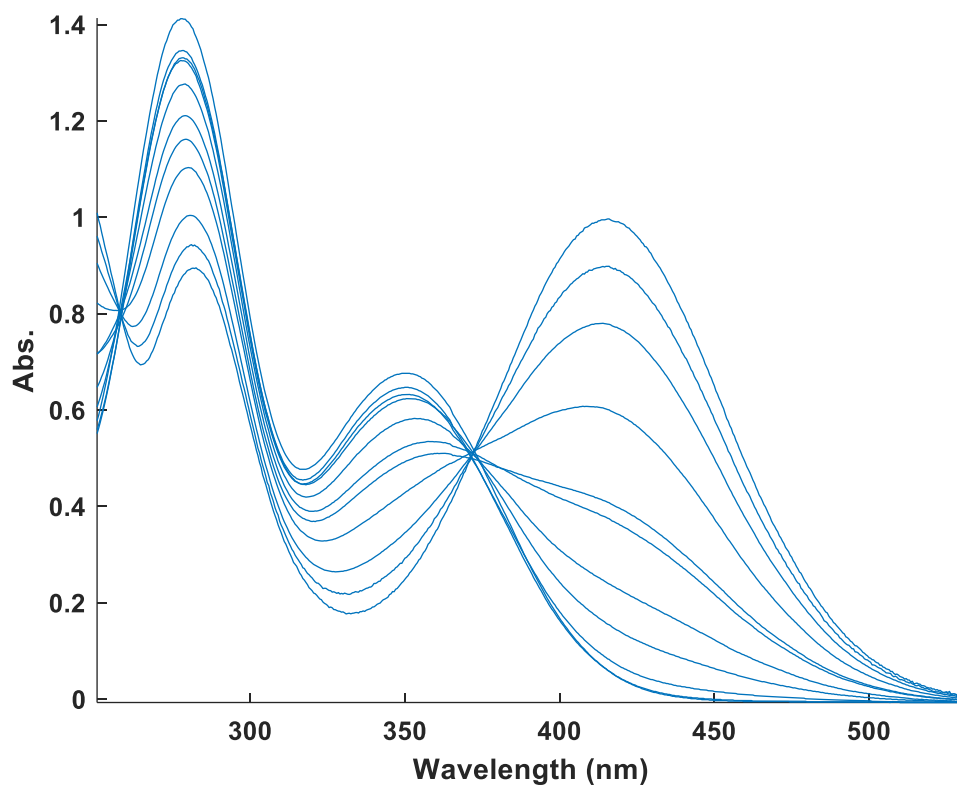

**Fig. S1.** pH titration data of 2-NP

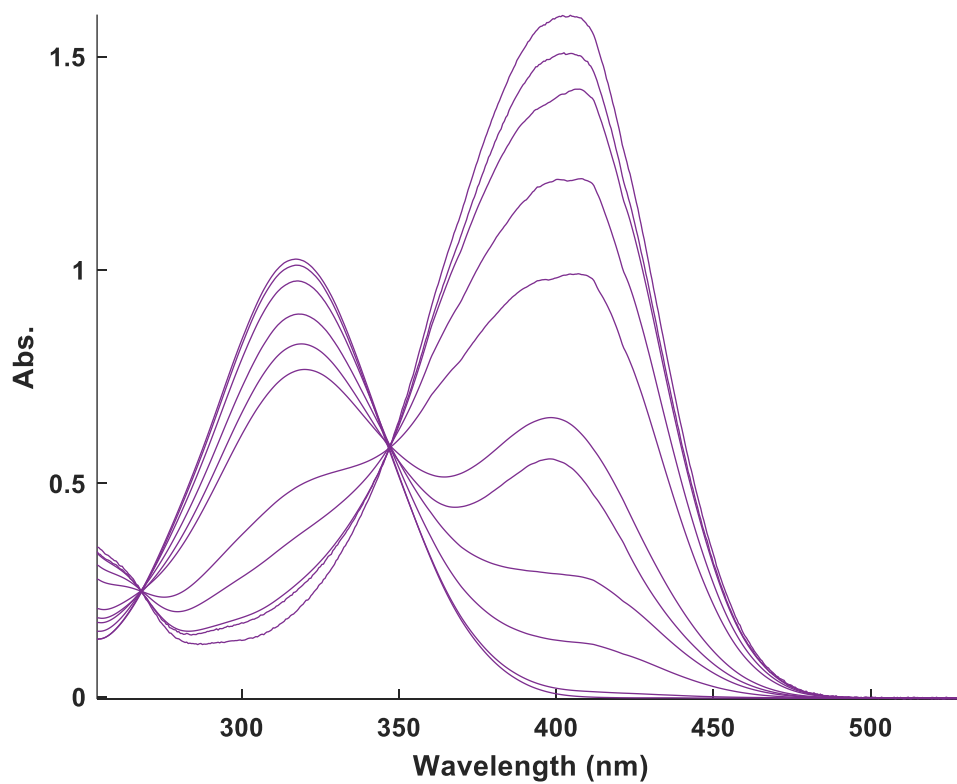



**Fig. S2.** pH titration data of 4-NP

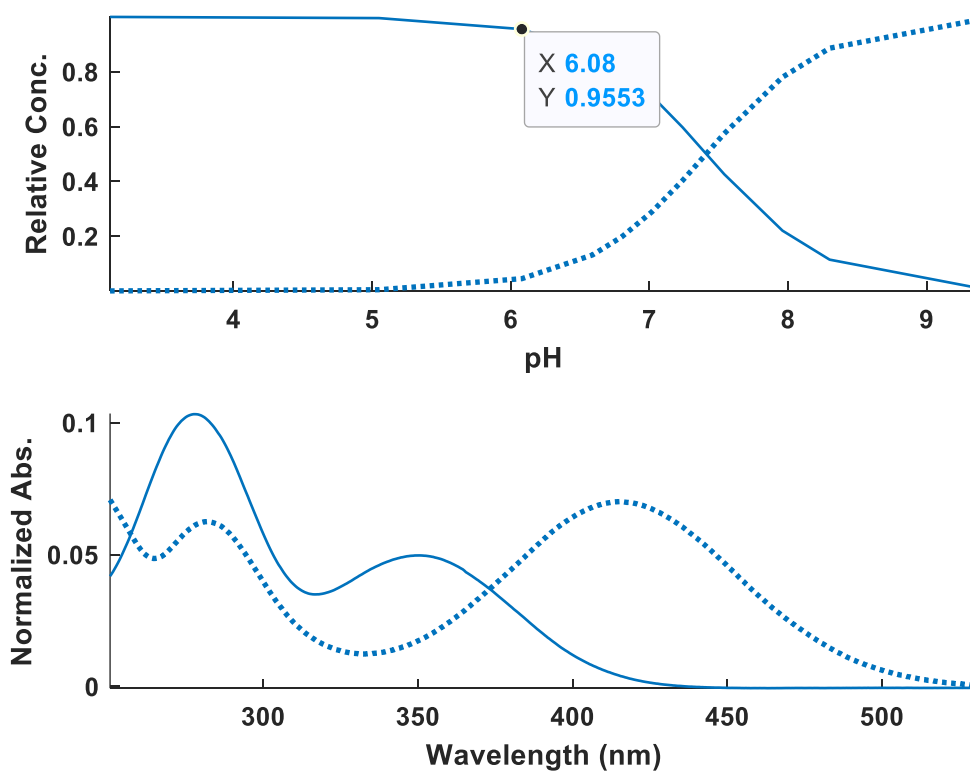

**Fig. S3.** The spectral and pH profiles of 2-NP

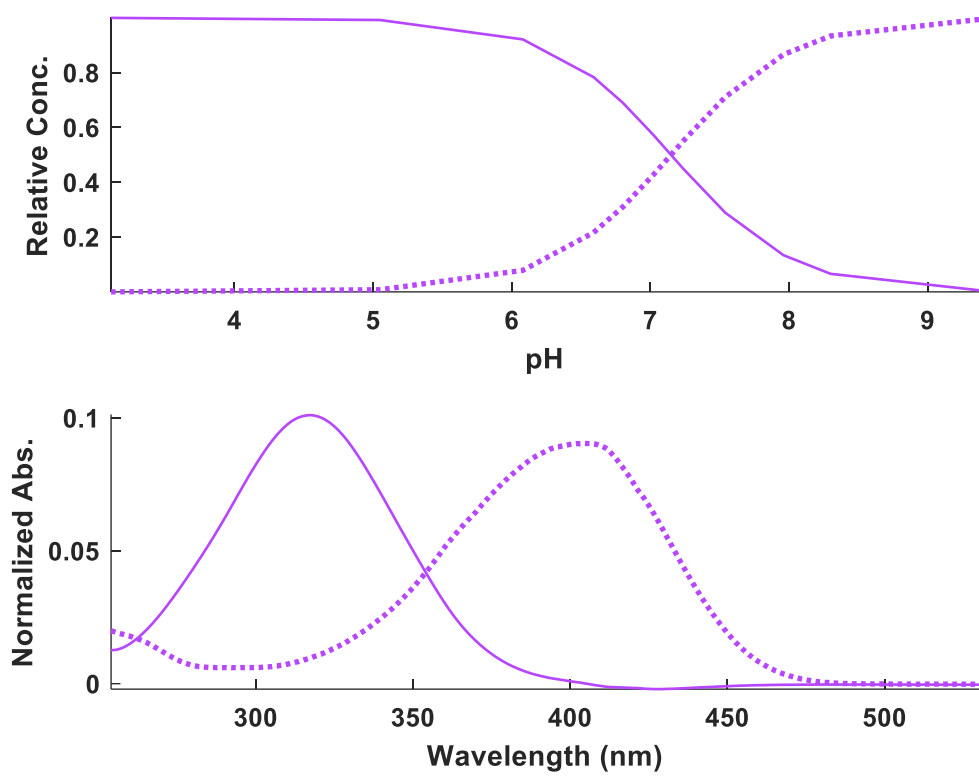

**Fig. S4.** The spectral and pH profiles of 4-NP

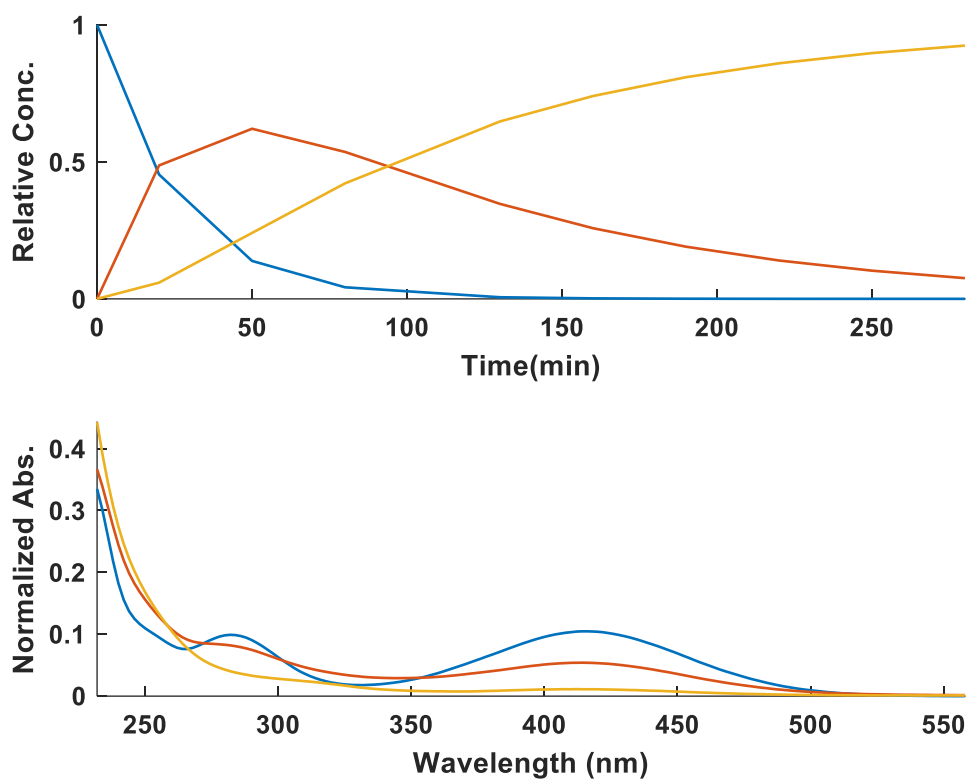

Fig. S5. Resolved profiles for 2-NP in basic media

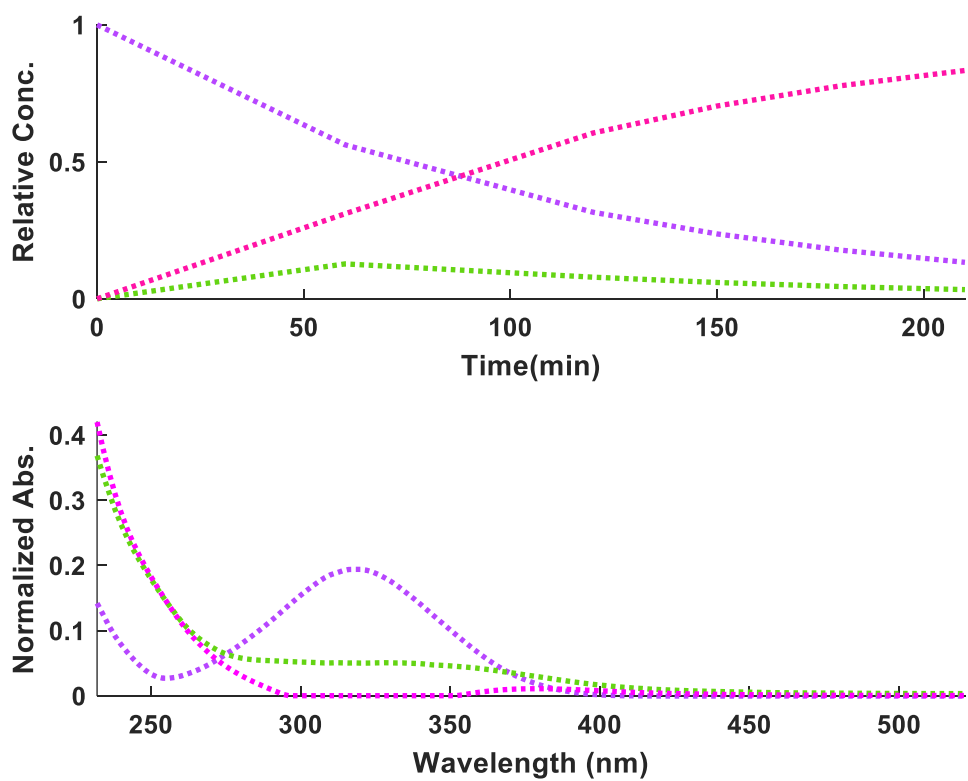

Fig. S6. Resolved profiles for 4-NP in acidic media

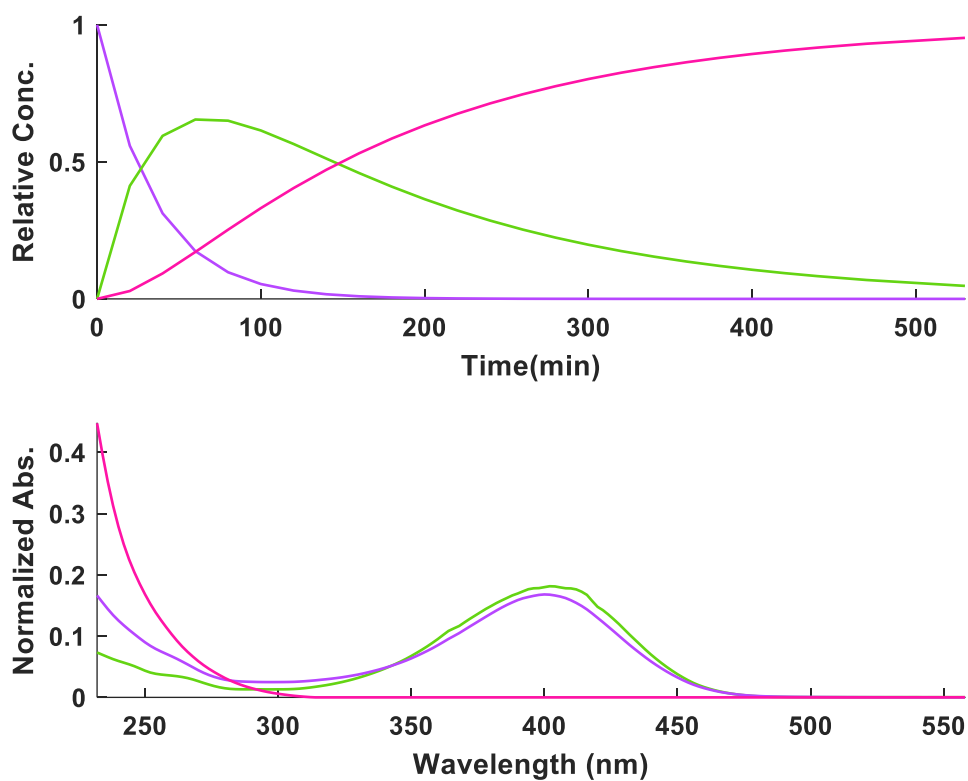

**Fig. S7.** Resolved profiles for 4-NP in basic media

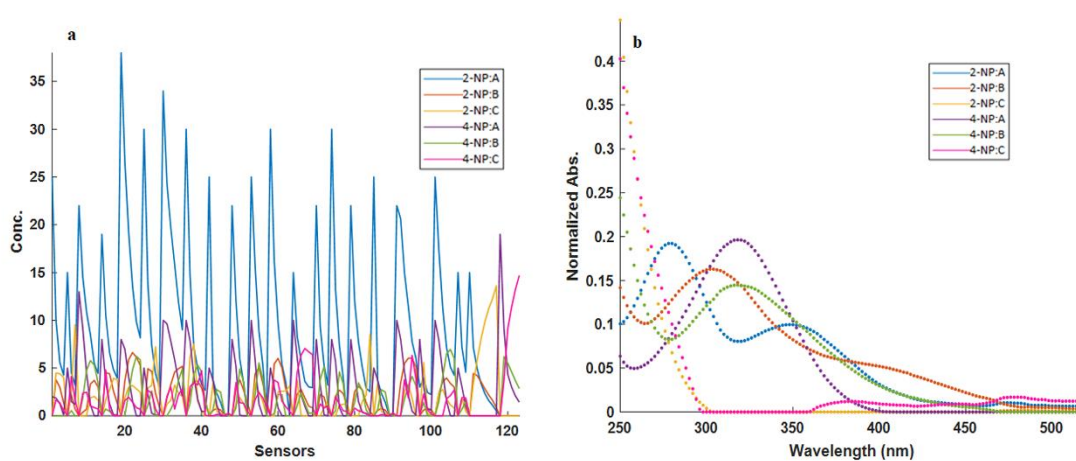

**Fig. S8.** The acquired profiles in (a) time and (b) wavelength mode by MA-MCR-ALS method for the mixtures of nitrophenols at acidic condition

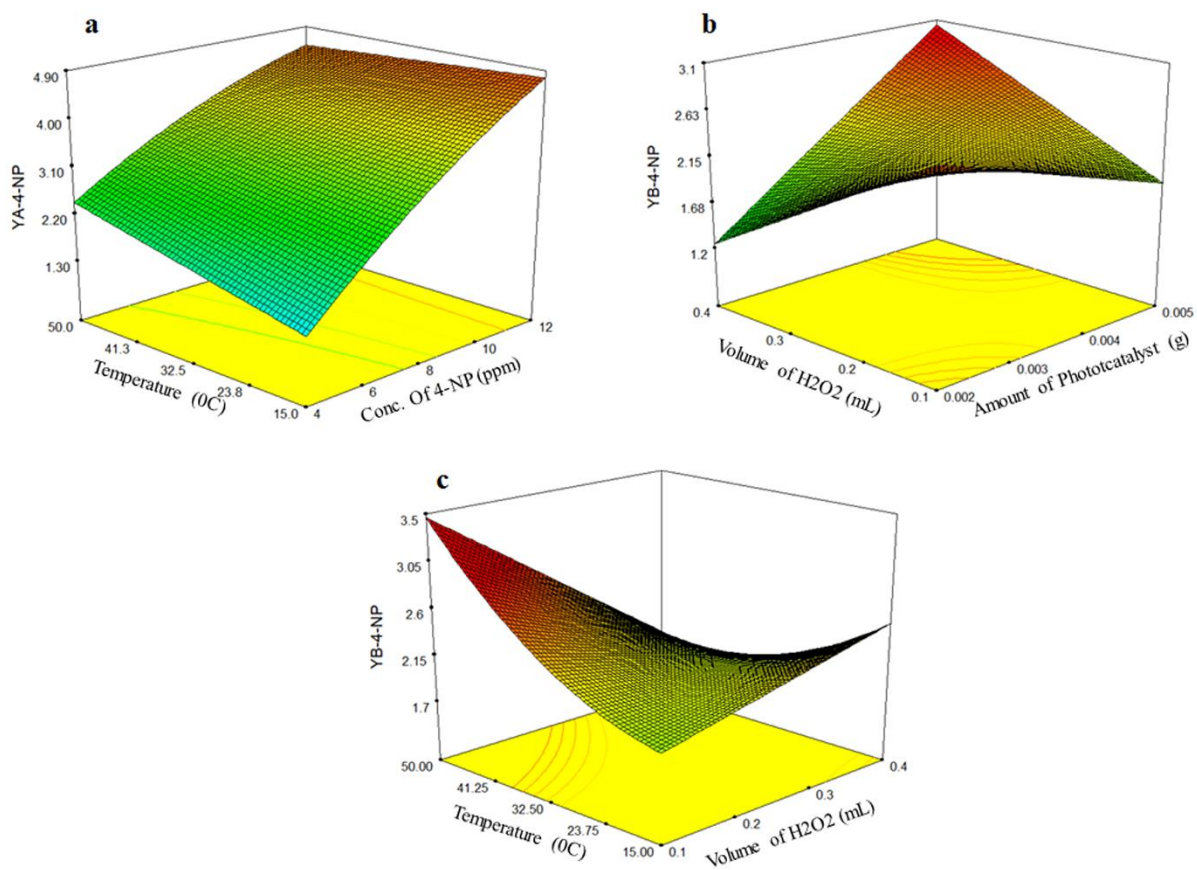

**Fig. S9.** Response surface for some components of 4-NP in basic condition

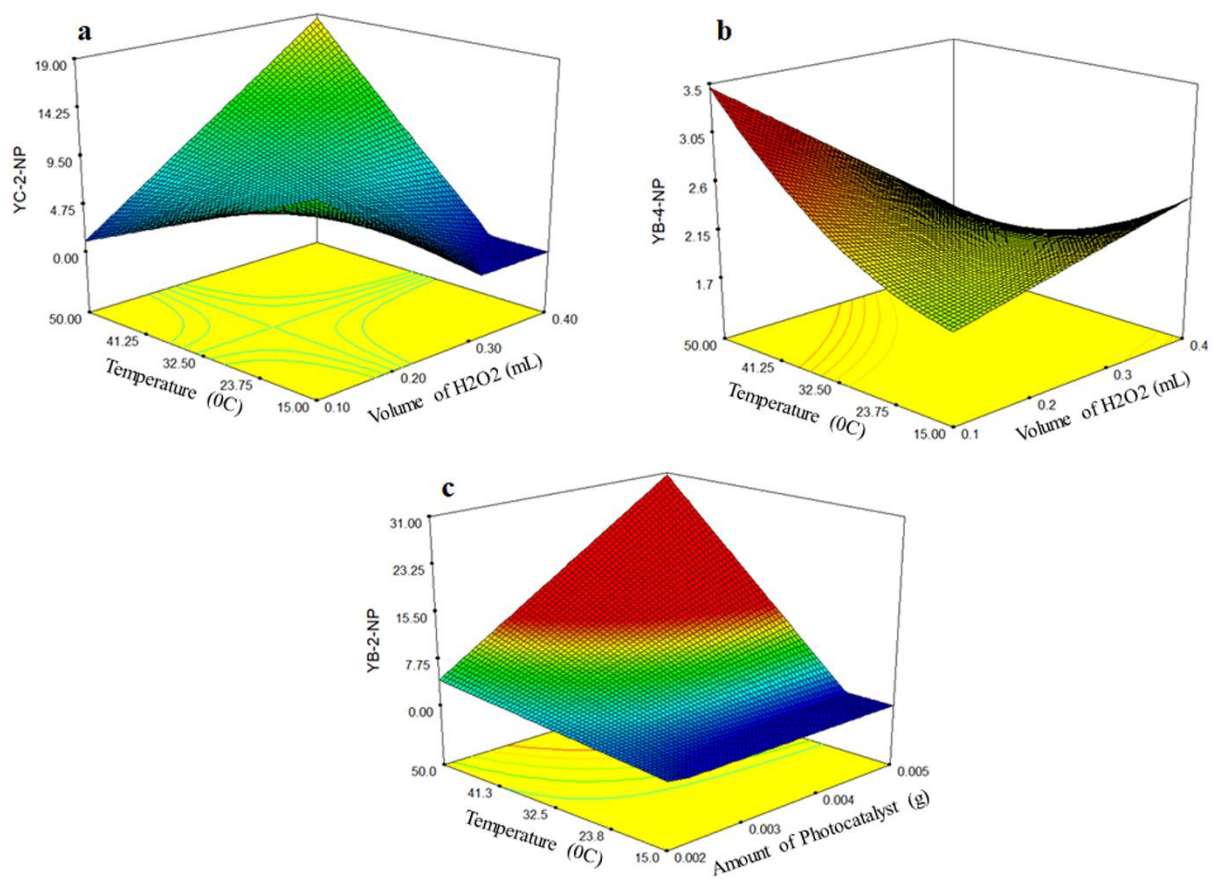

**Fig. S10.** Response surface for some components of 2-NP and 4-NP in basic condition

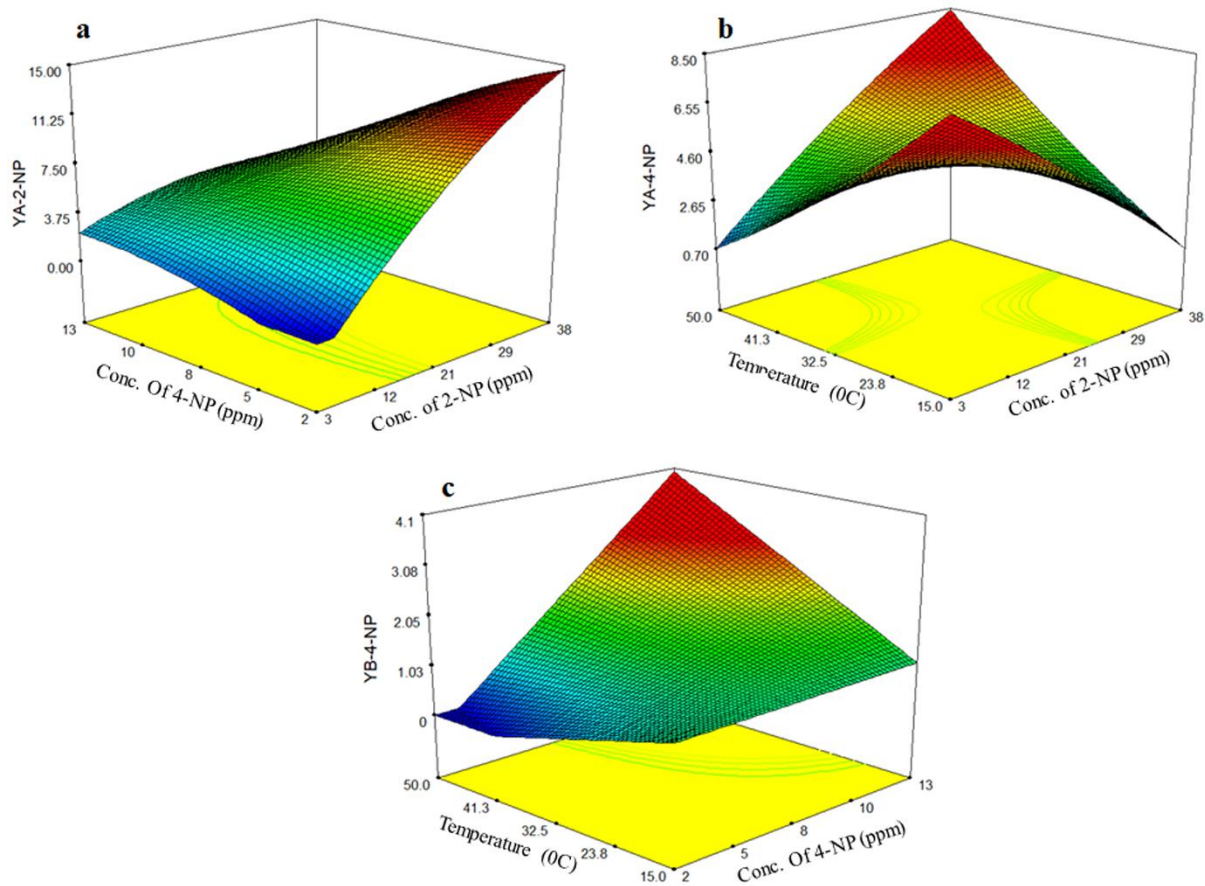

**Fig. S11.** Response surface for some components of 2-NP and 4-NP in acidic
