# Supplementary material for: A thorough investigation of photo-catalytic degradation of ortho and para-nitro phenols in binary mixtures: new insights into evaluating degradation progress using chemometrics approaches
Source: Royal Society of Chemistry journal article supplement (doi:10.1039/d1nj02153b), 2021-01-01
Supplement: d1nj02153b2.xlsx [file d1nj02153b2.xlsx]

## Sheet: Acidic Data
Wavelength	0	60	120	180	0	60	120	0	60	120	180	240	280	0	60	120	180	240	0	60	120	180	240	280	0	60	120	180	240	0	60	120	180	240	300	0	60	120	180	240	300	0	60	120	180	240	270	0	60
232	0.497166	0.678045	0.531734	0.355724	0.450503	0.50477	0.651841	0.894862	0.873397	0.903775	1.02879	0.902467	0.651527	0.748801	0.783331	0.566725	0.391807	0.290511	0.955113	1.04238	1.19838	1.26929	1.22432	1.09029	0.698277	0.878742	0.829707	0.566304	0.214902	0.977286	0.980689	1.00228	1.03909	1.10345	1.11525	0.904407	1.16518	1.32872	0.978714	0.793885	0.33203	0.611479	0.459465	0.408297	0.306444	0.0309029	0.00781862	0.740812	0.744096
234	0.505166	0.641025	0.496697	0.331399	0.439181	0.471653	0.598283	0.855143	0.823453	0.848382	0.961411	0.840317	0.607505	0.720015	0.739094	0.533352	0.36837	0.271767	0.949604	1.0058	1.13637	1.19241	1.14462	1.01939	0.699465	0.832602	0.776036	0.523882	0.203115	0.959569	0.942906	0.955146	0.9822	1.03428	1.04179	0.885081	1.08992	1.22682	0.907373	0.736882	0.30969	0.60622	0.423114	0.379344	0.284946	0.0285742	0.00815847	0.71755	0.704836
236	0.526612	0.613823	0.46888	0.313739	0.440949	0.443622	0.551891	0.842169	0.794902	0.805697	0.901533	0.782516	0.56721	0.708712	0.708524	0.5061	0.34907	0.257362	0.969935	0.992511	1.09243	1.12795	1.07374	0.952755	0.71838	0.801611	0.730271	0.488979	0.193126	0.968175	0.92944	0.927936	0.941462	0.979636	0.978962	0.891361	1.03699	1.13966	0.84474	0.684597	0.290135	0.61683	0.397692	0.352373	0.263295	0.0266304	0.00698761	0.715703	0.680534
238	0.558553	0.594835	0.447657	0.298871	0.453153	0.423422	0.511425	0.850835	0.780877	0.77364	0.850092	0.73215	0.531723	0.71341	0.687746	0.486684	0.33325	0.247277	1.01076	0.998876	1.0636	1.07536	1.0105	0.89495	0.752916	0.779096	0.692192	0.458849	0.184202	0.9999	0.937141	0.920124	0.917174	0.936666	0.926438	0.916481	1.00141	1.06741	0.789415	0.637765	0.274195	0.64013	0.375568	0.329092	0.244007	0.0244034	0.00621672	0.728152	0.666646
240	0.595418	0.583284	0.4322	0.287911	0.472375	0.409976	0.47803	0.877995	0.779769	0.748421	0.80528	0.685654	0.5001	0.73048	0.678027	0.472275	0.322441	0.23881	1.0666	1.01977	1.04807	1.03371	0.956937	0.845013	0.798292	0.768578	0.66051	0.43333	0.178429	1.0475	0.957651	0.925724	0.904579	0.906508	0.881791	0.959276	0.97983	1.00501	0.742591	0.595711	0.260162	0.671861	0.362643	0.309438	0.225558	0.0229442	0.00659445	0.755019	0.664315
242	0.640233	0.57752	0.421155	0.278711	0.498223	0.396663	0.44669	0.914594	0.787589	0.732213	0.767872	0.645264	0.472559	0.756692	0.672931	0.463788	0.315035	0.231829	1.13428	1.05248	1.04289	1.00206	0.91077	0.800587	0.852836	0.763735	0.635547	0.412697	0.174855	1.1086	0.992891	0.942549	0.903733	0.88203	0.846049	1.01351	0.969064	0.951996	0.700096	0.559216	0.248852	0.712903	0.352207	0.290545	0.208551	0.0202947	0.00684267	0.788523	0.668956
244	0.688432	0.578445	0.414042	0.271409	0.528786	0.389014	0.420412	0.960856	0.805783	0.723587	0.739153	0.610986	0.452019	0.790185	0.676369	0.460429	0.30917	0.228027	1.21219	1.09447	1.04898	0.980385	0.87474	0.766218	0.912711	0.767383	0.615719	0.394834	0.173028	1.17742	1.03585	0.96822	0.911217	0.871137	0.821323	1.07688	0.968479	0.90923	0.667503	0.529043	0.240249	0.758197	0.345459	0.278724	0.195265	0.0195188	0.00751557	0.830658	0.681029
246	0.738768	0.582972	0.410855	0.266485	0.561868	0.384238	0.397051	1.01511	0.829204	0.722904	0.720359	0.586792	0.435051	0.827488	0.68554	0.460953	0.306868	0.224354	1.29504	1.14239	1.06259	0.968661	0.85008	0.740652	0.976239	0.776197	0.60155	0.379587	0.170718	1.2537	1.08611	1.00177	0.9275	0.866339	0.804645	1.14434	0.975604	0.876628	0.643235	0.504354	0.233772	0.807834	0.343053	0.269024	0.183854	0.0182541	0.00568002	0.877719	0.696869
248	0.789115	0.59047	0.410138	0.263156	0.593969	0.38323	0.376951	1.07131	0.857171	0.728477	0.706858	0.567593	0.423529	0.868882	0.697794	0.463961	0.305342	0.223194	1.37813	1.19502	1.08316	0.967455	0.83442	0.724933	1.04087	0.789967	0.594847	0.368076	0.170789	1.33093	1.13916	1.03836	0.947581	0.870396	0.796691	1.21521	0.989221	0.853008	0.626586	0.486587	0.232103	0.857861	0.343385	0.261794	0.175727	0.0169834	0.00538031	0.926892	0.716653
250	0.83649	0.600618	0.410307	0.261756	0.628959	0.3826	0.35912	1.13159	0.889762	0.738038	0.701077	0.555408	0.416405	0.91038	0.712419	0.470166	0.307973	0.223992	1.46093	1.24743	1.10902	0.970364	0.824514	0.713895	1.10188	0.806318	0.590423	0.358752	0.169483	1.4082	1.1949	1.0792	0.974547	0.878779	0.794045	1.28624	1.00694	0.837563	0.616258	0.473751	0.230726	0.905745	0.344921	0.257627	0.170037	0.0162157	0.0063802	0.976283	0.739963
252	0.880883	0.612021	0.414045	0.259115	0.662957	0.383027	0.344328	1.1915	0.922697	0.748321	0.697879	0.546219	0.410457	0.953119	0.731986	0.478708	0.308528	0.223847	1.53883	1.30201	1.1368	0.978968	0.820668	0.707128	1.16186	0.824037	0.58933	0.350212	0.170465	1.48343	1.25042	1.12097	1.00384	0.891528	0.79492	1.35507	1.02814	0.827526	0.608042	0.464268	0.230521	0.952106	0.349718	0.255706	0.164165	0.0153132	0.00644435	1.02543	0.7631
254	0.918086	0.623158	0.417327	0.257796	0.693582	0.385399	0.332139	1.25003	0.954942	0.762516	0.697989	0.540744	0.408123	0.991385	0.748719	0.486953	0.30945	0.223026	1.60924	1.35076	1.16458	0.987943	0.818701	0.704589	1.21519	0.842308	0.59131	0.343308	0.170472	1.55177	1.30332	1.16203	1.03065	0.905948	0.800609	1.41816	1.05005	0.82159	0.60556	0.456884	0.23065	0.995192	0.356008	0.254957	0.160064	0.0148557	0.00608056	1.07028	0.787644
256	0.950486	0.631906	0.420728	0.256364	0.721364	0.388284	0.318186	1.30479	0.98801	0.775756	0.700449	0.537732	0.405547	1.02904	0.766564	0.496066	0.311552	0.222995	1.66939	1.39644	1.18947	0.99987	0.820716	0.703497	1.25884	0.858637	0.5916	0.336627	0.171061	1.61262	1.35036	1.19945	1.0587	0.921343	0.806958	1.4744	1.07192	0.820072	0.604702	0.453186	0.233456	1.03271	0.362598	0.255989	0.157749	0.0154111	0.00645686	1.11196	0.810757
258	0.97274	0.642047	0.423522	0.253298	0.744486	0.390942	0.308652	1.35402	1.01878	0.788852	0.704515	0.535785	0.406838	1.05898	0.782144	0.504328	0.31217	0.222334	1.71859	1.43267	1.21291	1.01227	0.824075	0.704251	1.29434	0.872457	0.593747	0.330541	0.171233	1.66396	1.39191	1.231	1.08437	0.93539	0.815486	1.52288	1.09209	0.820192	0.608426	0.450924	0.233604	1.06263	0.370783	0.258616	0.156446	0.0138171	0.00565691	1.14657	0.830235
260	0.99029	0.649363	0.425597	0.250704	0.763265	0.392059	0.298302	1.3982	1.04555	0.803494	0.710232	0.537181	0.407761	1.08541	0.794381	0.511847	0.31323	0.220395	1.75576	1.46441	1.232	1.02157	0.829168	0.707244	1.31896	0.884154	0.596906	0.325049	0.169026	1.70314	1.42699	1.25962	1.10631	0.950805	0.825204	1.56298	1.11161	0.82476	0.613238	0.451537	0.236692	1.08431	0.377149	0.261495	0.156494	0.013905	0.00570531	1.17487	0.849113
262	0.995747	0.650861	0.427084	0.246887	0.778994	0.39309	0.288343	1.43629	1.07182	0.816256	0.715939	0.54072	0.409665	1.107	0.805407	0.517333	0.311124	0.219713	1.78033	1.48741	1.24674	1.03147	0.83399	0.71178	1.33574	0.892182	0.598003	0.317474	0.168643	1.73296	1.45458	1.28421	1.12699	0.964802	0.835534	1.59194	1.12843	0.830756	0.619936	0.453702	0.239922	1.09988	0.383952	0.265983	0.157008	0.0144962	0.00557396	1.19898	0.864149
264	0.996655	0.65282	0.427955	0.242623	0.789388	0.394169	0.279257	1.46809	1.09536	0.829482	0.723235	0.543207	0.411697	1.1233	0.813793	0.522532	0.31064	0.215505	1.7938	1.50272	1.25891	1.03971	0.839077	0.716854	1.34261	0.897354	0.599229	0.311776	0.166112	1.75396	1.47833	1.30201	1.1423	0.977382	0.843986	1.61349	1.14239	0.836226	0.628237	0.456515	0.242167	1.10902	0.393314	0.271185	0.15915	0.0145498	0.00621395	1.21567	0.876681
266	0.987193	0.652083	0.42678	0.238124	0.796966	0.393455	0.270307	1.49558	1.11613	0.841144	0.728871	0.548208	0.414169	1.13437	0.818621	0.525606	0.30683	0.212142	1.79663	1.50985	1.26555	1.04659	0.842802	0.719679	1.34012	0.898259	0.599086	0.304492	0.162902	1.765	1.49303	1.31671	1.15637	0.988084	0.854173	1.62705	1.15419	0.845256	0.636716	0.460402	0.244311	1.1116	0.401641	0.277106	0.16018	0.0137893	0.00707754	1.22665	0.887241
268	0.972999	0.646838	0.423084	0.231458	0.800815	0.393089	0.263286	1.51964	1.13245	0.851238	0.734432	0.550815	0.415939	1.14287	0.822447	0.526798	0.301758	0.207548	1.78931	1.50979	1.26808	1.05014	0.846535	0.722791	1.32948	0.896291	0.598926	0.295425	0.158557	1.76803	1.5022	1.32519	1.16552	0.99691	0.861013	1.63195	1.16402	0.851865	0.645474	0.464603	0.245319	1.10789	0.408965	0.283494	0.162553	0.0149419	0.0057673	1.23246	0.894262
270	0.952481	0.642281	0.420362	0.223513	0.80169	0.392998	0.255285	1.53738	1.14804	0.861143	0.739484	0.555139	0.417803	1.14627	0.825358	0.526289	0.295647	0.200303	1.77218	1.50501	1.26579	1.05144	0.848574	0.724316	1.31258	0.89227	0.595968	0.287148	0.155071	1.76187	1.50684	1.33153	1.17108	1.0028	0.86859	1.6311	1.17143	0.861387	0.655703	0.470657	0.247859	1.09931	0.417425	0.28908	0.164624	0.0154409	0.00419885	1.23365	0.899475
272	0.925969	0.633869	0.416709	0.215746	0.800023	0.39067	0.248047	1.55331	1.16312	0.869289	0.744097	0.557601	0.418781	1.14618	0.823957	0.523881	0.289365	0.195073	1.74829	1.49394	1.2604	1.04922	0.849478	0.725384	1.28908	0.884167	0.593544	0.277189	0.14948	1.74962	1.50771	1.33276	1.17461	1.00769	0.874901	1.6239	1.17887	0.870891	0.665459	0.476749	0.248936	1.08601	0.424806	0.295272	0.166771	0.0149107	0.00526862	1.23159	0.900852
274	0.896187	0.623818	0.410943	0.208174	0.795314	0.388151	0.240654	1.56688	1.17566	0.877169	0.747515	0.560863	0.419878	1.14394	0.82109	0.521584	0.282021	0.188306	1.71902	1.47942	1.25046	1.04477	0.847933	0.723904	1.26089	0.873056	0.587073	0.267503	0.144091	1.73302	1.50448	1.3312	1.17702	1.011	0.879426	1.61329	1.18353	0.878821	0.674423	0.4806	0.249761	1.06898	0.431541	0.301133	0.170018	0.016339	0.00531827	1.22462	0.903026
276	0.863324	0.612639	0.402795	0.198627	0.789626	0.383106	0.233456	1.57808	1.18699	0.883689	0.749833	0.561455	0.418249	1.13947	0.817449	0.516661	0.274003	0.179885	1.68393	1.45943	1.23922	1.03924	0.845233	0.721925	1.2293	0.859868	0.581794	0.258014	0.13838	1.71092	1.49826	1.32817	1.17527	1.01387	0.882304	1.59772	1.18649	0.886621	0.68337	0.485268	0.249889	1.0493	0.439793	0.307244	0.171811	0.0161351	0.00523832	1.21758	0.902726
278	0.828099	0.600042	0.397536	0.1904	0.782687	0.380017	0.226883	1.58836	1.19818	0.889844	0.751212	0.56195	0.417243	1.1355	0.813135	0.511191	0.26478	0.171358	1.6471	1.44013	1.22682	1.03315	0.841184	0.719487	1.19522	0.846306	0.574429	0.245969	0.131738	1.68904	1.49057	1.32334	1.17292	1.01393	0.883513	1.58206	1.19053	0.895426	0.691678	0.488488	0.251055	1.02876	0.448157	0.31212	0.173239	0.0163964	0.00424174	1.20934	0.900937
280	0.792252	0.587569	0.391309	0.179407	0.775689	0.377634	0.221499	1.59748	1.20832	0.894758	0.75115	0.561817	0.415756	1.13103	0.806657	0.505881	0.25557	0.163506	1.61064	1.41863	1.21107	1.02329	0.835629	0.715791	1.16047	0.832218	0.565608	0.236409	0.127364	1.66611	1.4834	1.31771	1.17006	1.01334	0.88458	1.56609	1.19187	0.903003	0.697335	0.491009	0.251277	1.00677	0.45524	0.317786	0.175364	0.01565	0.00520601	1.20032	0.899879
282	0.759313	0.576337	0.383712	0.173286	0.76871	0.373045	0.215531	1.60628	1.21859	0.899864	0.750817	0.561369	0.41387	1.12492	0.799679	0.499178	0.247172	0.156889	1.57437	1.3971	1.19722	1.01469	0.828367	0.711321	1.1289	0.817078	0.557628	0.227157	0.1215	1.6437	1.47423	1.31303	1.16557	1.01176	0.884067	1.55028	1.19403	0.90915	0.703704	0.493974	0.250635	0.985727	0.462494	0.323119	0.177906	0.0166888	0.00463627	1.19091	0.897109
284	0.727051	0.563849	0.377829	0.163466	0.763867	0.369796	0.210603	1.61586	1.22777	0.904613	0.749726	0.559578	0.410181	1.12119	0.794197	0.493175	0.237473	0.149513	1.541	1.37861	1.18324	1.0056	0.82163	0.705665	1.09811	0.802198	0.549223	0.216753	0.114595	1.62185	1.46742	1.30543	1.16193	1.00839	0.883609	1.53588	1.19615	0.915614	0.707253	0.495925	0.249029	0.96771	0.469021	0.32797	0.177972	0.0166583	0.00433503	1.18276	0.895435
286	0.698851	0.552491	0.371002	0.157746	0.75843	0.366537	0.206382	1.62455	1.23865	0.909486	0.747507	0.557758	0.407271	1.11846	0.786294	0.486579	0.230411	0.141988	1.51048	1.3581	1.16811	0.993727	0.814664	0.700099	1.06979	0.788443	0.540716	0.207866	0.109634	1.60548	1.46066	1.30098	1.15735	1.00676	0.881846	1.52271	1.19889	0.921177	0.712071	0.497145	0.248253	0.951057	0.475622	0.332025	0.180225	0.0162133	0.004738	1.17441	0.892093
288	0.665917	0.5383	0.362351	0.148156	0.751329	0.361398	0.201216	1.63104	1.24446	0.914536	0.748427	0.55826	0.404724	1.11219	0.777603	0.476274	0.219813	0.135042	1.47562	1.33464	1.1504	0.982744	0.807708	0.693486	1.03883	0.770727	0.531643	0.197202	0.10381	1.58164	1.45056	1.2914	1.15105	1.00302	0.880641	1.50619	1.19845	0.92677	0.717641	0.499959	0.247199	0.92924	0.481546	0.33641	0.18283	0.0172364	0.00381385	1.16564	0.888641
290	0.636921	0.524857	0.354375	0.139145	0.743442	0.355939	0.196671	1.63539	1.25442	0.919948	0.749244	0.556822	0.40339	1.10733	0.768622	0.468159	0.210976	0.128714	1.44328	1.31399	1.13547	0.973285	0.801663	0.688903	1.01036	0.756473	0.52122	0.188068	0.0990069	1.562	1.44072	1.28374	1.14401	0.999538	0.878802	1.49097	1.19862	0.932142	0.722421	0.500719	0.246252	0.909737	0.486992	0.340754	0.183803	0.0165112	0.00333551	1.15692	0.883696
292	0.619542	0.515802	0.348474	0.133957	0.7416	0.352848	0.194008	1.6428	1.26	0.924153	0.74756	0.553951	0.400873	1.10588	0.763644	0.462262	0.203618	0.123222	1.42635	1.30185	1.12322	0.962605	0.793742	0.682567	0.99307	0.744342	0.51486	0.180931	0.0957027	1.55108	1.43724	1.27893	1.13932	0.995616	0.875986	1.48277	1.19906	0.934046	0.723145	0.501987	0.245269	0.899477	0.491478	0.342983	0.185432	0.0175533	0.00419562	1.15398	0.882552
294	0.605816	0.507271	0.3435	0.128892	0.740022	0.350206	0.19164	1.64892	1.26536	0.926392	0.743981	0.55046	0.396842	1.1053	0.757087	0.455927	0.198112	0.118069	1.41413	1.29129	1.11337	0.953593	0.785855	0.675534	0.982471	0.734368	0.506991	0.175958	0.0915515	1.54419	1.43426	1.27496	1.13537	0.99203	0.870277	1.48049	1.1995	0.93482	0.722789	0.500346	0.243643	0.892586	0.494526	0.344399	0.186013	0.0180147	0.00231676	1.15296	0.879596
296	0.596291	0.501008	0.338687	0.126151	0.738307	0.347371	0.188484	1.65427	1.27103	0.927775	0.741764	0.546905	0.39332	1.10586	0.752773	0.450217	0.192646	0.1143	1.40627	1.28346	1.10442	0.945909	0.777625	0.670821	0.973283	0.725915	0.500712	0.169246	0.0897065	1.53972	1.43186	1.27294	1.13158	0.987675	0.868011	1.47825	1.20058	0.934577	0.721454	0.499895	0.241929	0.886759	0.4971	0.346324	0.185376	0.0177636	0.00292965	1.15088	0.878664
298	0.591129	0.494368	0.335187	0.121989	0.739643	0.34536	0.188089	1.66064	1.27479	0.931594	0.738611	0.543371	0.389855	1.10684	0.747437	0.444939	0.186727	0.111683	1.40122	1.2781	1.09635	0.937339	0.771544	0.663113	0.969127	0.719788	0.494075	0.165624	0.0868672	1.53845	1.43131	1.27005	1.12786	0.983595	0.862643	1.47756	1.20024	0.934231	0.720713	0.497829	0.240703	0.884708	0.498779	0.346696	0.184597	0.0178938	0.00368112	1.15192	0.876299
300	0.589247	0.490304	0.331982	0.121257	0.738071	0.343182	0.187644	1.66012	1.27556	0.930657	0.734929	0.538601	0.385374	1.10704	0.742664	0.439729	0.183649	0.110284	1.40033	1.27263	1.08912	0.929589	0.762621	0.656384	0.968119	0.712035	0.488139	0.161821	0.0858874	1.53719	1.42789	1.26696	1.12219	0.976911	0.857088	1.47674	1.19792	0.92929	0.717266	0.494127	0.238824	0.882184	0.498354	0.346209	0.18418	0.0170215	0.00390439	1.15104	0.87279
302	0.589209	0.484448	0.3277	0.119268	0.73829	0.339701	0.184977	1.65858	1.27264	0.927502	0.729371	0.534098	0.381741	1.10545	0.737793	0.434739	0.180977	0.107893	1.39955	1.26791	1.08084	0.920094	0.755576	0.649415	0.967513	0.70675	0.482589	0.159228	0.0850996	1.536	1.42544	1.26298	1.11574	0.970089	0.849842	1.47686	1.19336	0.923768	0.711988	0.489956	0.237097	0.883519	0.495454	0.343882	0.183268	0.0164638	0.00392848	1.15001	0.868879
304	0.591696	0.480938	0.324335	0.11825	0.737283	0.337048	0.184269	1.65428	1.26967	0.92491	0.72466	0.527725	0.377456	1.10324	0.730864	0.427819	0.177166	0.106675	1.3995	1.26355	1.07357	0.912169	0.747174	0.642485	0.968789	0.701253	0.476878	0.157241	0.0840824	1.53421	1.42074	1.25479	1.1076	0.962893	0.842576	1.47348	1.1876	0.917436	0.705158	0.486081	0.23428	0.883568	0.493302	0.342129	0.182283	0.0177961	0.00286423	1.14843	0.863998
306	0.595025	0.476186	0.319453	0.116099	0.734284	0.33327	0.183381	1.6429	1.26019	0.919851	0.71771	0.522697	0.374215	1.09845	0.722048	0.421669	0.176193	0.104679	1.39935	1.25511	1.06469	0.902996	0.737788	0.636892	0.971282	0.694635	0.471416	0.154636	0.082145	1.53073	1.41177	1.24641	1.0965	0.953024	0.833435	1.47048	1.17768	0.907031	0.697754	0.480887	0.231736	0.881821	0.489103	0.339693	0.181025	0.0179389	0.00374223	1.14401	0.857693
308	0.598941	0.470725	0.315379	0.116913	0.729662	0.32922	0.181172	1.62576	1.24743	0.912773	0.711617	0.517367	0.369931	1.08914	0.714263	0.414788	0.173146	0.105192	1.39736	1.24597	1.05379	0.892416	0.731198	0.629992	0.97092	0.687511	0.466278	0.152273	0.082511	1.52434	1.39957	1.23383	1.08462	0.9416	0.822914	1.46166	1.1643	0.894828	0.690037	0.475428	0.228194	0.87881	0.481457	0.335771	0.18018	0.0169175	0.00353277	1.13609	0.847451
310	0.603236	0.465304	0.310462	0.115769	0.724161	0.324471	0.178007	1.60443	1.22967	0.901551	0.702767	0.510592	0.365118	1.07722	0.702731	0.407435	0.170154	0.10451	1.39286	1.23437	1.04123	0.880122	0.720923	0.621249	0.971091	0.678787	0.460128	0.150594	0.081781	1.51338	1.38442	1.2183	1.06815	0.928391	0.810763	1.45093	1.14832	0.880608	0.677179	0.469138	0.226154	0.87633	0.473336	0.330374	0.177439	0.0164942	0.00267816	1.12597	0.835679
312	0.605945	0.459593	0.305121	0.115117	0.714955	0.318952	0.1743	1.57693	1.20868	0.887863	0.693295	0.502779	0.358699	1.06321	0.690645	0.401335	0.168731	0.104207	1.38413	1.22031	1.02829	0.868209	0.711193	0.612622	0.967946	0.67168	0.453085	0.148748	0.0826656	1.49968	1.36618	1.20114	1.05132	0.912263	0.796732	1.43413	1.12819	0.864044	0.666692	0.461354	0.221498	0.870966	0.462581	0.324964	0.175139	0.0181565	0.00357478	1.11057	0.821833
314	0.609154	0.45199	0.299246	0.114715	0.70484	0.314564	0.173569	1.54521	1.1835	0.872032	0.681015	0.494808	0.352998	1.04499	0.678082	0.392721	0.167046	0.103299	1.37485	1.20263	1.01177	0.853439	0.699687	0.602331	0.962968	0.661791	0.445279	0.147176	0.081507	1.48044	1.34244	1.17911	1.03015	0.89593	0.78143	1.41489	1.10383	0.844999	0.651433	0.452267	0.217539	0.863464	0.450959	0.318847	0.172199	0.0162449	0.0020823	1.09569	0.806412
316	0.611048	0.444839	0.293184	0.114962	0.692155	0.306738	0.170088	1.50681	1.15317	0.854149	0.668204	0.485034	0.346965	1.02385	0.664428	0.3847	0.165289	0.103054	1.361	1.18479	0.994593	0.837875	0.687896	0.591743	0.956557	0.652386	0.43892	0.145241	0.0801943	1.45998	1.31482	1.15305	1.00725	0.87615	0.763863	1.39041	1.07842	0.823058	0.635947	0.441717	0.211913	0.85307	0.437875	0.310972	0.169048	0.0163158	0.00323789	1.07395	0.789251
318	0.610811	0.437892	0.287224	0.114916	0.67855	0.300082	0.165766	1.46703	1.12249	0.834895	0.655404	0.47561	0.340021	1.00107	0.6501	0.375863	0.163142	0.102685	1.34292	1.16415	0.974798	0.823452	0.674533	0.582387	0.947039	0.640446	0.432118	0.145705	0.0815638	1.43265	1.28588	1.12762	0.983896	0.855723	0.74868	1.36434	1.05069	0.801429	0.620935	0.432846	0.208537	0.84099	0.424412	0.30157	0.16634	0.0162089	0.00317131	1.05222	0.771079
320	0.609989	0.428321	0.280581	0.115413	0.663292	0.292991	0.163518	1.42442	1.08971	0.814954	0.642188	0.467999	0.334533	0.977782	0.633924	0.368378	0.161371	0.102026	1.32451	1.13966	0.957363	0.808453	0.663998	0.572426	0.937778	0.630082	0.424325	0.14432	0.0812045	1.40462	1.25607	1.10003	0.96053	0.835412	0.730194	1.33437	1.02133	0.778237	0.604197	0.422829	0.203055	0.828806	0.409876	0.294651	0.162985	0.0160697	0.00299983	1.0285	0.750663
322	0.60739	0.42082	0.274643	0.114659	0.646721	0.285498	0.15875	1.37868	1.05694	0.793024	0.627939	0.457801	0.328564	0.950549	0.618865	0.359827	0.160079	0.101875	1.30276	1.11569	0.936135	0.791271	0.653443	0.56298	0.925102	0.618086	0.417071	0.141844	0.0804655	1.37381	1.22125	1.06981	0.934559	0.815353	0.712108	1.30396	0.990678	0.75605	0.588894	0.413604	0.198391	0.814658	0.395881	0.287263	0.159299	0.0164135	0.00288089	1.00271	0.73028
324	0.604953	0.413809	0.268821	0.115069	0.6306	0.278605	0.155352	1.33132	1.01885	0.770158	0.614519	0.448848	0.322601	0.922849	0.602136	0.352688	0.159354	0.102423	1.27851	1.092	0.917098	0.775989	0.641175	0.554095	0.913138	0.606835	0.410103	0.1422	0.080663	1.34256	1.18695	1.04051	0.908399	0.792878	0.695593	1.27068	0.959565	0.732098	0.57351	0.403591	0.194313	0.799836	0.379525	0.278968	0.155885	0.0149804	0.00311361	0.97572	0.70951
326	0.602983	0.405065	0.26342	0.115804	0.614348	0.272444	0.151979	1.28278	0.981291	0.747377	0.599685	0.439828	0.316756	0.894361	0.586688	0.344159	0.157552	0.102086	1.25377	1.06562	0.89775	0.760272	0.629062	0.54412	0.898272	0.595365	0.403649	0.141513	0.0796487	1.30821	1.15218	1.01023	0.88246	0.772594	0.677659	1.23692	0.926139	0.70851	0.555137	0.394032	0.189106	0.78405	0.363039	0.268724	0.152481	0.0151199	0.00191147	0.9475	0.687048
328	0.596433	0.39682	0.256993	0.114558	0.593872	0.264053	0.146864	1.23236	0.944526	0.722001	0.584643	0.430742	0.310792	0.863392	0.56939	0.335423	0.155555	0.100609	1.22533	1.03779	0.875069	0.743101	0.617605	0.533165	0.881426	0.582635	0.396187	0.140502	0.0808728	1.27127	1.11457	0.976392	0.853175	0.749574	0.658794	1.20017	0.893844	0.683831	0.538759	0.383519	0.184483	0.765663	0.348358	0.259954	0.149579	0.0143744	0.00298124	0.917916	0.664661
330	0.589338	0.386512	0.250507	0.113171	0.575121	0.255654	0.142363	1.18036	0.905515	0.698015	0.569495	0.422082	0.304364	0.832241	0.55268	0.327167	0.153455	0.0999678	1.19491	1.00884	0.851269	0.725664	0.605016	0.523182	0.862981	0.568188	0.388102	0.138845	0.0797166	1.23269	1.07532	0.942874	0.825724	0.727003	0.640852	1.16	0.859014	0.659731	0.52271	0.372399	0.179529	0.74604	0.330914	0.252162	0.145967	0.0137824	0.0037643	0.88676	0.640674
332	0.580003	0.377881	0.241848	0.112127	0.554464	0.247864	0.1375	1.12734	0.865201	0.671897	0.553668	0.411973	0.297594	0.799241	0.532559	0.318838	0.152625	0.0984549	1.1616	0.976288	0.827	0.70828	0.592756	0.513085	0.840677	0.554179	0.380074	0.137034	0.0779866	1.1909	1.03461	0.907569	0.796189	0.703203	0.62151	1.11997	0.823512	0.633579	0.506207	0.362698	0.174729	0.726015	0.315057	0.24135	0.14223	0.013504	0.0024389	0.853409	0.617637
334	0.570483	0.366242	0.236451	0.111093	0.533043	0.240752	0.132438	1.07244	0.823434	0.646039	0.538117	0.402328	0.290976	0.765807	0.514269	0.309876	0.150288	0.0984213	1.12632	0.943466	0.802762	0.688992	0.57976	0.500714	0.818794	0.540452	0.371828	0.135719	0.0780692	1.14702	0.992452	0.872825	0.766779	0.678	0.601431	1.0758	0.786257	0.607738	0.488302	0.351604	0.169275	0.702496	0.299123	0.232862	0.138126	0.0123445	0.00223329	0.819144	0.593012
336	0.558109	0.35525	0.227834	0.109527	0.51083	0.23168	0.126788	1.01752	0.783288	0.6185	0.521691	0.391857	0.284268	0.730426	0.495958	0.300626	0.147504	0.0969085	1.08795	0.91123	0.776989	0.670027	0.564888	0.489275	0.794806	0.523323	0.363527	0.133649	0.0770139	1.10493	0.949747	0.835806	0.736103	0.653786	0.5812	1.03205	0.751114	0.582089	0.469449	0.341219	0.164324	0.679992	0.280791	0.223468	0.134536	0.0132658	0.00233625	0.784042	0.566616
338	0.544882	0.344837	0.220779	0.107245	0.487254	0.222736	0.121203	0.96279	0.741658	0.591634	0.505245	0.381487	0.276519	0.696036	0.476111	0.290467	0.144717	0.0952231	1.04965	0.874806	0.751721	0.650561	0.550721	0.477746	0.768601	0.508901	0.352843	0.131729	0.0757133	1.05838	0.906366	0.798066	0.704289	0.628866	0.561406	0.987482	0.714606	0.556321	0.451844	0.330361	0.15846	0.655105	0.264295	0.213862	0.129813	0.0122639	0.00175313	0.747981	0.541843
340	0.530019	0.333656	0.213046	0.106415	0.46456	0.21389	0.117007	0.906946	0.698618	0.564576	0.487579	0.370268	0.269437	0.659491	0.457637	0.281681	0.141861	0.0938901	1.00876	0.840054	0.725022	0.631119	0.537197	0.466431	0.742669	0.492491	0.345362	0.128797	0.0745584	1.00907	0.861917	0.760478	0.673847	0.604184	0.539996	0.940526	0.676553	0.530474	0.434858	0.318759	0.153314	0.628634	0.248316	0.20385	0.127115	0.0120178	0.00275844	0.711317	0.515646
342	0.514189	0.321199	0.205594	0.104874	0.441026	0.20538	0.110553	0.850805	0.657106	0.536891	0.470501	0.360556	0.262571	0.624177	0.437405	0.271674	0.140078	0.0921686	0.965597	0.803848	0.697132	0.61022	0.52224	0.453936	0.713174	0.474258	0.335718	0.125727	0.0723496	0.961258	0.816723	0.722666	0.642137	0.57917	0.521118	0.893385	0.639847	0.505782	0.41724	0.307193	0.148524	0.602599	0.231248	0.19487	0.122018	0.0111406	0.00311431	0.673561	0.490041
344	0.497259	0.30965	0.197068	0.102103	0.4178	0.195778	0.105981	0.796101	0.615206	0.509346	0.452309	0.347662	0.254335	0.587487	0.416887	0.262926	0.136158	0.0904233	0.921317	0.766791	0.668816	0.589326	0.507057	0.43941	0.683498	0.457344	0.325385	0.123618	0.0725401	0.911678	0.771479	0.685213	0.610821	0.554049	0.498602	0.846153	0.602848	0.478919	0.398663	0.295067	0.142894	0.575262	0.215713	0.184403	0.118501	0.0118582	0.00296519	0.636815	0.464619
346	0.479993	0.298514	0.190241	0.100725	0.394074	0.187548	0.0997286	0.742644	0.576352	0.480887	0.434301	0.337732	0.246662	0.55292	0.398686	0.252671	0.133371	0.0873381	0.878972	0.730545	0.64121	0.568828	0.491445	0.427305	0.654031	0.440863	0.316016	0.121171	0.0707239	0.864413	0.729272	0.647528	0.580364	0.527214	0.479748	0.799249	0.566837	0.454212	0.381293	0.285146	0.137747	0.548857	0.201341	0.175697	0.113571	0.0114423	0.00273633	0.601716	0.438962
348	0.458868	0.283617	0.180027	0.0972917	0.368964	0.177479	0.0945642	0.688937	0.534759	0.453162	0.415167	0.325308	0.237884	0.515629	0.37756	0.242715	0.129006	0.0850061	0.829215	0.689877	0.609323	0.544662	0.472493	0.411821	0.618534	0.420925	0.303695	0.116972	0.0673158	0.811637	0.681391	0.608892	0.546906	0.501748	0.457964	0.74945	0.530202	0.427882	0.363494	0.271901	0.131296	0.516998	0.186055	0.16655	0.109476	0.0111227	0.00338242	0.562335	0.41239
350	0.436645	0.270537	0.173346	0.0928612	0.344322	0.168251	0.0884235	0.635584	0.495867	0.425084	0.396392	0.311848	0.229031	0.479324	0.356768	0.231199	0.12517	0.0822883	0.78018	0.649106	0.578961	0.520941	0.456697	0.397012	0.585391	0.400964	0.293311	0.113252	0.0653924	0.759788	0.637664	0.5708	0.516186	0.474945	0.435475	0.69895	0.493906	0.403607	0.346043	0.261308	0.125685	0.488087	0.170518	0.157709	0.105555	0.00940455	0.00208393	0.524078	0.3869
352	0.417723	0.260304	0.165095	0.0895204	0.323666	0.161081	0.0826116	0.59017	0.461117	0.401184	0.379469	0.302382	0.220477	0.448276	0.340875	0.222654	0.122243	0.0805906	0.738224	0.615821	0.554417	0.502361	0.440412	0.384262	0.554552	0.384266	0.283361	0.1097	0.0649295	0.714226	0.598443	0.536108	0.487415	0.452739	0.41775	0.655915	0.462544	0.382321	0.330634	0.250009	0.119979	0.46135	0.158348	0.149743	0.100647	0.00975593	0.00119332	0.490461	0.365342
354	0.398535	0.248747	0.159053	0.087065	0.303203	0.153277	0.078259	0.546275	0.428136	0.37718	0.363574	0.290099	0.213299	0.41818	0.323184	0.21458	0.117832	0.0770198	0.696678	0.582892	0.52883	0.481327	0.425295	0.371363	0.524953	0.368133	0.273565	0.106366	0.0611462	0.670762	0.55929	0.50482	0.462492	0.430603	0.399888	0.613954	0.432244	0.36171	0.314669	0.240778	0.115622	0.435406	0.14599	0.140692	0.0976168	0.00881766	0.00208318	0.459266	0.343192
356	0.378918	0.236683	0.152135	0.0840135	0.282652	0.145934	0.0744243	0.503928	0.397492	0.354995	0.347112	0.279539	0.206054	0.389454	0.306841	0.205844	0.114163	0.0743417	0.655937	0.550072	0.503377	0.461641	0.410174	0.357634	0.496668	0.352307	0.262794	0.102483	0.0590816	0.628411	0.524331	0.474583	0.435575	0.409651	0.38144	0.57408	0.403263	0.342682	0.300385	0.230706	0.11002	0.411202	0.134484	0.13281	0.0928637	0.00941206	0.00186348	0.427763	0.323448
358	0.359769	0.226161	0.145074	0.0818741	0.263359	0.138008	0.0685488	0.463664	0.366417	0.332043	0.332101	0.268885	0.198656	0.36048	0.291416	0.19753	0.110413	0.0725329	0.615816	0.517926	0.477743	0.442883	0.394681	0.344562	0.467361	0.336009	0.253171	0.098931	0.0565251	0.586358	0.487719	0.445017	0.411709	0.388672	0.363486	0.534732	0.375974	0.321729	0.285867	0.220637	0.105179	0.3856	0.122996	0.126009	0.0884293	0.00895326	0.00175606	0.398486	0.30322
360	0.33915	0.215642	0.137567	0.0781423	0.244482	0.131227	0.0649674	0.426644	0.337629	0.312245	0.315486	0.258514	0.189921	0.334357	0.276388	0.189433	0.1066	0.0694877	0.57738	0.487288	0.453906	0.423245	0.378854	0.331889	0.438823	0.320371	0.243836	0.0967841	0.055437	0.546587	0.455151	0.417201	0.387185	0.36898	0.346688	0.497116	0.351435	0.303411	0.272373	0.211185	0.101334	0.362727	0.112968	0.118925	0.0843628	0.00852038	0.00255733	0.369169	0.282692
362	0.321861	0.205563	0.130594	0.0742704	0.227382	0.123967	0.0608776	0.388825	0.311412	0.290259	0.300188	0.247705	0.183572	0.307757	0.261712	0.182321	0.102195	0.0664061	0.539073	0.457859	0.431489	0.40425	0.363796	0.318004	0.411222	0.304473	0.23513	0.0917272	0.0532057	0.508855	0.421517	0.389113	0.364504	0.349726	0.329821	0.46043	0.326823	0.285537	0.257954	0.202033	0.0964753	0.338488	0.103565	0.111994	0.0812337	0.00854059	0.00132432	0.342675	0.266444
364	0.302301	0.195025	0.126311	0.0721507	0.209631	0.118734	0.0566579	0.355468	0.28531	0.271499	0.285756	0.237623	0.175128	0.282748	0.247262	0.174223	0.0992626	0.0639956	0.502323	0.428586	0.408342	0.386202	0.349836	0.30647	0.384258	0.289922	0.225645	0.0899228	0.0499357	0.470873	0.391452	0.363086	0.343128	0.330946	0.315114	0.425526	0.302613	0.268753	0.245518	0.193033	0.0913313	0.316758	0.0947101	0.105875	0.0776822	0.00648619	0.00164713	0.31633	0.248318
366	0.282795	0.186081	0.120797	0.0687918	0.194195	0.112281	0.0513582	0.324581	0.260181	0.252516	0.271481	0.22708	0.168473	0.259057	0.233886	0.166866	0.0962845	0.0624196	0.465736	0.401419	0.385741	0.368667	0.336145	0.292933	0.357972	0.276076	0.216463	0.0851623	0.0482134	0.434984	0.36285	0.337555	0.3221	0.313633	0.299936	0.392727	0.281087	0.253076	0.233218	0.184508	0.0882534	0.295524	0.0871243	0.0988699	0.0741339	0.00725831	0.00281109	0.289521	0.232474
368	0.265601	0.176313	0.113516	0.0657046	0.178675	0.105276	0.0496838	0.294572	0.239438	0.234856	0.257383	0.217874	0.16128	0.238453	0.220826	0.1591	0.0919878	0.0581341	0.432463	0.375167	0.366179	0.350918	0.3208	0.280871	0.332674	0.262648	0.207326	0.0831013	0.0465189	0.401754	0.334956	0.314634	0.301868	0.295485	0.284226	0.361668	0.260068	0.238425	0.220714	0.175714	0.0832673	0.274357	0.0782127	0.0930308	0.0698034	0.00637673	0.00212532	0.266808	0.216277
370	0.247302	0.166551	0.109582	0.0629518	0.165021	0.100999	0.0457351	0.266411	0.217729	0.218239	0.2442	0.207584	0.153391	0.216877	0.208944	0.152823	0.0880724	0.0558514	0.399172	0.350278	0.344675	0.333858	0.306061	0.268786	0.307887	0.247112	0.197698	0.0788298	0.0443877	0.369283	0.308794	0.291647	0.282661	0.279279	0.270201	0.331964	0.239325	0.22353	0.210229	0.167212	0.0795558	0.254083	0.071883	0.0879225	0.066678	0.00704628	0.00151483	0.244163	0.200754
372	0.229368	0.158807	0.102887	0.0589089	0.149502	0.0949654	0.0426413	0.240847	0.20007	0.202324	0.229932	0.197999	0.147164	0.198472	0.196433	0.145772	0.0844753	0.053551	0.367687	0.326066	0.325726	0.318025	0.292939	0.255701	0.284478	0.235083	0.189942	0.0770293	0.0414738	0.337973	0.283492	0.271488	0.264554	0.263908	0.256714	0.303315	0.221715	0.210695	0.199212	0.159887	0.0759478	0.235429	0.0641984	0.081507	0.0631043	0.00587675	0.00175986	0.223027	0.188477
374	0.213643	0.149934	0.0987013	0.0568446	0.136864	0.0892534	0.0400101	0.216694	0.180714	0.186749	0.217827	0.189021	0.140256	0.179435	0.186419	0.139469	0.0812189	0.051221	0.337331	0.302584	0.306715	0.301971	0.278953	0.245567	0.262687	0.222475	0.180248	0.0724062	0.0395558	0.307715	0.260052	0.250184	0.247295	0.2487	0.242347	0.276224	0.204319	0.19806	0.188732	0.151378	0.071407	0.216541	0.0597331	0.0760272	0.0598004	0.00565855	0.000352294	0.204028	0.174725
376	0.198476	0.142508	0.0941687	0.053195	0.125469	0.0852893	0.036429	0.194457	0.164328	0.173771	0.206409	0.180541	0.134053	0.16186	0.176192	0.13357	0.0782966	0.0485486	0.31007	0.282092	0.288876	0.28689	0.266144	0.234416	0.241091	0.210324	0.17336	0.0691104	0.0376828	0.283553	0.238884	0.23318	0.231877	0.233937	0.230314	0.250589	0.187599	0.185094	0.179304	0.144496	0.0678051	0.19917	0.0538878	0.0724535	0.0564815	0.00611403	0.0022634	0.184738	0.161174
378	0.183757	0.134858	0.088491	0.0514669	0.114498	0.080554	0.0325372	0.175356	0.148294	0.160093	0.194394	0.171488	0.126924	0.146898	0.166222	0.12705	0.0734836	0.0462239	0.284264	0.261643	0.272184	0.273388	0.253968	0.22341	0.221693	0.198536	0.1654	0.0672147	0.0355575	0.255944	0.21927	0.21574	0.216872	0.221509	0.21957	0.228729	0.173244	0.174302	0.170195	0.138201	0.0650432	0.183882	0.0490551	0.068307	0.0532622	0.00519751	0.00109608	0.168184	0.151375
380	0.169758	0.12804	0.0842165	0.0488077	0.102877	0.0765096	0.0310662	0.156797	0.134759	0.149149	0.18501	0.16272	0.121757	0.134092	0.157707	0.121357	0.0713553	0.04368	0.259541	0.242355	0.25758	0.259645	0.242918	0.213373	0.203899	0.188589	0.158741	0.0644036	0.0334369	0.234408	0.201832	0.200032	0.204016	0.209377	0.207825	0.207747	0.160456	0.163978	0.161795	0.130638	0.0622684	0.171137	0.0443927	0.0629451	0.051332	0.00480285	0.000437951	0.153092	0.141342
382	0.15735	0.121124	0.080831	0.0457575	0.0947584	0.0727528	0.0286029	0.141532	0.121404	0.137186	0.174619	0.155815	0.116149	0.120654	0.149032	0.116576	0.0684641	0.0405967	0.237711	0.227322	0.243659	0.24675	0.232565	0.203424	0.186657	0.179356	0.151408	0.0614831	0.0326422	0.214944	0.185457	0.185934	0.191545	0.198366	0.197332	0.188058	0.148285	0.154396	0.153182	0.12518	0.0578532	0.156101	0.0404583	0.0589853	0.0480537	0.00426838	0.00160402	0.138064	0.132266
384	0.144669	0.114399	0.0777946	0.0441629	0.0865874	0.0698318	0.0266417	0.128305	0.112191	0.12771	0.1664	0.148694	0.110972	0.109732	0.142333	0.111661	0.0654434	0.0396582	0.2187	0.212273	0.230788	0.236365	0.221729	0.195666	0.172841	0.171043	0.144193	0.0581972	0.0302939	0.196085	0.170916	0.173377	0.180496	0.187983	0.1883	0.172264	0.137676	0.146464	0.146172	0.120414	0.056568	0.144734	0.036719	0.0557442	0.0451594	0.00467856	0.000832953	0.126227	0.124048
386	0.135425	0.111491	0.0741357	0.0420158	0.0808207	0.0661594	0.0254302	0.117841	0.103982	0.11991	0.158333	0.142002	0.106454	0.101087	0.136435	0.108025	0.0635745	0.0374109	0.202838	0.200053	0.218492	0.225449	0.211958	0.186414	0.159415	0.162571	0.138864	0.0575239	0.0302755	0.182528	0.161035	0.163956	0.172095	0.17892	0.179571	0.158696	0.130356	0.140548	0.139543	0.114958	0.0535865	0.136453	0.0351646	0.0534586	0.0426825	0.00423673	0.00134651	0.118338	0.117279
388	0.124709	0.105808	0.0718439	0.0398136	0.0753448	0.0637179	0.0235537	0.109341	0.0980405	0.112782	0.149776	0.135435	0.101746	0.0943148	0.129687	0.10363	0.0602749	0.035146	0.188358	0.189992	0.208677	0.214922	0.202315	0.178008	0.148011	0.155368	0.13378	0.0552239	0.0282665	0.168571	0.150003	0.155696	0.163212	0.170433	0.173443	0.147764	0.122027	0.133082	0.133295	0.109167	0.0508427	0.127288	0.0328903	0.0500216	0.041162	0.00294498	0.00178771	0.108334	0.111907
390	0.116342	0.100825	0.0687579	0.0381518	0.0693618	0.0620255	0.0233149	0.102494	0.0922897	0.106222	0.143445	0.130021	0.0969399	0.0867905	0.125172	0.0992431	0.0590955	0.0340049	0.174831	0.178651	0.198669	0.204605	0.194384	0.17069	0.137625	0.146951	0.127566	0.0521292	0.0262857	0.157219	0.141925	0.147514	0.154856	0.163801	0.16442	0.137103	0.116467	0.127585	0.12747	0.105432	0.0488408	0.119262	0.0313593	0.0475849	0.0387992	0.00366236	0.00220932	0.100899	0.106321
392	0.109293	0.0964387	0.0664027	0.0366493	0.0653152	0.0592271	0.0225321	0.0941789	0.0862023	0.100467	0.135986	0.123982	0.0929983	0.081894	0.119507	0.0952979	0.0564248	0.0331766	0.161902	0.168824	0.189196	0.196408	0.185824	0.162773	0.127826	0.140645	0.122669	0.050618	0.0255402	0.145347	0.132524	0.139295	0.147777	0.155638	0.157584	0.126849	0.110031	0.12245	0.121464	0.0997108	0.0470272	0.110457	0.0300687	0.0449739	0.0370577	0.00330153	0.00190737	0.0940273	0.101271
394	0.101964	0.092718	0.0632195	0.03503	0.0611579	0.0579165	0.0219664	0.0876391	0.0803902	0.0950346	0.128966	0.118799	0.0878321	0.0748624	0.115106	0.0918083	0.0538867	0.0314247	0.151666	0.159832	0.179306	0.187844	0.176895	0.15567	0.119627	0.134826	0.117549	0.0483095	0.0238223	0.136311	0.125739	0.133726	0.140714	0.147903	0.150302	0.118856	0.10455	0.116809	0.117023	0.0964756	0.0450076	0.103789	0.0283982	0.0431918	0.0343791	0.0027696	0.00179725	0.0869206	0.0960313
396	0.0951653	0.0886226	0.0611163	0.0336571	0.0574832	0.0534122	0.0212103	0.0824233	0.0757716	0.0880423	0.122321	0.113629	0.0854814	0.071025	0.110889	0.0883981	0.0519497	0.029682	0.141238	0.15147	0.172571	0.179216	0.169226	0.148021	0.111257	0.12901	0.112669	0.0462578	0.0237781	0.126936	0.118272	0.125426	0.133847	0.141784	0.143918	0.110522	0.099063	0.110706	0.111135	0.0924881	0.0427024	0.0973252	0.0269761	0.0407273	0.0340721	0.00326183	0.00124157	0.0814282	0.0917003
398	0.0885627	0.0849779	0.0592541	0.0320841	0.0534574	0.0513535	0.0197247	0.0777566	0.0705835	0.0838712	0.116759	0.107494	0.0817039	0.0651665	0.106386	0.084996	0.0502357	0.0280403	0.131975	0.142832	0.164192	0.170909	0.162254	0.141872	0.104065	0.124026	0.108265	0.0449231	0.0221439	0.118222	0.112724	0.120436	0.128118	0.135843	0.138276	0.102826	0.0937375	0.106604	0.106056	0.0880466	0.0408276	0.0925156	0.0245229	0.0387712	0.0310657	0.0025846	7.03575e-05	0.0763618	0.0878609
400	0.081921	0.080412	0.0555361	0.0303944	0.0489837	0.0491531	0.0178415	0.0715863	0.066066	0.0781818	0.11077	0.102416	0.0770177	0.0603231	0.0999673	0.0810862	0.0477044	0.025668	0.119915	0.133644	0.154496	0.162392	0.153397	0.133844	0.0944044	0.117252	0.103382	0.0413718	0.0207823	0.108899	0.103292	0.112326	0.120031	0.128217	0.131187	0.093693	0.087719	0.0999987	0.100852	0.0835158	0.0385843	0.0845202	0.0242354	0.0365919	0.0296799	0.00245294	0.00129508	0.0699708	0.0813345
402	0.074237	0.0752742	0.0530809	0.0273095	0.0456088	0.0481338	0.0160354	0.0648656	0.0617734	0.073932	0.104442	0.0978325	0.074161	0.0551939	0.0949258	0.0773972	0.0438969	0.0255929	0.110346	0.12411	0.146563	0.154292	0.146403	0.127992	0.0877838	0.110221	0.0978692	0.0393988	0.0198528	0.0995882	0.0956199	0.104818	0.113304	0.121554	0.125447	0.0864206	0.0831791	0.095294	0.0967894	0.079371	0.0369847	0.0787224	0.0222506	0.0339505	0.0277921	0.00322724	0.00137324	0.0632509	0.0777977
404	0.0704948	0.0725989	0.0507116	0.0270343	0.0427081	0.0449267	0.0164464	0.0605518	0.0574831	0.0707189	0.0999518	0.0943338	0.0708914	0.0502072	0.0914094	0.0740898	0.0427003	0.0238948	0.102577	0.118113	0.1392	0.148093	0.13992	0.123181	0.0811368	0.105851	0.0937528	0.038005	0.0186584	0.0918934	0.0899088	0.0993565	0.108357	0.116606	0.119276	0.0809814	0.0788074	0.0916296	0.0930596	0.0774094	0.0363586	0.0739894	0.0205724	0.0323868	0.0261609	0.00194702	0.00134933	0.0585646	0.0735494
406	0.0654316	0.0693063	0.0490167	0.0260629	0.0397509	0.0444543	0.0151351	0.0561933	0.054388	0.0656211	0.0945828	0.0887892	0.0669137	0.0481577	0.0875929	0.0712975	0.0415491	0.0227897	0.0964843	0.112908	0.134116	0.141216	0.133724	0.117963	0.0764962	0.101892	0.0898266	0.0381782	0.0179024	0.0867756	0.0857804	0.0955796	0.103062	0.111658	0.114262	0.0752957	0.0751624	0.0871085	0.0885346	0.0736358	0.0332613	0.069661	0.0193841	0.031371	0.0245393	0.00232855	0.000263664	0.056822	0.0709545
408	0.0629055	0.0663922	0.0468977	0.0255352	0.0374811	0.0425533	0.0151049	0.0541719	0.0519699	0.0619304	0.0900637	0.0846024	0.064701	0.0455924	0.0845175	0.0687369	0.0396213	0.0222142	0.0908289	0.107895	0.128229	0.134275	0.127047	0.112397	0.0731497	0.0978428	0.0857107	0.0357872	0.0173025	0.08218	0.0820634	0.0912123	0.0995409	0.106272	0.109414	0.0716677	0.0721474	0.0824856	0.0848112	0.0707129	0.0317384	0.0675008	0.0179702	0.0300194	0.0240727	0.00157222	0.000747266	0.0526148	0.0675351
410	0.0602658	0.0637239	0.0459934	0.0250571	0.0377019	0.0412092	0.0155267	0.0509629	0.0505102	0.060726	0.0864954	0.0816939	0.0613497	0.0436551	0.0824652	0.0660543	0.0383905	0.0217983	0.0893429	0.103179	0.124177	0.129885	0.121755	0.106847	0.0684018	0.0938524	0.0829646	0.0347426	0.015874	0.0796757	0.0797099	0.0883064	0.0955404	0.102224	0.104514	0.0688181	0.0695548	0.0795911	0.0813441	0.0673565	0.031309	0.0650181	0.0187973	0.0278769	0.0234873	0.0035161	0.00138161	0.0502703	0.065789
412	0.0580696	0.0641385	0.0433253	0.0238224	0.0350329	0.0405266	0.0149752	0.0500477	0.0487342	0.0567885	0.0824222	0.0769692	0.0584643	0.0423064	0.0798781	0.0642618	0.036903	0.0204445	0.0839195	0.101407	0.117449	0.123443	0.116466	0.101966	0.0663669	0.0904302	0.0803211	0.0338214	0.0172522	0.0763964	0.0766994	0.0845372	0.0919289	0.0984483	0.0996119	0.0660084	0.0664196	0.0778857	0.078532	0.0650738	0.0291466	0.0631228	0.0168207	0.026467	0.0209972	0.00212409	-6.71619e-05	0.0493349	0.0637128
414	0.0585584	0.0602737	0.0427279	0.0223872	0.0348878	0.0389356	0.014255	0.0486389	0.0455416	0.0540261	0.0788045	0.0728863	0.0551082	0.0398634	0.0763613	0.0615776	0.0355437	0.0194146	0.0813673	0.0966107	0.1138	0.118616	0.110603	0.09686	0.065409	0.0871272	0.0762135	0.0316365	0.0148783	0.0740112	0.0740476	0.0815506	0.0881203	0.0935664	0.0957291	0.0638289	0.0652434	0.0747556	0.0739438	0.0618075	0.0286521	0.061908	0.0165553	0.0259164	0.0203051	0.00170722	0.000259304	0.0471723	0.0609415
416	0.0547161	0.0589392	0.0410454	0.0220341	0.0328972	0.0385353	0.0138641	0.0470846	0.0461694	0.0525836	0.0747988	0.0699444	0.0526012	0.0391227	0.0736597	0.0584683	0.0345939	0.0189453	0.0788778	0.0933342	0.108724	0.114168	0.106582	0.0924428	0.0626155	0.0845635	0.0740651	0.0304579	0.0146271	0.0718066	0.0717466	0.0792883	0.084289	0.0906692	0.0923252	0.0617693	0.0633482	0.0724515	0.0709466	0.0605561	0.0269239	0.0595012	0.0154781	0.0239206	0.0206364	0.00203336	0.00175496	0.0462654	0.059083
418	0.0525209	0.0560404	0.0401544	0.0211095	0.0316144	0.0367584	0.0145046	0.0444756	0.0420231	0.0496295	0.0711929	0.0663044	0.0509875	0.0365791	0.0717174	0.0557845	0.0328834	0.0183511	0.075068	0.0910603	0.105042	0.108517	0.101278	0.0883934	0.0609868	0.08186	0.070237	0.0300399	0.0136435	0.0684063	0.069815	0.0768547	0.0809938	0.0858467	0.0876268	0.0589315	0.0615356	0.0683543	0.0674399	0.057079	0.0258997	0.0574848	0.0148317	0.0224356	0.0180351	0.0020877	0.00169009	0.0449248	0.0570832
420	0.0509776	0.0549246	0.0386349	0.0198548	0.0311017	0.0351873	0.0137745	0.0437145	0.0414733	0.0473654	0.0664492	0.06316	0.0494458	0.0363296	0.0691645	0.053424	0.0313003	0.016437	0.0731673	0.0857206	0.0999063	0.103469	0.0970141	0.0837179	0.0575251	0.0769649	0.067921	0.029066	0.0145889	0.0659669	0.0667719	0.074097	0.0784527	0.0818877	0.0840682	0.0568461	0.0584006	0.0648649	0.0652013	0.0549029	0.0238069	0.0556851	0.0145991	0.0216704	0.0172287	0.0020902	0.00145066	0.043482	0.0548234
422	0.0498446	0.0519844	0.0382125	0.0195284	0.0302956	0.0348597	0.0138214	0.0418866	0.0398783	0.0448517	0.0643426	0.0598326	0.0456055	0.0342574	0.0666903	0.0514457	0.0309812	0.0159477	0.0714877	0.0828365	0.0962806	0.0985744	0.091887	0.0799739	0.0558606	0.074276	0.0659411	0.0288574	0.0141528	0.0634977	0.0631486	0.0708469	0.074505	0.0792422	0.0809238	0.0553334	0.055389	0.062859	0.060888	0.0522648	0.0234765	0.0542352	0.0147028	0.0200307	0.0164304	0.00144608	0.00023843	0.0413916	0.0538872
424	0.0470741	0.05063	0.0362364	0.0186903	0.0290521	0.032641	0.0137172	0.0399248	0.0381182	0.043892	0.0614863	0.0572863	0.0435136	0.0337521	0.0640034	0.0491558	0.0290144	0.0159769	0.0695489	0.0805214	0.0909552	0.0947256	0.087907	0.0763772	0.054133	0.0725133	0.0613892	0.0274493	0.0123185	0.0619054	0.0624676	0.0670228	0.0711588	0.0758154	0.0762486	0.0530174	0.0539811	0.0600989	0.0585414	0.049274	0.0217459	0.0528314	0.0133653	0.0192912	0.0151705	0.000856637	0.000473793	0.0401997	0.0514207
426	0.0454267	0.0479312	0.0348685	0.0184477	0.0282699	0.0317116	0.012797	0.0389791	0.0373602	0.0406033	0.0586532	0.0548492	0.0423484	0.0326009	0.0617275	0.0470547	0.0270822	0.014507	0.066466	0.076864	0.087332	0.0896573	0.0828404	0.0732074	0.0525075	0.0683156	0.0587846	0.0252555	0.0120883	0.0601954	0.0590415	0.065951	0.0684433	0.0724202	0.0736444	0.0512394	0.0523381	0.0575542	0.0561378	0.0481714	0.0210973	0.051163	0.0124129	0.0175947	0.0150333	0.000825856	0.00083946	0.038447	0.0497197
428	0.0440985	0.0465285	0.033083	0.0178021	0.0275132	0.0314415	0.0135285	0.0376932	0.0358442	0.0395931	0.0556348	0.0512412	0.0401946	0.0311539	0.0579918	0.0452078	0.0262891	0.0138147	0.0644831	0.0744245	0.0834688	0.0854735	0.0788084	0.0694554	0.050292	0.0654248	0.0562274	0.0252557	0.0119555	0.0573115	0.0579339	0.0621462	0.0660231	0.0685572	0.0693812	0.0477722	0.0499645	0.0544476	0.0543851	0.0449824	0.020325	0.049114	0.012411	0.0167199	0.0139579	0.00143612	0.000890433	0.0371401	0.0472533
430	0.0425917	0.043761	0.0303436	0.0174765	0.0254418	0.0289106	0.0129337	0.0370567	0.0355194	0.0384043	0.0523921	0.0483775	0.0377953	0.0297675	0.056384	0.0437006	0.0243884	0.0136666	0.0614321	0.0716629	0.0801524	0.0813663	0.0748067	0.0653242	0.0470376	0.0628585	0.0539082	0.024094	0.0116142	0.0547587	0.0554849	0.0606254	0.0621168	0.0661786	0.0666266	0.047235	0.0483342	0.0523699	0.0496972	0.0431696	0.0182829	0.0481108	0.012174	0.016468	0.0136781	0.000563542	0.00107417	0.0352569	0.0451877
432	0.0414033	0.0415092	0.0293509	0.0155922	0.0249811	0.028301	0.0117854	0.0339236	0.0331222	0.0363141	0.0496116	0.0457874	0.0358626	0.0282157	0.0525228	0.0408711	0.023314	0.0127688	0.0576404	0.0668425	0.07639	0.0771588	0.0706662	0.0612339	0.0456404	0.0587232	0.0504173	0.0230142	0.0105876	0.0529749	0.0522847	0.0576189	0.0583256	0.0622395	0.0623744	0.0449607	0.0458175	0.0498752	0.0484299	0.0411874	0.0168355	0.0457654	0.011593	0.0146092	0.0120108	0.00102101	0.00178115	0.0337413	0.0426217
434	0.0378731	0.0398241	0.0279811	0.0152079	0.0228362	0.0262478	0.0113374	0.0324551	0.0313677	0.0332235	0.0463598	0.0438134	0.0343531	0.0259499	0.049555	0.0376119	0.0229279	0.0129456	0.0531682	0.0619484	0.071845	0.0725554	0.0673308	0.0579938	0.0432272	0.0555209	0.0475366	0.0218258	0.00885204	0.0489035	0.0490291	0.0534139	0.0545647	0.0576056	0.0587368	0.0418577	0.0428288	0.046222	0.045293	0.0395417	0.0175766	0.0418189	0.0096142	0.0140831	0.0115218	0.000554929	-7.10353e-05	0.0307663	0.0403227
436	0.0352468	0.0367169	0.0266328	0.0136892	0.0218167	0.0249946	0.0104908	0.0305502	0.0284089	0.0318729	0.0438102	0.0408601	0.0312428	0.0241759	0.0471862	0.0355592	0.0204648	0.0109626	0.0504636	0.0583296	0.0671184	0.0678366	0.063	0.0546602	0.0400509	0.052576	0.0444383	0.0196829	0.00906864	0.0458501	0.0460647	0.0495066	0.0508592	0.0550803	0.0558341	0.0386697	0.0404417	0.0438201	0.0427713	0.0376638	0.0165162	0.0397598	0.0107779	0.0136991	0.0118038	0.0005864	0.00174618	0.0297	0.0376486
438	0.0344376	0.0345102	0.0244881	0.0139893	0.0210602	0.0233956	0.0105126	0.0288544	0.0278827	0.0305062	0.0409272	0.0375841	0.0299674	0.0235321	0.044384	0.031872	0.0195235	0.0108484	0.0485563	0.0566684	0.0624511	0.0650158	0.0588191	0.0518281	0.0387426	0.049174	0.0425183	0.0190397	0.00833363	0.0440498	0.0441004	0.0482151	0.0486483	0.0517162	0.0526433	0.0383491	0.0393691	0.0410712	0.0396753	0.0350558	0.0147534	0.0391246	0.00905733	0.013364	0.0109135	0.00120388	0.000572083	0.0278445	0.0364109
440	0.0349444	0.0347405	0.0241303	0.0134318	0.0212178	0.0238271	0.0100947	0.0297505	0.0281381	0.0298339	0.0391488	0.0363635	0.0282508	0.0241883	0.0440199	0.0320574	0.0182425	0.010565	0.0498842	0.0545125	0.0612681	0.0611496	0.0556136	0.0478566	0.0400333	0.0481833	0.0413897	0.0197413	0.00813534	0.0443773	0.04436	0.0483519	0.0479365	0.0500071	0.0500277	0.0383445	0.0383285	0.0405238	0.0371863	0.033185	0.013898	0.0381492	0.0088759	0.0116714	0.00967197	0.000702847	0.00131151	0.0281891	0.0350808
442	0.0348085	0.0341085	0.0229713	0.0133397	0.0221572	0.023387	0.0104313	0.0298779	0.0289148	0.0290028	0.0380894	0.0338879	0.0268654	0.0247323	0.0427795	0.0314514	0.0188129	0.010507	0.0508474	0.0563113	0.0601071	0.0596772	0.0526084	0.0459736	0.0406685	0.0470785	0.0390468	0.0185113	0.00850809	0.045951	0.0458337	0.04799	0.0457186	0.04861	0.0486334	0.0392504	0.0369162	0.0384385	0.0361185	0.0319186	0.012583	0.04103	0.00836894	0.0111631	0.00910515	0.00011902	0.00143146	0.0296979	0.0357197
444	0.0368275	0.0339638	0.0235287	0.0128374	0.0213812	0.0239729	0.0111713	0.030741	0.028629	0.0285508	0.0368117	0.0329879	0.0249921	0.025862	0.0429488	0.0296484	0.0180883	0.00905802	0.0526497	0.0572242	0.0592984	0.0566331	0.0506123	0.043738	0.041377	0.0466563	0.0375517	0.0191273	0.0101066	0.0475616	0.0471483	0.0478299	0.0466052	0.0465357	0.046766	0.0409625	0.0388204	0.0379114	0.0356434	0.0312543	0.0128138	0.0413363	0.00897948	0.0102051	0.00815403	0.000681299	0.00014853	0.0320273	0.0354838
446	0.0376559	0.0333338	0.0237643	0.0134467	0.0241808	0.0230897	0.011835	0.0327185	0.0281308	0.0286554	0.0340397	0.0305648	0.0237142	0.0267416	0.0427516	0.0287429	0.0176998	0.0106674	0.0552988	0.0575371	0.0582911	0.0551249	0.0477516	0.042003	0.0442136	0.0466966	0.0364834	0.0181304	0.00906404	0.0504503	0.0463655	0.0493317	0.0453917	0.0465226	0.0452362	0.0425738	0.0397775	0.0365025	0.0331653	0.0306302	0.0123064	0.0441475	0.00873895	0.00977593	0.00761136	0.000197885	0.000168943	0.0334126	0.0349217
448	0.0421114	0.0335361	0.0234094	0.013321	0.0262205	0.0235907	0.0127623	0.0354301	0.0315907	0.028887	0.0318256	0.0285115	0.0218113	0.0294926	0.0432078	0.0294461	0.01706	0.00967258	0.0621508	0.0592407	0.058069	0.0530697	0.0449051	0.0384879	0.0484305	0.0476343	0.035948	0.0189487	0.00859398	0.0554466	0.0507138	0.0496319	0.0451528	0.0455073	0.0424366	0.0479718	0.0413967	0.0367386	0.0321545	0.0281094	0.0109574	0.0469841	0.00878249	0.00969178	0.00639021	0.000832092	0.00121718	0.0347261	0.0372058
450	0.0461855	0.0346199	0.0237884	0.0135968	0.0292495	0.0236933	0.0138271	0.0399123	0.0349556	0.0288578	0.0305243	0.025921	0.0215345	0.0324317	0.043488	0.0263351	0.016593	0.00957665	0.0672601	0.0630388	0.058317	0.0503173	0.0422561	0.0355808	0.0541975	0.0463123	0.0345726	0.0175384	0.00924864	0.0612576	0.0549189	0.0529519	0.0456745	0.0435289	0.0406821	0.0514028	0.0428244	0.0356453	0.0296761	0.0276305	0.0101263	0.0517273	0.00895278	0.00870225	0.00676766	-0.00109107	0.00103166	0.0398126	0.0391689
452	0.0516775	0.0336531	0.0228831	0.0151555	0.0312293	0.0259122	0.0150968	0.0433308	0.0359741	0.0300414	0.0293203	0.0245077	0.0199097	0.0350108	0.0438451	0.0259859	0.0155674	0.00991048	0.0747601	0.0659292	0.0575335	0.0474717	0.0380814	0.0320751	0.0600321	0.0455392	0.0335836	0.0185068	0.00968825	0.0667354	0.0579069	0.0544021	0.0458038	0.0420013	0.0385956	0.0569641	0.0450387	0.0353532	0.0281923	0.0258454	0.0103389	0.0559764	0.00957694	0.00853906	0.00467487	0.000796005	0.000780272	0.0424741	0.0390922
454	0.0538962	0.0353399	0.0226187	0.0147049	0.0322741	0.0259553	0.0165932	0.0454652	0.037332	0.0312705	0.0271616	0.0199005	0.0170598	0.0374014	0.0433238	0.0246618	0.0169096	0.00945637	0.0785019	0.0669611	0.057285	0.0454988	0.0350333	0.0285794	0.0625505	0.0461222	0.0315678	0.0189041	0.00809444	0.0700077	0.0606437	0.0556565	0.0443142	0.0409662	0.0360565	0.0601131	0.0450741	0.0331435	0.0255211	0.0251304	0.010137	0.0578331	0.00957748	0.00634436	0.00343972	0.000423996	-0.000611489	0.0459617	0.0406992
456	0.0535781	0.0337516	0.0221667	0.0146278	0.0329085	0.0241008	0.0158033	0.0465431	0.0371275	0.0303995	0.0247729	0.0198194	0.0153188	0.0387872	0.0431081	0.0239404	0.0152377	0.00950965	0.0793186	0.0668123	0.0559745	0.0435554	0.0326627	0.026544	0.0633889	0.0446143	0.0293347	0.0181752	0.00907135	0.0701864	0.0597851	0.0552608	0.0439519	0.0389847	0.0353921	0.0609618	0.0462703	0.0327707	0.024123	0.0242206	0.00773217	0.0591597	0.00983991	0.00724961	0.00400375	-8.31129e-05	0.000824861	0.0462094	0.0399977
458	0.0533774	0.0323971	0.0213123	0.0140405	0.0321871	0.0255361	0.0164141	0.0453978	0.0371417	0.0285737	0.0247059	0.0179901	0.0147801	0.0384703	0.0407535	0.0223555	0.0139315	0.00964042	0.0779661	0.0652307	0.0538202	0.0409535	0.0295359	0.0250327	0.0622551	0.0439666	0.0283176	0.0174919	0.00860109	0.0708447	0.0602169	0.054042	0.0419354	0.036954	0.0330973	0.0617022	0.045373	0.0321222	0.0225578	0.0226893	0.00745155	0.0588445	0.00975825	0.00621227	0.00368507	-0.000150918	0.00139822	0.0453743	0.038808
460	0.0528648	0.0315679	0.0206408	0.0132342	0.0318977	0.0234541	0.0156866	0.0447694	0.0358293	0.0274502	0.022371	0.0161362	0.0139445	0.0368049	0.0406635	0.0225278	0.0144108	0.00865393	0.0764094	0.0631124	0.0503605	0.0382255	0.0276116	0.0229501	0.0606549	0.041576	0.0267701	0.01639	0.00915322	0.0685026	0.0578526	0.0531809	0.0405766	0.0359271	0.0307471	0.059424	0.0438133	0.0304491	0.022199	0.022317	0.00686552	0.05761	0.00932525	0.00565125	0.00320763	-0.000410009	0.00202341	0.0447636	0.0375324
462	0.0516532	0.0295841	0.0202005	0.0133915	0.0310615	0.023886	0.0164799	0.0438761	0.0353329	0.0275975	0.020455	0.0151389	0.0123637	0.0359873	0.0392832	0.0201883	0.0139221	0.00920435	0.0751727	0.0614254	0.0487627	0.0360978	0.0256223	0.0211615	0.0604671	0.0404254	0.025653	0.0164841	0.00813082	0.0688298	0.0569028	0.0508766	0.0391061	0.0340813	0.0289456	0.0590686	0.0427803	0.0282807	0.0202596	0.020165	0.00660541	0.0562102	0.00852617	0.00407449	0.00352238	-0.000129559	0.000775777	0.0432593	0.0373101
464	0.0495785	0.0296647	0.0192048	0.012753	0.0309101	0.0231257	0.0163411	0.0436352	0.0354256	0.026969	0.021549	0.0139628	0.0128606	0.0372384	0.038691	0.0197838	0.0125857	0.00898516	0.0747055	0.0596042	0.0473104	0.0343991	0.0249693	0.0202204	0.0582206	0.0399	0.0248753	0.0158561	0.00837191	0.0673503	0.0551586	0.0496666	0.0376405	0.0325932	0.0279915	0.0574101	0.0416295	0.0267575	0.0192556	0.0191242	0.00599879	0.0565238	0.00835921	0.00467413	0.00348228	0.000259105	0.000361918	0.0436224	0.0364549
466	0.0474995	0.0279823	0.018782	0.0120723	0.0297907	0.022122	0.016797	0.0407695	0.0341401	0.0260445	0.0193884	0.0147863	0.0112079	0.033745	0.0367991	0.0182579	0.0121699	0.00783466	0.0698578	0.0567877	0.0450047	0.0339637	0.023739	0.0199148	0.0542076	0.0382225	0.0243212	0.0153117	0.00760942	0.063636	0.0525821	0.0490605	0.0354224	0.0309506	0.0266468	0.0540996	0.0408642	0.0271742	0.019309	0.0193629	0.00676287	0.052959	0.00759067	0.00418696	0.00248526	-0.000590065	0.000954146	0.0404154	0.0343684
468	0.0429556	0.0258687	0.0162935	0.0114688	0.0249596	0.0215649	0.0151262	0.0364355	0.0308673	0.023379	0.0186387	0.0140019	0.0111899	0.0304006	0.0349912	0.0172658	0.0125766	0.00759381	0.0612425	0.0521587	0.0419689	0.0315258	0.0223405	0.0181697	0.0487196	0.0349374	0.0234727	0.0144014	0.00746932	0.0546784	0.0472116	0.0434668	0.0320926	0.0296024	0.0256649	0.0475146	0.0375993	0.026063	0.0191132	0.0193141	0.00633953	0.0472167	0.0067025	0.00275497	0.00272076	0.000827521	0.00134132	0.0366295	0.0317164
470	0.0392459	0.0237197	0.0155528	0.0107295	0.0236594	0.0210643	0.0140141	0.0336268	0.0292436	0.0224425	0.0181224	0.0136599	0.011345	0.0270243	0.0333363	0.016703	0.0112247	0.0073145	0.0564338	0.048296	0.0390825	0.0292738	0.0207457	0.0177242	0.0441361	0.0326069	0.0209164	0.0146956	0.00774034	0.0517207	0.0439346	0.0420229	0.0309897	0.0284387	0.0249503	0.0437813	0.0348587	0.0249806	0.0177287	0.0194648	0.0059135	0.0440451	0.00653618	0.00481796	0.00233651	0.000324822	0.000744734	0.0332535	0.0312249
472	0.0390008	0.0237732	0.0158704	0.0104689	0.0240826	0.0201813	0.0138763	0.0334559	0.0278829	0.0213076	0.0171691	0.012505	0.010839	0.0272801	0.0314582	0.0156347	0.0104343	0.00707961	0.055996	0.0469953	0.0390821	0.0284427	0.0202704	0.0167792	0.044001	0.0322748	0.0208531	0.0136529	0.00551076	0.0508656	0.0428436	0.0402787	0.0305967	0.0276776	0.0237427	0.0425335	0.0330434	0.0249212	0.0173024	0.0183692	0.00578815	0.0444574	0.00723796	0.00399336	0.00201043	-0.000183218	0.000832733	0.0330982	0.0293814
474	0.0392051	0.0234862	0.0162654	0.0109341	0.0227024	0.0194174	0.0128908	0.0331302	0.0274314	0.0207201	0.0167829	0.0131599	0.0107886	0.0271621	0.0312365	0.0155207	0.0103715	0.0065618	0.0557959	0.0472494	0.0388008	0.0289124	0.0220505	0.0173653	0.043593	0.0324858	0.021535	0.0124162	0.00613171	0.0511743	0.0437571	0.0404171	0.0314701	0.0274598	0.0236068	0.0426626	0.0342528	0.0235563	0.0174226	0.0183882	0.00577962	0.0437931	0.00696962	0.00364582	0.00223391	-0.000628138	0.00123569	0.0330215	0.029253
476	0.0397242	0.0234062	0.0164033	0.0102177	0.0239048	0.019483	0.0132073	0.0323556	0.0288096	0.0212144	0.01737	0.0121785	0.00965712	0.0272024	0.0320257	0.0164919	0.010247	0.0073859	0.0565287	0.0479977	0.0399772	0.0297778	0.0215787	0.0181846	0.0449933	0.0322637	0.0202055	0.0135616	0.00678157	0.0508445	0.0444535	0.039959	0.0291694	0.0270821	0.0241969	0.0440641	0.0336201	0.0232722	0.0181087	0.0171854	0.005353	0.0436878	0.00675126	0.00364119	0.0029046	0.000151517	0.000694934	0.0342708	0.0291687
478	0.0378663	0.0239573	0.0148957	0.0102579	0.0241284	0.0182496	0.013588	0.0334391	0.0274102	0.0211882	0.0166777	0.0125352	0.00965725	0.0263464	0.0308883	0.0164943	0.00990884	0.00617253	0.0556469	0.0465722	0.0374334	0.0287965	0.0196202	0.0170878	0.0434727	0.0314099	0.021669	0.0131969	0.00641603	0.0502345	0.04381	0.0389994	0.0300575	0.0259068	0.0228677	0.0429149	0.0335158	0.0226508	0.0165897	0.0174248	0.00510194	0.0435519	0.00570697	0.0042876	0.00229513	-0.00020327	0.00063036	0.0322984	0.0280074
480	0.0359413	0.0223409	0.0152955	0.0104085	0.0211687	0.0175533	0.0113208	0.0305923	0.0256846	0.0194182	0.016342	0.0114132	0.011021	0.0248897	0.0301558	0.0160267	0.00991897	0.00672352	0.0518995	0.0446687	0.0362796	0.0283973	0.0203153	0.0168938	0.0420028	0.0302265	0.0204045	0.0127832	0.00629425	0.0466309	0.0405535	0.0375166	0.0285324	0.0260818	0.0221306	0.0402656	0.0310277	0.0221116	0.0155331	0.015881	0.00549752	0.040653	0.00613377	0.00323987	0.0021484	0.000592128	0.00056154	0.0306535	0.0275438
482	0.0348026	0.0213297	0.0147468	0.00950142	0.0210878	0.0177912	0.0117623	0.0283703	0.0241906	0.0182731	0.0156474	0.012543	0.0101814	0.0240603	0.0287516	0.0143976	0.00985368	0.00664358	0.0498196	0.0431512	0.0366945	0.0263301	0.0199395	0.0161275	0.0396764	0.0287936	0.0195864	0.0115007	0.00603398	0.045929	0.0388604	0.0350492	0.0272583	0.0246881	0.0217646	0.0392908	0.0294742	0.0215495	0.0157343	0.0152467	0.00630143	0.0387903	0.00654565	0.00364758	0.00134862	-0.000706283	0.00150895	0.0289819	0.025465
484	0.0351811	0.0220272	0.0146127	0.00922954	0.0204708	0.0164328	0.0112556	0.029387	0.0233958	0.0183209	0.0146519	0.011525	0.00960619	0.0238549	0.0283033	0.0144416	0.0100969	0.00533065	0.0488254	0.0422	0.0366506	0.0271505	0.0192189	0.0161428	0.0399188	0.0285593	0.0193385	0.0113332	0.00541995	0.0445517	0.0387019	0.0353983	0.0283493	0.0246654	0.0220017	0.0381014	0.0289642	0.0213624	0.0148945	0.0156642	0.00590222	0.0384282	0.00557684	0.00358495	0.00156275	-9.07207e-07	0.000128613	0.0287339	0.0251929
486	0.0336508	0.0222207	0.014387	0.0095939	0.0216981	0.0165272	0.0116035	0.0291525	0.023902	0.0176176	0.0150675	0.0110596	0.00897602	0.0240936	0.0277846	0.0141799	0.00821721	0.00569001	0.0492396	0.0419138	0.0343751	0.0246442	0.018528	0.0159083	0.0389322	0.0288179	0.018793	0.0121506	0.00517496	0.0445879	0.0386497	0.035217	0.0267358	0.023059	0.02092	0.0383638	0.0297432	0.020293	0.0152285	0.0154662	0.0050342	0.0380862	0.00656216	0.00424022	0.00199838	0.000148478	0.00154146	0.0284631	0.0249586
488	0.0338664	0.0215212	0.0149504	0.00825868	0.0206449	0.0168004	0.0108435	0.0292677	0.0242258	0.0181542	0.0152081	0.0103726	0.00973324	0.0235242	0.0268559	0.013163	0.00933703	0.00560173	0.0487111	0.0417029	0.0337969	0.0253789	0.0191016	0.0143883	0.0384251	0.0278756	0.0181332	0.011753	0.00577204	0.0442172	0.0376213	0.0350001	0.0263977	0.0239795	0.0208412	0.0386901	0.0284058	0.0202327	0.0144032	0.0144092	0.00489456	0.0380039	0.00619418	0.00302342	0.00188967	-0.000273672	0.00105466	0.0283441	0.0253684
490	0.0328871	0.0208785	0.013448	0.00843251	0.0209816	0.0168303	0.00993013	0.0284552	0.0233605	0.0175753	0.0133544	0.0098046	0.00884047	0.0238337	0.0271392	0.0134908	0.0084323	0.00598162	0.0493681	0.0404228	0.0326537	0.0253033	0.0172257	0.0142917	0.0392398	0.026815	0.0176148	0.0107102	0.00501181	0.043621	0.0385458	0.0341793	0.0257275	0.0230421	0.020751	0.0371253	0.0283829	0.0193249	0.015279	0.0138946	0.00446055	0.0387404	0.00581005	0.00284709	0.00187191	-0.000133393	0.000304495	0.0282361	0.0248633
492	0.0332068	0.0206156	0.0131807	0.00857595	0.0207656	0.0164813	0.0111315	0.0287083	0.0239473	0.0174989	0.0143583	0.0104955	0.00855071	0.0231329	0.026586	0.0138596	0.00871414	0.00589076	0.0493273	0.0404258	0.0328729	0.0235925	0.0178181	0.0142402	0.0383919	0.0265345	0.0177848	0.00990319	0.00516654	0.0440645	0.0364375	0.0339882	0.024929	0.0226429	0.0203009	0.0378381	0.0287335	0.0204264	0.0140174	0.0149713	0.00466179	0.0381328	0.00575691	0.00301263	0.00186718	-0.000118271	0.000521165	0.028485	0.0245337
494	0.0338188	0.0206094	0.0133342	0.00946564	0.0216985	0.0163958	0.0108758	0.0282465	0.0243773	0.0175466	0.0139309	0.0101875	0.00793164	0.0236836	0.0261952	0.0126336	0.00743624	0.00482317	0.0489467	0.0393799	0.0322149	0.0234904	0.0162892	0.0150278	0.0387735	0.0258862	0.0172803	0.0100303	0.00560704	0.0432949	0.0356978	0.0339215	0.0253726	0.0219108	0.0190003	0.0378023	0.0277265	0.0197726	0.0143846	0.0140004	0.00486795	0.0381033	0.00608456	0.0028471	0.00236553	0.000147382	0.000620303	0.0278504	0.0242075
496	0.0337424	0.0200727	0.0126578	0.00872307	0.0202995	0.0153408	0.0114752	0.0289651	0.0230458	0.0178471	0.0140805	0.00876726	0.00781446	0.0232457	0.0252153	0.0128309	0.00842091	0.00548878	0.0496231	0.0396598	0.0316771	0.0226159	0.0173775	0.0137757	0.0381419	0.0257793	0.0168543	0.0108049	0.00481798	0.044148	0.036625	0.0328366	0.0247736	0.0216171	0.0190884	0.0369497	0.0285137	0.0202387	0.0143718	0.0139565	0.00386531	0.0375538	0.00530648	0.00230655	0.00104138	-1.65425e-05	0.000979688	0.0283922	0.0236144
498	0.0335554	0.0187741	0.0125681	0.00852338	0.0212885	0.0152605	0.0107124	0.0281735	0.0235988	0.0180326	0.0128026	0.0102309	0.00705481	0.023185	0.0251121	0.0126364	0.00809383	0.00524811	0.0489196	0.0390213	0.0310059	0.0223957	0.0160439	0.0132821	0.0382324	0.0257221	0.0158116	0.0109697	0.00411704	0.0433922	0.0366382	0.0335315	0.0243446	0.021815	0.0183506	0.0377785	0.0278878	0.0185467	0.0138582	0.0130633	0.00386605	0.0377947	0.00549272	0.00373638	0.00148589	-0.000394386	0.000543234	0.0278665	0.0242437
500	0.0333936	0.0192552	0.011333	0.00782815	0.0194989	0.0160362	0.0115644	0.0284665	0.0233154	0.0182605	0.0131669	0.00913036	0.00782794	0.0222798	0.0254527	0.0124398	0.00743588	0.00399956	0.0486009	0.0397035	0.0294942	0.0227574	0.0158079	0.0123605	0.0388301	0.0245229	0.0157984	0.00974133	0.00509581	0.0423025	0.0366174	0.0325136	0.0238074	0.0205917	0.0183525	0.0371612	0.0274203	0.0183871	0.0136635	0.0140717	0.00400535	0.0363814	0.00530594	0.00285447	0.00083597	-0.000207482	-0.000358569	0.0277974	0.0235983
502	0.0337485	0.0180969	0.0126846	0.00841255	0.020276	0.0160362	0.0117183	0.0281034	0.023203	0.0169715	0.0126723	0.00891916	0.00820104	0.0223552	0.0238612	0.0110293	0.00816	0.00439916	0.0483136	0.0383528	0.0298875	0.0208928	0.0156796	0.0135337	0.0378927	0.0240145	0.0164019	0.010081	0.00456529	0.0425995	0.0364909	0.0321335	0.0237396	0.0211315	0.0177501	0.0375941	0.0276552	0.0189819	0.0125651	0.0132023	0.00364287	0.0380895	0.00543463	0.0037624	0.00121805	0.0008294	0.000699942	0.0279461	0.0227052
504
506
508
510
512
514
516
518
520
522
[truncated: 84 more columns]

## Sheet: Basic Data
Wavelength	0	60	120	0	60	120	0	60	120	180	240	0	60	120	180	240	0	60	120	180	0	60	120	180	200	0	60	120	180	210	0	60	120	180	230	0	60	120	180	230	0	60	120	180	220	0	60	120	180
250	0.719102	1.76593	1.07605	0.496784	0.828182	0.527885	1.12299	2.03306	1.77788	1.39573	1.34923	0.899244	1.43336	1.10601	0.643417	0.565051	1.12546	1.57843	1.56565	1.00725	1.22905	1.61258	1.65978	2.15191	1.43045	1.22543	1.79105	2.27083	1.89054	1.62272	0.746418	0.871915	1.10745	1.27621	1.17291	0.958086	1.63852	1.8959	1.3177	1.24025	1.26288	2.12173	2.59459	1.87119	1.69466	1.12301	1.55398	1.74809	1.39066
252	0.679225	1.63813	0.99133	0.467736	0.767798	0.483555	1.05683	1.89357	1.6557	1.29503	1.24734	0.848431	1.33053	1.01773	0.585576	0.51417	1.06181	1.46384	1.44608	0.919453	1.15795	1.51185	1.55038	1.99635	1.32244	1.15576	1.66911	2.10978	1.74993	1.49491	0.703653	0.820593	1.03376	1.18756	1.08854	0.902505	1.52781	1.75838	1.21284	1.13852	1.19157	1.97424	2.40287	1.72258	1.55667	1.05968	1.44923	1.62228	1.28166
254	0.642677	1.52304	0.91558	0.443347	0.713394	0.444202	1.00275	1.77151	1.54709	1.20221	1.15473	0.803811	1.23695	0.936875	0.530196	0.464532	1.00551	1.35949	1.3357	0.837211	1.09784	1.42267	1.4518	1.8556	1.22281	1.09482	1.56205	1.96549	1.62184	1.37697	0.666383	0.7741	0.968099	1.10681	1.01181	0.855662	1.42621	1.63327	1.11625	1.0452	1.12777	1.84294	2.22843	1.58678	1.42955	1.0019	1.35449	1.50779	1.18042
256	0.608353	1.41568	0.843341	0.423522	0.663621	0.408403	0.956722	1.662	1.44859	1.12073	1.07272	0.763434	1.15429	0.863042	0.481164	0.422352	0.95192	1.26403	1.23427	0.761151	1.04466	1.34194	1.36276	1.72584	1.13118	1.0417	1.46448	1.83396	1.50584	1.2703	0.635823	0.733383	0.908609	1.03312	0.941395	0.813074	1.3357	1.51974	1.027	0.958572	1.07432	1.72302	2.06841	1.463	1.31438	0.949278	1.26592	1.40105	1.08781
258	0.574773	1.31761	0.776609	0.405365	0.618748	0.373803	0.915827	1.56232	1.35926	1.04497	0.993804	0.728043	1.07354	0.792021	0.432847	0.380684	0.90255	1.17359	1.13695	0.689299	0.995113	1.26786	1.27921	1.60632	1.04434	0.991351	1.37454	1.7131	1.39645	1.16897	0.605712	0.695252	0.853243	0.964492	0.876198	0.773549	1.25109	1.41376	0.944693	0.87975	1.02215	1.61442	1.92293	1.34559	1.20493	0.898085	1.18356	1.30301	0.998998
260	0.54591	1.22485	0.713963	0.385038	0.574565	0.340933	0.876558	1.46891	1.27275	0.971055	0.921359	0.692522	0.999755	0.726396	0.38863	0.341162	0.853844	1.08702	1.04574	0.620164	0.948268	1.19711	1.19894	1.49251	0.963637	0.94463	1.28875	1.59847	1.29247	1.07382	0.577248	0.65841	0.800965	0.900685	0.813526	0.736508	1.17105	1.31386	0.867725	0.802656	0.973066	1.51124	1.78201	1.23523	1.10193	0.852419	1.1074	1.21039	0.916419
262	0.519098	1.14524	0.657505	0.370164	0.537526	0.31086	0.839545	1.38276	1.19115	0.902239	0.849672	0.663479	0.92994	0.665056	0.346134	0.304072	0.815604	1.01073	0.960978	0.556265	0.906964	1.13398	1.12676	1.38983	0.889439	0.90446	1.21397	1.49298	1.19895	0.987945	0.553706	0.625521	0.752509	0.841426	0.757468	0.70378	1.0991	1.22393	0.796312	0.733469	0.930339	1.41638	1.65373	1.13439	1.00631	0.812835	1.04012	1.12901	0.842736
264	0.50211	1.07598	0.605464	0.35619	0.500022	0.284385	0.80765	1.30343	1.11281	0.836777	0.784645	0.639055	0.864809	0.608419	0.306431	0.270202	0.788003	0.94284	0.883701	0.499089	0.874494	1.07786	1.06307	1.29559	0.824355	0.871099	1.14399	1.39374	1.11316	0.909368	0.532065	0.597035	0.708247	0.787311	0.707616	0.67884	1.03279	1.13949	0.731298	0.669348	0.896457	1.32798	1.53309	1.03904	0.918337	0.785419	0.982748	1.05821	0.777001
266	0.495361	1.02085	0.561495	0.34491	0.470246	0.260561	0.781458	1.23691	1.0441	0.778584	0.726009	0.623284	0.809926	0.557724	0.271559	0.238935	0.775284	0.888771	0.816487	0.447975	0.851907	1.0347	1.00859	1.2191	0.770317	0.848712	1.08792	1.31031	1.03723	0.84238	0.515538	0.574409	0.672025	0.742957	0.664393	0.662753	0.977867	1.06828	0.676232	0.614792	0.874486	1.25371	1.42915	0.954238	0.841013	0.773311	0.940614	1.00105	0.725471
268	0.496468	0.976563	0.522211	0.335891	0.444965	0.240178	0.760839	1.17738	0.979811	0.724834	0.672613	0.613616	0.758054	0.512934	0.241754	0.212582	0.776197	0.845611	0.759483	0.40293	0.838758	1.00054	0.964859	1.15518	0.726538	0.834444	1.0383	1.23508	0.973959	0.785531	0.5046	0.558055	0.64158	0.704272	0.629435	0.653394	0.93074	1.00394	0.628007	0.565801	0.861788	1.18807	1.33559	0.880284	0.772462	0.773655	0.909641	0.955775	0.680838
270	0.503356	0.943723	0.488956	0.328974	0.422121	0.220911	0.742648	1.12592	0.921372	0.676688	0.624127	0.608662	0.714143	0.472449	0.211327	0.187081	0.785319	0.810261	0.709232	0.362684	0.831242	0.976584	0.927678	1.10218	0.689854	0.82767	0.999698	1.16905	0.919063	0.736114	0.496423	0.542878	0.6142	0.672063	0.598995	0.651174	0.889617	0.951538	0.585099	0.52408	0.854899	1.13175	1.25498	0.811703	0.710584	0.783153	0.889775	0.921451	0.646261
272	0.515573	0.919749	0.460759	0.324853	0.403569	0.205794	0.724932	1.08395	0.872563	0.634084	0.581239	0.608845	0.67872	0.437843	0.184869	0.164448	0.800905	0.784431	0.670091	0.328065	0.829374	0.959007	0.900403	1.06082	0.661032	0.825886	0.969406	1.11611	0.87466	0.696787	0.490507	0.534441	0.594789	0.647727	0.575624	0.65305	0.858671	0.906304	0.550229	0.487475	0.855402	1.08671	1.18655	0.754666	0.658065	0.799297	0.876838	0.89404	0.618343
274	0.528542	0.902973	0.43859	0.321284	0.389296	0.193463	0.715841	1.05	0.833144	0.599712	0.546354	0.610758	0.648041	0.410972	0.163322	0.145514	0.820481	0.765027	0.637266	0.298767	0.830871	0.947908	0.878677	1.02894	0.640432	0.827073	0.944198	1.07347	0.837667	0.662791	0.487302	0.528633	0.578242	0.627114	0.555409	0.657771	0.832705	0.870513	0.520081	0.457275	0.858096	1.04969	1.13138	0.707671	0.613673	0.818298	0.869522	0.875145	0.597668
276	0.540866	0.888138	0.418768	0.318869	0.377225	0.181983	0.706186	1.02006	0.797021	0.569836	0.515545	0.61395	0.622708	0.385568	0.144142	0.127282	0.837854	0.749066	0.610089	0.272588	0.833326	0.938654	0.861459	1.00353	0.619628	0.829696	0.925562	1.03768	0.808323	0.634153	0.486127	0.524819	0.565511	0.611788	0.541558	0.66265	0.81109	0.839993	0.493967	0.431063	0.861603	1.01954	1.08459	0.665639	0.575496	0.835811	0.863928	0.858728	0.578618
278	0.550822	0.873736	0.402318	0.317531	0.365316	0.172211	0.697909	0.994401	0.767267	0.544855	0.488679	0.615378	0.600473	0.363263	0.127186	0.112525	0.852512	0.736392	0.587609	0.252334	0.834881	0.930584	0.846732	0.978995	0.603708	0.832031	0.907326	1.0058	0.780513	0.609026	0.483705	0.520915	0.552921	0.59654	0.527065	0.665532	0.793701	0.814036	0.472	0.406826	0.864656	0.99192	1.04353	0.630906	0.54293	0.850717	0.859016	0.843449	0.563924
280	0.5574	0.859899	0.387605	0.314442	0.355723	0.164118	0.690343	0.971397	0.742906	0.52303	0.465386	0.616306	0.581851	0.344573	0.111581	0.0985271	0.862494	0.723258	0.567092	0.234135	0.834574	0.923623	0.832618	0.956313	0.587223	0.831844	0.890291	0.976933	0.756416	0.586151	0.481846	0.515881	0.542652	0.582932	0.514942	0.667853	0.776903	0.790508	0.451382	0.387154	0.863973	0.967625	1.00737	0.598479	0.513021	0.859616	0.852573	0.830024	0.548318
282	0.559679	0.846635	0.374943	0.312387	0.348154	0.156482	0.684065	0.953696	0.722362	0.503849	0.445341	0.615019	0.565509	0.328069	0.0977384	0.0863503	0.865174	0.709875	0.54955	0.217435	0.832203	0.913224	0.819592	0.934022	0.571194	0.828518	0.876398	0.952776	0.734908	0.564373	0.478647	0.512594	0.53275	0.572309	0.500793	0.667709	0.761963	0.76962	0.433617	0.368576	0.862925	0.948048	0.978199	0.571381	0.48716	0.863303	0.844717	0.815195	0.531972
284	0.557455	0.832045	0.362416	0.309738	0.339688	0.148546	0.675934	0.935739	0.704076	0.487542	0.428225	0.611058	0.551071	0.313464	0.0858814	0.0763011	0.861612	0.695048	0.532662	0.201221	0.826515	0.901878	0.805234	0.914315	0.555174	0.822493	0.861453	0.931381	0.713551	0.544701	0.473494	0.505518	0.523702	0.559007	0.489249	0.66213	0.747759	0.751413	0.417144	0.351734	0.855901	0.929194	0.951031	0.547341	0.463861	0.85949	0.831484	0.799625	0.516545
286	0.550973	0.816257	0.351609	0.305347	0.331468	0.142585	0.667427	0.917391	0.689343	0.474077	0.413144	0.602369	0.537298	0.300429	0.0758234	0.0664421	0.851498	0.679779	0.516362	0.188651	0.814542	0.888425	0.790613	0.892965	0.53834	0.810256	0.844568	0.91142	0.694544	0.525986	0.467996	0.499401	0.514213	0.546195	0.47849	0.654324	0.734215	0.733936	0.402305	0.33678	0.844417	0.91049	0.926034	0.527215	0.444031	0.848917	0.817312	0.78347	0.501574
288	0.539622	0.796296	0.340753	0.298309	0.324385	0.136809	0.654668	0.898566	0.672859	0.459518	0.398851	0.589662	0.524258	0.289038	0.067419	0.0594808	0.833651	0.662042	0.501015	0.176255	0.797548	0.870541	0.773196	0.86937	0.520312	0.794902	0.82594	0.891325	0.674707	0.507187	0.458339	0.489146	0.502839	0.532708	0.465834	0.640875	0.717663	0.715954	0.387556	0.323369	0.827882	0.888989	0.902558	0.507974	0.425693	0.832357	0.798803	0.762756	0.484212
290	0.52309	0.775424	0.330092	0.291099	0.314974	0.132159	0.637405	0.875696	0.656913	0.445671	0.383506	0.573351	0.509666	0.277229	0.0598989	0.0534954	0.80683	0.640452	0.483017	0.166464	0.775398	0.846977	0.751091	0.843871	0.499576	0.772118	0.804356	0.867846	0.653585	0.487285	0.446131	0.475579	0.488497	0.518191	0.452398	0.622633	0.699475	0.696964	0.37319	0.309292	0.803445	0.865375	0.877596	0.48978	0.408492	0.805585	0.77464	0.740416	0.465765
292	0.500152	0.750154	0.319138	0.279944	0.306487	0.126054	0.615251	0.848644	0.63708	0.42985	0.369541	0.551315	0.493428	0.265207	0.0535911	0.0468958	0.774587	0.616601	0.465199	0.15659	0.744875	0.817593	0.726472	0.815137	0.478858	0.741756	0.778328	0.843298	0.631522	0.468446	0.429232	0.458961	0.473435	0.500595	0.434941	0.59863	0.679135	0.67538	0.358548	0.297495	0.773059	0.839405	0.851533	0.471801	0.39165	0.771336	0.746772	0.714361	0.445974
294	0.474453	0.723694	0.308661	0.266777	0.29587	0.121782	0.587855	0.818605	0.616016	0.413804	0.354228	0.526651	0.475191	0.255258	0.0494361	0.0422294	0.734847	0.588496	0.44699	0.148605	0.709512	0.782991	0.698432	0.782728	0.456558	0.704997	0.748207	0.815722	0.607021	0.447795	0.409341	0.439125	0.454831	0.480667	0.4188	0.569348	0.653975	0.653562	0.344527	0.284245	0.734882	0.810028	0.82481	0.454584	0.375601	0.732361	0.714205	0.685624	0.424438
296	0.44664	0.696903	0.297158	0.253828	0.28691	0.116913	0.557441	0.78742	0.594296	0.400378	0.339692	0.495955	0.459827	0.244397	0.0451248	0.0378895	0.691171	0.560366	0.428966	0.140867	0.670653	0.747376	0.667692	0.751692	0.434605	0.667006	0.7185	0.789303	0.585925	0.428497	0.388237	0.41791	0.436149	0.461669	0.401965	0.537645	0.631384	0.63241	0.330636	0.273828	0.695421	0.780665	0.80035	0.439081	0.362328	0.68849	0.681093	0.657304	0.405704
298	0.41583	0.66941	0.28764	0.239329	0.276622	0.112928	0.527625	0.756405	0.573947	0.384069	0.326262	0.466326	0.441778	0.234321	0.0398102	0.0341683	0.646019	0.53134	0.410652	0.133739	0.630416	0.709574	0.638139	0.720243	0.410253	0.627546	0.687788	0.76213	0.561857	0.409162	0.365631	0.396369	0.418039	0.442061	0.384868	0.504381	0.606303	0.611789	0.318942	0.261925	0.652641	0.749879	0.774616	0.424596	0.349551	0.642858	0.645313	0.627633	0.384246
300	0.385124	0.64221	0.278921	0.22515	0.268659	0.10854	0.495772	0.725934	0.554085	0.369252	0.311361	0.435648	0.425565	0.226034	0.0384386	0.0298703	0.598936	0.503983	0.39307	0.128356	0.589322	0.671347	0.607605	0.688419	0.388085	0.586949	0.656805	0.736338	0.540422	0.391979	0.342784	0.373744	0.399789	0.423115	0.367963	0.470484	0.582293	0.590176	0.30504	0.25266	0.61015	0.721249	0.74799	0.411401	0.336869	0.59762	0.610177	0.598097	0.36411
302	0.355662	0.61491	0.26904	0.21127	0.2584	0.105063	0.466584	0.695177	0.53411	0.355383	0.299809	0.405949	0.409991	0.218042	0.0347491	0.0285779	0.552813	0.475443	0.375818	0.12136	0.548704	0.634047	0.578714	0.657089	0.366905	0.545948	0.625621	0.710064	0.51942	0.374864	0.321012	0.352162	0.38096	0.403545	0.351073	0.438489	0.558015	0.569624	0.293219	0.241648	0.568578	0.691083	0.723687	0.398737	0.324268	0.552549	0.575806	0.569393	0.343968
304	0.327271	0.587266	0.258916	0.19718	0.250047	0.101172	0.438969	0.66572	0.514962	0.341675	0.287223	0.377791	0.394391	0.208826	0.0320177	0.026674	0.508769	0.448805	0.359026	0.115402	0.509311	0.598039	0.550807	0.627894	0.344381	0.507415	0.596486	0.686419	0.49857	0.35649	0.29873	0.332463	0.36397	0.386195	0.335836	0.406769	0.535768	0.549145	0.281201	0.232181	0.528322	0.663217	0.701004	0.385791	0.313751	0.50797	0.541558	0.540283	0.324747
306	0.299892	0.563909	0.25167	0.186067	0.241641	0.0978359	0.415178	0.642617	0.500173	0.330731	0.276559	0.352924	0.380736	0.20165	0.0302744	0.0235902	0.46843	0.423929	0.344505	0.109229	0.476826	0.568989	0.526602	0.601717	0.325584	0.473606	0.572298	0.666601	0.480309	0.341911	0.282124	0.313986	0.348508	0.370054	0.321226	0.378742	0.515824	0.532031	0.271109	0.223572	0.492463	0.638785	0.681517	0.375141	0.303149	0.468006	0.510837	0.515457	0.308244
308	0.276228	0.541981	0.243313	0.176562	0.233704	0.0944176	0.39731	0.6218	0.488504	0.322615	0.2698	0.331488	0.36942	0.194917	0.0281607	0.021735	0.434022	0.401625	0.330006	0.104288	0.448338	0.54173	0.505557	0.57739	0.307439	0.445062	0.550204	0.647179	0.46311	0.327273	0.26627	0.299315	0.336364	0.35561	0.308335	0.354851	0.498576	0.517249	0.261844	0.21559	0.462707	0.619968	0.662585	0.365013	0.29351	0.432071	0.484831	0.492399	0.290957
310	0.256915	0.520793	0.236131	0.170227	0.228343	0.0918025	0.384257	0.606709	0.478526	0.315646	0.263827	0.313604	0.360931	0.188544	0.0243605	0.0198098	0.40307	0.383123	0.317947	0.0980773	0.425615	0.520926	0.487822	0.556446	0.294016	0.424964	0.531561	0.631317	0.449214	0.31476	0.256439	0.287519	0.325808	0.343995	0.298711	0.335879	0.484938	0.503495	0.252672	0.209145	0.438944	0.601046	0.647217	0.355259	0.285631	0.401192	0.461436	0.471938	0.275151
312	0.240531	0.504282	0.23038	0.165785	0.223357	0.0893802	0.376146	0.595395	0.474726	0.312234	0.259547	0.300881	0.35372	0.184743	0.0242341	0.0193087	0.378659	0.368861	0.307777	0.0943128	0.410018	0.504418	0.47443	0.540466	0.281151	0.407824	0.520267	0.620493	0.438298	0.305647	0.247325	0.280109	0.317331	0.334423	0.289698	0.321797	0.475111	0.493425	0.245915	0.20359	0.421028	0.590283	0.63648	0.350305	0.278919	0.377069	0.441609	0.455672	0.263077
314	0.226591	0.486829	0.223611	0.162426	0.219305	0.0861233	0.37225	0.587752	0.471593	0.310328	0.257303	0.292101	0.348679	0.180637	0.0235206	0.0175994	0.358212	0.354711	0.299704	0.0907206	0.397915	0.492656	0.46436	0.526872	0.271336	0.394734	0.509118	0.610441	0.427763	0.296191	0.243012	0.273599	0.311084	0.328498	0.283459	0.309997	0.466079	0.48418	0.238976	0.197085	0.408291	0.580709	0.624482	0.344475	0.273133	0.355891	0.424958	0.441108	0.251933
316	0.215983	0.473479	0.218912	0.162253	0.215783	0.0845894	0.373596	0.58419	0.471965	0.308249	0.257152	0.286284	0.345243	0.177554	0.0214205	0.0174859	0.341915	0.343094	0.290627	0.0849112	0.391338	0.484676	0.457838	0.514221	0.2615	0.38773	0.502273	0.604998	0.420958	0.28847	0.241093	0.270012	0.309258	0.324237	0.27779	0.303438	0.460071	0.477303	0.232164	0.192802	0.400052	0.574393	0.617373	0.33711	0.266563	0.34017	0.411394	0.428921	0.241273
318	0.207626	0.461011	0.213755	0.163559	0.211849	0.0818678	0.377055	0.581268	0.473049	0.308845	0.256397	0.28311	0.343221	0.174582	0.0191285	0.015383	0.33016	0.334827	0.284506	0.0800529	0.38804	0.479625	0.454242	0.504319	0.253947	0.384897	0.49778	0.60023	0.41402	0.280416	0.24118	0.267821	0.306213	0.319222	0.272343	0.299351	0.455555	0.471276	0.226183	0.185944	0.396505	0.570142	0.609595	0.331581	0.260666	0.328349	0.400652	0.417392	0.231029
320	0.201615	0.448475	0.207732	0.166061	0.209233	0.0786619	0.384905	0.583157	0.476661	0.31117	0.257609	0.283898	0.341015	0.170963	0.0180459	0.0124569	0.322485	0.327053	0.278533	0.0748068	0.389674	0.478427	0.450682	0.495836	0.247867	0.386155	0.49579	0.595469	0.406874	0.272387	0.243525	0.268779	0.305254	0.316158	0.268251	0.299344	0.451928	0.463791	0.221075	0.180136	0.396479	0.568057	0.601392	0.32515	0.254498	0.320734	0.392568	0.40795	0.221533
322	0.198948	0.438667	0.202531	0.170104	0.207426	0.0772575	0.396737	0.588132	0.483273	0.315111	0.259398	0.287154	0.341764	0.168238	0.0158153	0.013017	0.3166	0.323711	0.272343	0.0696932	0.395104	0.479896	0.451727	0.488998	0.241193	0.391965	0.496255	0.593341	0.40116	0.26581	0.248764	0.272889	0.307331	0.314741	0.266496	0.301067	0.452242	0.461356	0.216517	0.176594	0.40038	0.56882	0.59739	0.321761	0.249487	0.315845	0.387208	0.400619	0.213461
324	0.196916	0.429674	0.198037	0.175188	0.206276	0.0742404	0.411621	0.594271	0.492067	0.31768	0.263893	0.292926	0.343137	0.166349	0.0134991	0.0110372	0.316671	0.319467	0.269114	0.0642143	0.402462	0.485799	0.454315	0.484642	0.236597	0.401654	0.499115	0.594075	0.39758	0.260384	0.257195	0.277495	0.309476	0.314217	0.264236	0.306706	0.45238	0.457205	0.212383	0.170866	0.409599	0.573483	0.594694	0.317498	0.244234	0.313095	0.383336	0.39403	0.205415
326	0.196762	0.420607	0.194346	0.183556	0.20554	0.0728624	0.431233	0.604915	0.502938	0.324986	0.267879	0.301952	0.347299	0.165129	0.0119427	0.00861982	0.318255	0.318526	0.265986	0.058687	0.416132	0.494983	0.460086	0.482531	0.233847	0.413751	0.505732	0.597482	0.396645	0.255408	0.267035	0.285158	0.314345	0.31568	0.26374	0.313879	0.457459	0.457046	0.206855	0.166128	0.421921	0.578533	0.594565	0.31402	0.239354	0.315379	0.383252	0.390739	0.199166
328	0.200507	0.414079	0.190369	0.191872	0.206372	0.0714192	0.454382	0.620828	0.51712	0.33281	0.274118	0.313449	0.351912	0.164059	0.00955676	0.0067688	0.323339	0.318593	0.264363	0.0545484	0.433765	0.506512	0.467995	0.481766	0.232962	0.431429	0.515381	0.601779	0.395937	0.251279	0.27974	0.294572	0.320506	0.317307	0.26451	0.325334	0.462865	0.457409	0.203996	0.161343	0.43859	0.588599	0.59546	0.311384	0.235136	0.321833	0.383073	0.387775	0.193288
330	0.20594	0.410166	0.189075	0.203126	0.207055	0.0687616	0.482534	0.638619	0.532925	0.342869	0.281904	0.32826	0.358537	0.164009	0.00690032	0.00464914	0.332548	0.322903	0.263634	0.0477665	0.456001	0.522857	0.478624	0.485107	0.230925	0.452241	0.527682	0.610628	0.395818	0.248912	0.293723	0.306763	0.329172	0.324238	0.26742	0.340712	0.471723	0.460534	0.20069	0.158239	0.459155	0.601362	0.597886	0.308944	0.230947	0.330368	0.387515	0.388422	0.187884
332	0.21285	0.406898	0.186586	0.21572	0.207988	0.0661223	0.512403	0.65985	0.553575	0.355222	0.29212	0.346205	0.367211	0.163898	0.00624783	0.00379372	0.344667	0.328601	0.26684	0.0452333	0.480707	0.544294	0.492491	0.489093	0.232037	0.47704	0.541886	0.621917	0.399178	0.248123	0.312177	0.321089	0.340437	0.330382	0.270744	0.358253	0.482039	0.465327	0.199307	0.155399	0.48474	0.617852	0.605552	0.30944	0.229314	0.343332	0.394076	0.391276	0.184458
334	0.221878	0.405056	0.185801	0.229811	0.211049	0.0665042	0.547337	0.684813	0.577333	0.368739	0.303317	0.36705	0.379215	0.165506	0.00362874	0.0016047	0.359641	0.336642	0.26938	0.0401462	0.510099	0.56769	0.511444	0.496494	0.234327	0.506391	0.561124	0.635159	0.404027	0.247368	0.333423	0.33798	0.352765	0.338726	0.276257	0.378202	0.495961	0.471951	0.197968	0.152957	0.513921	0.636604	0.613178	0.311102	0.228388	0.35875	0.403961	0.395656	0.182278
336	0.233504	0.406778	0.184618	0.244957	0.213896	0.0658981	0.584545	0.713034	0.603471	0.384197	0.315819	0.38934	0.392417	0.168082	0.00159587	-5.04076e-05	0.378381	0.346623	0.2743	0.0366207	0.541754	0.593241	0.531171	0.506944	0.238804	0.537691	0.582567	0.652985	0.410713	0.247217	0.353724	0.356281	0.367194	0.3485	0.282455	0.401349	0.511336	0.480902	0.198574	0.150978	0.54523	0.65948	0.62661	0.313163	0.228989	0.37544	0.415145	0.402194	0.180484
338	0.244286	0.409635	0.186265	0.261972	0.218568	0.0650662	0.624665	0.744122	0.630896	0.401457	0.328825	0.412971	0.406505	0.171924	0.000505276	-0.00113174	0.398553	0.359548	0.281259	0.0345094	0.576699	0.622023	0.551913	0.518595	0.243967	0.572242	0.607113	0.671754	0.418263	0.249836	0.376978	0.375997	0.3829	0.360139	0.289118	0.425757	0.530455	0.492556	0.198432	0.15101	0.580039	0.682886	0.640691	0.318384	0.230045	0.395688	0.428518	0.409465	0.181476
340	0.25745	0.412193	0.186983	0.281832	0.223621	0.0652371	0.668885	0.778571	0.66147	0.421457	0.345707	0.440834	0.422232	0.175478	-0.000728749	-0.00226548	0.421081	0.373529	0.288567	0.0312701	0.614659	0.654912	0.578015	0.532879	0.250211	0.609816	0.632764	0.693807	0.429566	0.254008	0.403841	0.399098	0.399814	0.372959	0.298338	0.45242	0.550476	0.504567	0.201194	0.15093	0.618044	0.711448	0.657698	0.323747	0.232147	0.417247	0.444225	0.420545	0.182855
342	0.273058	0.417786	0.189202	0.301019	0.229353	0.0645111	0.717179	0.817617	0.697777	0.443122	0.362919	0.470736	0.440818	0.180392	-0.00116266	-0.00402505	0.445453	0.389696	0.299311	0.0293848	0.657435	0.690839	0.605636	0.550162	0.258478	0.653608	0.661937	0.718369	0.440692	0.2578	0.431192	0.422977	0.419739	0.388375	0.307963	0.48239	0.57263	0.519872	0.205265	0.152371	0.660392	0.743789	0.678301	0.330601	0.235305	0.444169	0.462664	0.43345	0.184836
344	0.290122	0.423658	0.192243	0.322742	0.237202	0.065404	0.767847	0.859697	0.73422	0.465704	0.381485	0.503721	0.461946	0.186076	-0.0026427	-0.00451711	0.47453	0.408203	0.311526	0.0279695	0.701909	0.730448	0.636574	0.570026	0.268534	0.698119	0.695332	0.746453	0.454539	0.264323	0.462123	0.449936	0.440525	0.404876	0.319428	0.515603	0.597543	0.536502	0.207673	0.153113	0.705997	0.778095	0.699106	0.338675	0.239405	0.470595	0.484086	0.44803	0.18755
346	0.309154	0.432665	0.196927	0.345177	0.245362	0.067067	0.822857	0.905158	0.775961	0.492957	0.403199	0.538157	0.485248	0.193023	-0.0035881	-0.00485014	0.50454	0.42912	0.324764	0.028107	0.751325	0.772205	0.668957	0.5914	0.277828	0.746681	0.731935	0.7779	0.471064	0.270963	0.494932	0.477414	0.463921	0.423424	0.332604	0.550994	0.625484	0.556771	0.212728	0.154578	0.754486	0.816356	0.725434	0.348773	0.245087	0.502028	0.50693	0.464507	0.191968
348	0.329784	0.44276	0.201945	0.370005	0.253181	0.0668446	0.881519	0.955149	0.820183	0.520517	0.42493	0.575988	0.509082	0.200978	-0.00304377	-0.00529583	0.538291	0.452774	0.339652	0.0275856	0.804762	0.818873	0.705372	0.614738	0.289909	0.799682	0.770365	0.810371	0.486672	0.27839	0.530747	0.508839	0.489565	0.442319	0.34592	0.589038	0.655524	0.577765	0.218522	0.158869	0.808119	0.856966	0.753782	0.361362	0.251762	0.535237	0.532854	0.48269	0.196762
350	0.352199	0.45291	0.206516	0.396601	0.262823	0.0684399	0.945624	1.00875	0.86762	0.549752	0.451024	0.617455	0.536359	0.209429	-0.00336972	-0.00600765	0.574103	0.478306	0.356165	0.0274203	0.86075	0.868494	0.742687	0.641284	0.302721	0.856131	0.812598	0.847718	0.506908	0.288108	0.56979	0.543345	0.516422	0.465335	0.36168	0.630166	0.68867	0.600222	0.224572	0.161671	0.865111	0.902033	0.784931	0.373609	0.259758	0.571396	0.559711	0.502753	0.202872
352	0.376921	0.465856	0.213308	0.425659	0.273611	0.0707501	1.01411	1.06876	0.920611	0.583419	0.477677	0.659919	0.566354	0.218822	-0.00350715	-0.00674137	0.613508	0.50568	0.375411	0.027712	0.923098	0.922585	0.787167	0.670799	0.319116	0.919428	0.858526	0.889541	0.527993	0.299111	0.610966	0.578402	0.547134	0.488501	0.378905	0.674706	0.726197	0.627454	0.232383	0.166762	0.927439	0.952637	0.82064	0.388303	0.269192	0.610682	0.591083	0.524865	0.209941
354	0.402912	0.479593	0.219725	0.455912	0.285211	0.0726943	1.08689	1.13016	0.974819	0.617758	0.506756	0.707321	0.597781	0.228795	-0.00379342	-0.00591907	0.65622	0.536023	0.394426	0.0281819	0.988097	0.980237	0.832238	0.701672	0.333486	0.984809	0.907567	0.931357	0.550295	0.30949	0.65555	0.616964	0.57917	0.513827	0.397104	0.722776	0.763947	0.654906	0.239955	0.170588	0.992977	1.00382	0.856237	0.403867	0.278304	0.652353	0.622906	0.549759	0.217533
356	0.430874	0.494547	0.227276	0.489153	0.296621	0.0740921	1.16264	1.19602	1.0353	0.653884	0.536599	0.756848	0.629468	0.239458	-0.00433423	-0.00601766	0.70181	0.568145	0.416582	0.0281206	1.05757	1.04112	0.879271	0.735916	0.351787	1.05399	0.960543	0.977538	0.574936	0.320544	0.701712	0.658355	0.612489	0.54104	0.417479	0.774311	0.803702	0.68297	0.249166	0.175666	1.06285	1.05911	0.895405	0.420103	0.288409	0.69857	0.658075	0.576034	0.227213
358	0.460573	0.511148	0.234939	0.523506	0.310278	0.0755916	1.24414	1.26509	1.09419	0.69206	0.567295	0.811167	0.665021	0.25081	-0.00426858	-0.00627487	0.749988	0.601435	0.438309	0.0285068	1.13085	1.10494	0.930481	0.770435	0.368548	1.12789	1.01486	1.02633	0.600688	0.333804	0.751763	0.701049	0.648122	0.570315	0.436868	0.827851	0.846633	0.714811	0.257754	0.17924	1.13669	1.11811	0.936279	0.436745	0.299135	0.746656	0.695629	0.60369	0.236801
360	0.493059	0.531732	0.245073	0.558245	0.325229	0.0784025	1.32996	1.34101	1.16212	0.735946	0.602417	0.866889	0.704019	0.263407	-0.00452405	-0.00739117	0.803109	0.639761	0.46397	0.0291986	1.20997	1.17554	0.98802	0.812015	0.389239	1.20621	1.07578	1.08072	0.630296	0.349087	0.803786	0.747444	0.687484	0.602833	0.460392	0.885559	0.895059	0.750923	0.268371	0.188262	1.21575	1.18325	0.98465	0.457431	0.312345	0.79926	0.737307	0.634766	0.246867
362	0.527007	0.551211	0.253548	0.597099	0.339672	0.0807663	1.42036	1.4198	1.23126	0.778793	0.639625	0.925962	0.74507	0.277201	-0.00424898	-0.00865562	0.856499	0.678192	0.489581	0.0308274	1.29351	1.24861	1.04585	0.852301	0.410278	1.28863	1.13879	1.1363	0.661228	0.36443	0.857836	0.795709	0.728205	0.634759	0.48463	0.945427	0.943462	0.786415	0.279502	0.193195	1.2999	1.24966	1.03254	0.476986	0.323618	0.853472	0.779189	0.666879	0.258192
364	0.562559	0.57307	0.264175	0.637262	0.355688	0.083915	1.51342	1.50248	1.30295	0.8253	0.676332	0.985846	0.78582	0.290751	-0.00620661	-0.00888497	0.914488	0.718478	0.516868	0.0320744	1.37915	1.32547	1.10715	0.896665	0.432142	1.37394	1.20384	1.19602	0.693289	0.380405	0.915651	0.846058	0.771526	0.670435	0.50935	1.00777	0.996441	0.825138	0.2906	0.200532	1.38583	1.31987	1.08311	0.498378	0.337826	0.911854	0.824223	0.701424	0.271193
366	0.597049	0.596031	0.273681	0.670791	0.371315	0.0866039	1.59146	1.57248	1.36723	0.866286	0.710831	1.04198	0.824574	0.304874	-0.00636535	-0.00959704	0.970732	0.757969	0.543928	0.0323893	1.45504	1.39564	1.16511	0.940821	0.456681	1.45091	1.26286	1.2505	0.726716	0.398225	0.966623	0.891848	0.809526	0.703792	0.53532	1.06555	1.04284	0.862414	0.302945	0.207133	1.4637	1.3838	1.1311	0.520223	0.351995	0.967626	0.867493	0.733819	0.283119
368	0.633732	0.618163	0.283947	0.704786	0.386479	0.0898057	1.66847	1.64287	1.43191	0.908206	0.745348	1.09746	0.863032	0.318307	-0.00589089	-0.00982339	1.02984	0.79755	0.573204	0.0334793	1.53156	1.46721	1.22332	0.987068	0.480538	1.52677	1.32292	1.30687	0.760183	0.415293	1.01584	0.937071	0.849737	0.739314	0.561171	1.12201	1.09192	0.900076	0.314175	0.21422	1.54048	1.44744	1.17988	0.542087	0.365958	1.0257	0.911959	0.768036	0.2953
370	0.671709	0.643926	0.295005	0.744108	0.404357	0.0942425	1.76072	1.72644	1.50558	0.95556	0.784002	1.161	0.90566	0.332641	-0.00628593	-0.0111724	1.08945	0.83859	0.602992	0.0344192	1.61908	1.54647	1.2872	1.03356	0.505488	1.61415	1.391	1.36882	0.795233	0.43359	1.07375	0.989873	0.893511	0.775909	0.587099	1.18675	1.14587	0.940849	0.326812	0.221636	1.6296	1.52042	1.23409	0.564576	0.38098	1.08633	0.959627	0.804313	0.311055
372	0.70999	0.668724	0.306364	0.783882	0.421846	0.0963981	1.85426	1.80962	1.58014	1.00265	0.823929	1.22508	0.950675	0.347746	-0.00593931	-0.0104373	1.15204	0.883751	0.633372	0.0364862	1.70556	1.62784	1.35235	1.08283	0.531093	1.70107	1.45785	1.43203	0.831004	0.452424	1.13147	1.04243	0.938339	0.813275	0.614231	1.25161	1.19981	0.9836	0.340194	0.230506	1.71828	1.59351	1.28931	0.588429	0.396801	1.14854	1.00868	0.842709	0.324594
374	0.748185	0.694334	0.318154	0.823997	0.439114	0.0991568	1.94419	1.89088	1.65374	1.04899	0.862978	1.28671	0.993495	0.364164	-0.00712621	-0.01215	1.21487	0.926742	0.663542	0.0367152	1.79363	1.70529	1.41602	1.13179	0.556406	1.78859	1.52518	1.49388	0.866875	0.470909	1.18882	1.09467	0.983447	0.851377	0.642264	1.31519	1.25414	1.02393	0.353754	0.238791	1.80436	1.66603	1.34453	0.611892	0.411894	1.20973	1.05748	0.87891	0.340076
376	0.788012	0.718943	0.329218	0.863197	0.455578	0.102364	2.03606	1.97374	1.72668	1.096	0.900403	1.34954	1.03667	0.37842	-0.0072255	-0.0128131	1.27588	0.969017	0.692629	0.0384608	1.88114	1.78509	1.48191	1.18145	0.581194	1.8756	1.59288	1.55678	0.902174	0.489458	1.2466	1.1463	1.02593	0.888712	0.669574	1.37974	1.30731	1.06473	0.367331	0.245734	1.89252	1.73921	1.39822	0.636571	0.426507	1.27192	1.10548	0.917173	0.353172
378	0.827964	0.745565	0.339896	0.902503	0.473247	0.106132	2.12683	2.056	1.79902	1.14486	0.940004	1.41311	1.08022	0.39312	-0.00651379	-0.0128345	1.34074	1.01284	0.723598	0.0392044	1.9678	1.86608	1.54709	1.23042	0.608011	1.96347	1.66164	1.61882	0.939067	0.508334	1.3047	1.19805	1.07131	0.925637	0.698287	1.44477	1.36293	1.10673	0.380166	0.254564	1.98124	1.81161	1.45334	0.660036	0.442826	1.33661	1.15478	0.954542	0.368523
380	0.867271	0.770926	0.351526	0.940654	0.490879	0.109053	2.21617	2.13557	1.87141	1.18958	0.978716	1.47509	1.12221	0.409045	-0.00710664	-0.013296	1.40328	1.05587	0.75455	0.0413205	2.0547	1.94411	1.61122	1.27865	0.633268	2.04852	1.72662	1.67973	0.975103	0.527807	1.36119	1.24845	1.11552	0.963885	0.725303	1.50917	1.41485	1.14721	0.392481	0.262556	2.06869	1.88243	1.50662	0.683362	0.457618	1.39873	1.20429	0.990985	0.382431
382	0.905504	0.79621	0.362947	0.978195	0.508361	0.112142	2.30158	2.21391	1.94203	1.23424	1.01583	1.5355	1.16415	0.422408	-0.00793373	-0.0138873	1.46539	1.09941	0.783597	0.04309	2.13851	2.02156	1.67322	1.32688	0.659996	2.13272	1.79248	1.74043	1.01018	0.546876	1.41583	1.29829	1.1567	1.00089	0.752541	1.57142	1.46762	1.1881	0.405802	0.269481	2.15411	1.95183	1.55879	0.705947	0.471747	1.46093	1.25223	1.02813	0.397794
384	0.943715	0.821325	0.373861	1.01421	0.524077	0.115306	2.38276	2.28858	2.00819	1.27809	1.05108	1.59379	1.2044	0.437732	-0.00885486	-0.0143795	1.52605	1.14085	0.812589	0.0445412	2.21915	2.09563	1.7335	1.37321	0.684693	2.21392	1.85507	1.79784	1.04544	0.565208	1.4697	1.34617	1.19851	1.03631	0.778355	1.63145	1.51764	1.22734	0.418359	0.277337	2.23449	2.01977	1.61011	0.728263	0.48677	1.52076	1.29704	1.06444	0.413517
386	0.979843	0.846474	0.383531	1.04883	0.538269	0.118214	2.46284	2.36163	2.07064	1.31833	1.08406	1.65044	1.24259	0.450146	-0.0088219	-0.0157143	1.58336	1.18023	0.840102	0.0461411	2.29537	2.16636	1.79026	1.41739	0.707859	2.29087	1.91436	1.85295	1.07616	0.581029	1.52039	1.39261	1.23726	1.0696	0.80325	1.68932	1.56437	1.26443	0.430511	0.285445	2.31413	2.08255	1.65683	0.748012	0.49991	1.5778	1.34344	1.09837	0.427773
388	1.01392	0.868906	0.393155	1.08282	0.554028	0.120634	2.54112	2.43091	2.13133	1.35575	1.11544	1.70464	1.2771	0.462386	-0.00973398	-0.0157418	1.63699	1.21617	0.864039	0.0475926	2.37035	2.23292	1.84384	1.45745	0.728553	2.36632	1.97124	1.90222	1.10427	0.597363	1.56901	1.43653	1.27364	1.10101	0.825734	1.74415	1.61009	1.29673	0.440946	0.291037	2.38967	2.14308	1.69935	0.766385	0.511796	1.63284	1.38435	1.13144	0.44045
390	1.03748	0.888503	0.40212	1.11755	0.565219	0.124519	2.62705	2.50649	2.19091	1.39102	1.14479	1.75423	1.31064	0.472445	-0.00820141	-0.0149732	1.67698	1.2485	0.881637	0.0482266	2.44236	2.29322	1.88801	1.48788	0.742871	2.43692	2.0271	1.9493	1.12816	0.610334	1.61826	1.47682	1.30698	1.12555	0.845691	1.7954	1.65296	1.32812	0.45187	0.2984	2.46066	2.20082	1.74027	0.783501	0.523074	1.672	1.42006	1.15962	0.449078
392	1.06827	0.90784	0.410599	1.14393	0.577935	0.125819	2.68732	2.56005	2.23628	1.42018	1.16774	1.79898	1.33799	0.482333	-0.00870199	-0.016569	1.72638	1.28014	0.900762	0.0494174	2.50342	2.34767	1.93166	1.52177	0.761737	2.49704	2.07246	1.9895	1.15103	0.623934	1.6581	1.51154	1.33689	1.15029	0.864721	1.84164	1.68892	1.35584	0.460965	0.304736	2.52201	2.2477	1.77582	0.797582	0.532351	1.72043	1.45591	1.18767	0.460413
394	1.09557	0.926443	0.417662	1.1664	0.587374	0.127937	2.73803	2.60569	2.27375	1.44414	1.1882	1.83756	1.36091	0.490238	-0.0097059	-0.0176282	1.76899	1.30726	0.919047	0.0508645	2.55596	2.39473	1.96973	1.55175	0.778708	2.55118	2.11191	2.02382	1.17255	0.635413	1.69212	1.54176	1.36163	1.17259	0.879659	1.88108	1.71863	1.37762	0.468639	0.30935	2.57603	2.28833	1.80495	0.811197	0.541274	1.7643	1.48892	1.21202	0.472153
396	1.11815	0.940359	0.423785	1.18559	0.595885	0.130457	2.77973	2.64322	2.30529	1.46442	1.2048	1.87061	1.38136	0.496737	-0.0103155	-0.0167451	1.80437	1.33055	0.934898	0.0519616	2.6004	2.43364	1.99974	1.57606	0.791997	2.59622	2.14265	2.05134	1.18929	0.645549	1.71948	1.56784	1.38217	1.19119	0.893456	1.91498	1.74455	1.39654	0.476417	0.312701	2.62244	2.32225	1.82876	0.821474	0.547409	1.79998	1.51576	1.23229	0.480579
398	1.13748	0.952809	0.428201	1.20215	0.601813	0.131649	2.81912	2.67634	2.33071	1.47949	1.21832	1.89714	1.39716	0.503199	-0.0103389	-0.0168438	1.83522	1.35065	0.945907	0.0538947	2.63763	2.46571	2.02417	1.59429	0.803398	2.63347	2.17217	2.07197	1.20224	0.654146	1.74312	1.58874	1.39912	1.20442	0.903867	1.94315	1.76468	1.41198	0.48149	0.316888	2.66046	2.34871	1.84737	0.829113	0.553736	1.82948	1.53791	1.25036	0.490648
400	1.15327	0.965323	0.43222	1.21511	0.607191	0.133674	2.84625	2.69945	2.34705	1.48991	1.22557	1.91849	1.40616	0.505867	-0.0092578	-0.0175268	1.86033	1.36502	0.952831	0.0540657	2.66715	2.48999	2.04233	1.60883	0.812611	2.66248	2.19188	2.08796	1.21043	0.658664	1.76194	1.60347	1.41067	1.21445	0.912845	1.96513	1.77947	1.42201	0.486162	0.320504	2.6887	2.36809	1.86077	0.832408	0.556838	1.85482	1.55606	1.26414	0.497152
402	1.16615	0.972289	0.433788	1.22139	0.607921	0.132888	2.86303	2.71167	2.35449	1.49431	1.2289	1.93301	1.41325	0.506531	-0.00942118	-0.0171465	1.88123	1.37591	0.958709	0.0546217	2.68662	2.50478	2.05204	1.61709	0.819057	2.68254	2.20261	2.09304	1.21516	0.663193	1.77341	1.6135	1.41711	1.2206	0.917398	1.98213	1.78717	1.42673	0.488099	0.322096	2.71116	2.37891	1.86429	0.834431	0.559251	1.87622	1.5701	1.27341	0.503941
404	1.17487	0.974944	0.433623	1.22547	0.607595	0.132507	2.87139	2.71419	2.35224	1.49115	1.22703	1.94101	1.41112	0.506429	-0.00905324	-0.0172214	1.89366	1.38185	0.957842	0.0566461	2.6978	2.51022	2.05427	1.61711	0.821628	2.69419	2.20705	2.09084	1.214	0.663621	1.77782	1.61764	1.41844	1.21977	0.917475	1.99172	1.78873	1.42436	0.488175	0.322468	2.72305	2.37877	1.86111	0.831008	0.557204	1.88795	1.57836	1.27839	0.507327
406	1.17804	0.974978	0.433457	1.22283	0.604972	0.131805	2.86728	2.70745	2.34091	1.48321	1.221	1.94023	1.40573	0.504301	-0.00882063	-0.0168772	1.8981	1.38162	0.954456	0.0588419	2.69647	2.50608	2.04747	1.61307	0.821374	2.69193	2.20106	2.08084	1.20765	0.662264	1.7754	1.61324	1.41389	1.21553	0.91465	1.99137	1.78263	1.41817	0.487508	0.321337	2.72099	2.37005	1.8518	0.827689	0.554343	1.89266	1.57832	1.27815	0.509911
408	1.17762	0.970836	0.428486	1.21633	0.600882	0.131538	2.85152	2.68789	2.31818	1.46867	1.20814	1.93184	1.39273	0.499426	-0.0098414	-0.0167815	1.89659	1.37654	0.947046	0.0581792	2.68479	2.49032	2.03207	1.59994	0.816817	2.68215	2.18733	2.06009	1.19723	0.658963	1.76646	1.60342	1.40334	1.20514	0.907959	1.98482	1.76899	1.40441	0.483635	0.31926	2.71143	2.34954	1.83127	0.815958	0.548526	1.89111	1.5739	1.27389	0.509811
410	1.17327	0.96648	0.425455	1.20215	0.593132	0.13078	2.81683	2.65391	2.28416	1.4469	1.18931	1.91398	1.37387	0.492271	-0.00922095	-0.0161763	1.88761	1.36515	0.935744	0.05803	2.65936	2.46429	2.00906	1.58482	0.811356	2.65533	2.16174	2.03267	1.18218	0.652398	1.74711	1.58631	1.38613	1.19073	0.897561	1.96612	1.74741	1.38755	0.478672	0.315823	2.68543	2.3203	1.80521	0.804788	0.541332	1.88362	1.56345	1.26376	0.50993
412	1.16307	0.955629	0.41854	1.1826	0.581238	0.128731	2.77052	2.6071	2.23892	1.41903	1.16668	1.8878	1.34785	0.483101	-0.00834542	-0.0155076	1.86987	1.34854	0.921899	0.0605994	2.62091	2.42517	1.97488	1.55896	0.801197	2.61736	2.12543	1.994	1.16135	0.644186	1.7199	1.56228	1.36121	1.17062	0.883645	1.94044	1.71706	1.36203	0.471211	0.312433	2.6478	2.27822	1.77059	0.789444	0.531731	1.86436	1.54456	1.2477	0.507773
414	1.14784	0.942124	0.410397	1.16086	0.568061	0.126716	2.71673	2.55418	2.18512	1.38235	1.13678	1.85399	1.31837	0.471291	-0.00829703	-0.0148384	1.84488	1.32503	0.902091	0.0596718	2.57405	2.37837	1.93396	1.52846	0.787196	2.57069	2.08325	1.94856	1.13592	0.631955	1.6864	1.53053	1.33319	1.14676	0.865129	1.90612	1.68121	1.33134	0.46239	0.307321	2.60233	2.22956	1.73055	0.769335	0.518528	1.83945	1.52237	1.22922	0.500746
416	1.12808	0.924366	0.399931	1.13069	0.553214	0.122716	2.6504	2.48822	2.12149	1.34134	1.10292	1.81266	1.28095	0.457229	-0.00824206	-0.0154104	1.81123	1.29791	0.878405	0.0589828	2.51683	2.3209	1.88247	1.48901	0.770125	2.51263	2.03179	1.89392	1.10491	0.616422	1.64513	1.49256	1.29718	1.11572	0.84309	1.86495	1.6368	1.29364	0.45195	0.298772	2.54436	2.16946	1.68007	0.745947	0.503882	1.80698	1.4909	1.20424	0.493753
418	1.09746	0.900999	0.388101	1.08634	0.53524	0.119365	2.54011	2.38899	2.03271	1.28689	1.0572	1.74612	1.23181	0.441667	-0.00744479	-0.0144743	1.75873	1.25558	0.849268	0.0601457	2.42247	2.23629	1.81389	1.44172	0.748927	2.41935	1.95631	1.82167	1.06846	0.600384	1.58191	1.43674	1.24794	1.0772	0.815571	1.79807	1.57522	1.24797	0.438186	0.290936	2.45102	2.08743	1.61692	0.719389	0.48779	1.7549	1.4463	1.16788	0.485181
420	1.06259	0.876801	0.374968	1.03915	0.513259	0.11621	2.42626	2.28556	1.94264	1.23033	1.01083	1.67662	1.17973	0.424075	-0.00719737	-0.0131372	1.7022	1.21111	0.819592	0.0595545	2.32575	2.14706	1.74334	1.3918	0.725723	2.32151	1.87745	1.74834	1.02999	0.581896	1.51428	1.37687	1.19773	1.0353	0.786256	1.7297	1.51271	1.1999	0.42288	0.282713	2.35343	2.00004	1.55416	0.691448	0.469535	1.6996	1.39684	1.12959	0.47367
422	1.03537	0.852027	0.362661	1.00192	0.493944	0.112125	2.33887	2.1989	1.86154	1.17717	0.967439	1.62213	1.1325	0.406178	-0.00637483	-0.0137716	1.65672	1.17358	0.787517	0.0586128	2.24776	2.07229	1.67795	1.34257	0.703187	2.24466	1.8086	1.67787	0.989513	0.560722	1.45977	1.3274	1.15266	0.99689	0.757456	1.67387	1.45518	1.15333	0.407964	0.271253	2.27626	1.9232	1.48951	0.661372	0.450596	1.65307	1.35535	1.09512	0.462852
424	1.00387	0.826953	0.348459	0.960284	0.474332	0.107961	2.24069	2.10512	1.77316	1.12146	0.921312	1.56003	1.08116	0.388235	-0.00638782	-0.0123783	1.60416	1.12951	0.754695	0.0573946	2.16012	1.98915	1.60765	1.2891	0.67856	2.15785	1.7333	1.60325	0.948681	0.541577	1.4005	1.27315	1.10323	0.954222	0.726484	1.60994	1.39298	1.10383	0.393023	0.262433	2.18895	1.84026	1.42323	0.631014	0.430196	1.60039	1.31016	1.05797	0.452269
426	0.97046	0.798559	0.333413	0.915131	0.450971	0.102633	2.13579	2.005	1.68124	1.06365	0.87362	1.49317	1.02831	0.370895	-0.00629705	-0.0116102	1.55024	1.08491	0.721137	0.0559975	2.06856	1.90012	1.53482	1.2334	0.6532	2.06614	1.65539	1.52383	0.905078	0.518342	1.33764	1.21545	1.05106	0.909488	0.694861	1.54341	1.32858	1.0514	0.376885	0.251774	2.09635	1.75192	1.35187	0.598912	0.410159	1.54506	1.2604	1.01729	0.438445
428	0.934491	0.768197	0.318099	0.868636	0.430096	0.0990405	2.02458	1.90037	1.58684	1.00291	0.823948	1.42318	0.973439	0.350549	-0.00643253	-0.0112677	1.4897	1.03776	0.686831	0.055397	1.97193	1.80928	1.45755	1.17612	0.625588	1.96826	1.57336	1.44313	0.858772	0.496903	1.26985	1.15541	0.997598	0.86525	0.662768	1.47415	1.2615	0.997855	0.360507	0.241434	1.99812	1.66112	1.28058	0.566926	0.390032	1.48669	1.20879	0.974575	0.425537
430	0.895949	0.737992	0.303602	0.819879	0.40501	0.0947724	1.90997	1.7921	1.48887	0.940569	0.774141	1.34894	0.916847	0.3302	-0.00538164	-0.0101224	1.42693	0.988725	0.650072	0.0546834	1.86815	1.71143	1.37884	1.1157	0.596965	1.86587	1.48689	1.35979	0.814245	0.473251	1.19947	1.09292	0.94226	0.81888	0.627094	1.40025	1.19043	0.941534	0.343209	0.229636	1.8963	1.56528	1.2075	0.533068	0.36698	1.42199	1.15298	0.93111	0.411513
432	0.856992	0.70547	0.287581	0.770959	0.383319	0.090065	1.79527	1.6843	1.39264	0.879826	0.722986	1.27812	0.860741	0.310066	-0.00516576	-0.00989755	1.36278	0.939464	0.615327	0.0529119	1.76576	1.61675	1.3001	1.05799	0.569051	1.76469	1.4018	1.27867	0.767748	0.45109	1.13111	1.02903	0.887735	0.77141	0.594475	1.32559	1.12275	0.888003	0.324186	0.218739	1.79353	1.47381	1.13404	0.500796	0.34716	1.36066	1.09885	0.885893	0.396309
434	0.8167	0.674489	0.27234	0.724492	0.360442	0.0848368	1.68203	1.57892	1.30041	0.821332	0.674243	1.20507	0.806701	0.291845	-0.00551894	-0.00837936	1.29842	0.89043	0.579679	0.052835	1.66511	1.52342	1.22326	1.00066	0.542134	1.6625	1.32026	1.19935	0.724976	0.428106	1.06272	0.96923	0.832754	0.727108	0.560875	1.25273	1.05498	0.834019	0.308945	0.208808	1.69116	1.38274	1.06474	0.469528	0.327304	1.29554	1.04353	0.841802	0.380056
436	0.776627	0.642926	0.256915	0.677211	0.338316	0.0804369	1.57331	1.47661	1.20758	0.762763	0.625922	1.1322	0.752136	0.272345	-0.00558982	-0.00856957	1.23184	0.840109	0.544691	0.0501647	1.56407	1.42921	1.14739	0.940506	0.514345	1.56239	1.2375	1.12129	0.680973	0.404347	0.995804	0.90831	0.780189	0.681957	0.527198	1.179	0.988897	0.781989	0.290518	0.196599	1.59122	1.29327	0.995354	0.437602	0.306567	1.23043	0.988722	0.798104	0.365303
438	0.736641	0.610787	0.241968	0.630057	0.31691	0.0767277	1.45917	1.37201	1.11692	0.705587	0.580254	1.05995	0.698504	0.253472	-0.00537789	-0.00818744	1.16711	0.789897	0.510479	0.0489328	1.46316	1.33608	1.07056	0.8852	0.486191	1.46007	1.15347	1.04366	0.637084	0.382442	0.926356	0.848223	0.72613	0.637394	0.495259	1.10507	0.922435	0.729389	0.274338	0.186308	1.4888	1.20367	0.926144	0.407676	0.285513	1.16403	0.933518	0.752576	0.348875
440	0.696372	0.579582	0.227502	0.584406	0.295389	0.071587	1.34984	1.27064	1.02892	0.649342	0.533633	0.989434	0.64673	0.234868	-0.00458426	-0.00753354	1.10113	0.741926	0.476533	0.046755	1.36274	1.24666	0.996818	0.829032	0.458147	1.3613	1.07421	0.967432	0.595306	0.361185	0.859803	0.788215	0.67508	0.594827	0.462417	1.03262	0.856244	0.679242	0.256397	0.176219	1.38824	1.11743	0.859792	0.377864	0.265689	1.09956	0.878103	0.709292	0.333873
442	0.65777	0.548567	0.212498	0.540282	0.27448	0.0665513	1.2461	1.1738	0.945998	0.597583	0.490616	0.920719	0.598241	0.219516	-0.00385302	-0.00558349	1.03925	0.695793	0.445115	0.046253	1.26854	1.1588	0.926356	0.776419	0.432283	1.26763	0.997709	0.896152	0.554512	0.338936	0.7973	0.730878	0.626574	0.55344	0.43169	0.963374	0.795347	0.631204	0.242065	0.164662	1.29415	1.03495	0.796817	0.35022	0.24723	1.0382	0.826291	0.667534	0.31772
444	0.618162	0.517407	0.198548	0.499259	0.254193	0.0631715	1.14843	1.08092	0.866426	0.547469	0.449178	0.855466	0.55029	0.202714	-0.00420604	-0.00635413	0.976722	0.649718	0.414628	0.0442137	1.17714	1.07502	0.858504	0.721449	0.406756	1.17475	0.922555	0.824963	0.515893	0.316927	0.736309	0.676838	0.577922	0.512311	0.401931	0.896601	0.734694	0.583482	0.225128	0.154532	1.20087	0.954543	0.734393	0.323511	0.230327	0.974237	0.773544	0.624206	0.302089
446	0.580458	0.488664	0.185011	0.456914	0.235746	0.058948	1.05084	0.991778	0.789017	0.499948	0.410259	0.790665	0.505581	0.186412	-0.00406338	-0.00537632	0.915664	0.604662	0.384086	0.0424907	1.08764	0.993357	0.792174	0.671768	0.380753	1.08604	0.852142	0.760668	0.478885	0.296506	0.676285	0.623808	0.532483	0.474238	0.373873	0.831613	0.678035	0.539559	0.211584	0.14566	1.10971	0.878822	0.676799	0.297685	0.212658	0.9142	0.723194	0.585102	0.286589
448	0.544525	0.458036	0.171646	0.418423	0.217263	0.0546254	0.959429	0.907241	0.716713	0.452428	0.371694	0.729738	0.461494	0.171102	-0.00299199	-0.00623928	0.85494	0.56056	0.354249	0.0403347	1.00176	0.914808	0.728678	0.623109	0.354794	1.00067	0.782449	0.696511	0.44106	0.276855	0.620983	0.572572	0.489226	0.437349	0.344181	0.767207	0.623002	0.496268	0.195564	0.135956	1.02346	0.804713	0.620088	0.273486	0.196319	0.852775	0.67352	0.544064	0.269862
450	0.507274	0.429692	0.160044	0.38125	0.199383	0.0518954	0.87119	0.825863	0.648181	0.409731	0.335828	0.670051	0.420763	0.155844	-0.003469	-0.00472752	0.796979	0.518896	0.326448	0.0394768	0.919248	0.839394	0.668306	0.57556	0.329691	0.917195	0.717332	0.63553	0.406137	0.2585	0.566066	0.524824	0.446665	0.401649	0.317549	0.705903	0.569961	0.454754	0.18137	0.125882	0.941159	0.733739	0.566273	0.249047	0.180789	0.795267	0.626042	0.506206	0.253984
452	0.472146	0.401513	0.147577	0.345208	0.182476	0.0477982	0.78841	0.747339	0.582004	0.369408	0.302926	0.61301	0.381523	0.142419	-0.00302904	-0.00394519	0.739983	0.47865	0.300156	0.0372781	0.84032	0.767439	0.610373	0.53019	0.306741	0.837933	0.653557	0.577948	0.37396	0.239008	0.515652	0.477955	0.406342	0.367697	0.29305	0.647981	0.520096	0.415146	0.167573	0.117132	0.861078	0.667352	0.516616	0.226792	0.165743	0.73902	0.579356	0.468185	0.238771
454	0.438371	0.373644	0.136624	0.311678	0.166345	0.0432837	0.708018	0.674071	0.521415	0.329994	0.271483	0.558599	0.343436	0.128412	-0.00291306	-0.00283917	0.684451	0.441125	0.274422	0.0351073	0.764755	0.699942	0.556584	0.487628	0.285125	0.762867	0.594277	0.524081	0.342893	0.221975	0.465388	0.434158	0.368571	0.336623	0.26902	0.591293	0.471768	0.3785	0.154899	0.107705	0.784507	0.604658	0.468122	0.206859	0.151483	0.684815	0.534467	0.432037	0.223502
456	0.405219	0.346516	0.123716	0.280772	0.151347	0.0402243	0.635726	0.607538	0.464501	0.294317	0.242096	0.50788	0.309759	0.116919	-0.00328992	-0.003998	0.632586	0.402643	0.250632	0.0340952	0.694434	0.634581	0.504484	0.446234	0.262579	0.693429	0.537785	0.472628	0.311832	0.203992	0.420744	0.393468	0.33332	0.304023	0.244371	0.538486	0.426793	0.343682	0.141782	0.100772	0.713535	0.544777	0.422187	0.185972	0.137083	0.63061	0.491492	0.398255	0.20948
458	0.376257	0.322629	0.11491	0.251081	0.139063	0.0379741	0.568014	0.54499	0.414455	0.264475	0.21672	0.460929	0.279289	0.106495	-0.00246528	-0.00255717	0.585864	0.371858	0.230394	0.0324167	0.629472	0.577963	0.460577	0.410983	0.245079	0.62888	0.488469	0.429615	0.286984	0.189798	0.37801	0.35536	0.302822	0.279219	0.224682	0.491546	0.387988	0.312837	0.131601	0.0933009	0.648268	0.492822	0.384538	0.170428	0.126775	0.584962	0.454246	0.3681	0.196331
460	0.347318	0.29978	0.106042	0.228447	0.126678	0.0345795	0.511337	0.49156	0.370449	0.235641	0.194344	0.419855	0.251864	0.0965716	-0.00184136	-0.00315721	0.541301	0.341894	0.211403	0.0294776	0.573982	0.526315	0.419271	0.377719	0.226165	0.571697	0.442223	0.389031	0.262235	0.173852	0.343412	0.32255	0.274611	0.254227	0.20688	0.447801	0.352197	0.28568	0.120554	0.0849503	0.590513	0.446865	0.3482	0.153536	0.115809	0.54152	0.418883	0.339223	0.183457
462	0.321605	0.27943	0.0977185	0.20575	0.116055	0.0316618	0.459962	0.444976	0.332463	0.212186	0.174476	0.383455	0.228124	0.0885487	-0.00174041	-0.00252195	0.500633	0.313815	0.19336	0.0289606	0.522098	0.47866	0.382017	0.347312	0.210551	0.521427	0.403056	0.352768	0.24101	0.161182	0.310083	0.293043	0.249127	0.232589	0.18815	0.4102	0.320401	0.259792	0.111427	0.0796018	0.539538	0.405257	0.317198	0.139568	0.105334	0.500297	0.386151	0.313584	0.172357
464	0.297414	0.260161	0.0893439	0.184283	0.105618	0.0295065	0.412869	0.401103	0.296551	0.188241	0.155793	0.34876	0.204348	0.0801425	-0.00173822	-0.00257726	0.462225	0.288106	0.176716	0.0266967	0.473325	0.435682	0.346632	0.318371	0.193148	0.474001	0.364757	0.318814	0.219383	0.1498	0.279675	0.26526	0.225659	0.211073	0.17205	0.37398	0.289629	0.238123	0.103227	0.0736718	0.490081	0.36572	0.287461	0.127332	0.0959868	0.460461	0.354906	0.288978	0.160086
466	0.273719	0.240666	0.0832651	0.165787	0.0966147	0.027588	0.370095	0.360507	0.262429	0.167519	0.13875	0.31636	0.184466	0.0725916	-0.000932961	-0.00143853	0.424242	0.263264	0.160698	0.0253979	0.428854	0.395605	0.315124	0.291269	0.177958	0.428735	0.33131	0.288051	0.201212	0.137348	0.251704	0.240141	0.204047	0.192974	0.157832	0.339885	0.263225	0.214889	0.094058	0.0683153	0.445062	0.331067	0.259865	0.115427	0.088631	0.423999	0.326895	0.265963	0.148549
468	0.253395	0.223079	0.0756366	0.150287	0.0870842	0.0253429	0.332028	0.324209	0.234784	0.150794	0.123603	0.287465	0.166383	0.0657457	-0.00149656	-0.00193946	0.391565	0.241651	0.147404	0.0227924	0.390307	0.358827	0.284988	0.266513	0.16413	0.389628	0.300214	0.260447	0.183006	0.126476	0.227848	0.217363	0.184743	0.175087	0.144097	0.310327	0.239061	0.195235	0.0867835	0.0633385	0.40378	0.298949	0.235303	0.104337	0.0803439	0.389723	0.300036	0.244186	0.138556
470	0.233441	0.205359	0.0691302	0.134448	0.0801315	0.0238223	0.297871	0.29173	0.209453	0.133484	0.109649	0.261688	0.149975	0.0595877	-0.00181039	-0.0020197	0.360026	0.22081	0.134745	0.0234135	0.354924	0.326294	0.259402	0.244909	0.1505	0.353613	0.272226	0.236207	0.167149	0.11672	0.205218	0.197157	0.167252	0.160319	0.131961	0.282475	0.216345	0.178391	0.0794265	0.0581088	0.368034	0.270095	0.211918	0.0931505	0.0740098	0.360454	0.27623	0.223713	0.1288
472	0.214056	0.190568	0.0643972	0.12154	0.0728816	0.0218089	0.267735	0.262956	0.187483	0.120029	0.0983199	0.237796	0.135309	0.0530202	-0.00161644	-0.00152369	0.331772	0.202218	0.122277	0.0206778	0.321748	0.296643	0.235324	0.223922	0.13964	0.321264	0.246414	0.214095	0.152437	0.107275	0.185094	0.179333	0.151849	0.145849	0.121112	0.257058	0.196751	0.16117	0.0739542	0.053693	0.333855	0.245279	0.192547	0.0857162	0.0672254	0.330817	0.253389	0.206656	0.119527
474	0.197327	0.177772	0.0601593	0.109036	0.0665191	0.0200759	0.240855	0.23803	0.167538	0.107424	0.0874014	0.215585	0.121437	0.049401	-0.00209604	-0.00127492	0.305409	0.185423	0.111471	0.0191236	0.292446	0.270143	0.21413	0.205225	0.129135	0.291576	0.22492	0.193485	0.139808	0.0994372	0.166884	0.160936	0.136267	0.13084	0.110585	0.235196	0.178025	0.148228	0.0680718	0.049234	0.303652	0.221044	0.176537	0.0774585	0.062107	0.303266	0.23286	0.191003	0.109859
476	0.180073	0.164501	0.0549533	0.0980853	0.0606857	0.0181074	0.215868	0.21424	0.149908	0.0968326	0.07799	0.196164	0.109597	0.0451557	-0.000964027	-0.00130486	0.279161	0.169232	0.101651	0.0177956	0.264478	0.244347	0.194518	0.187008	0.117413	0.264346	0.202528	0.175768	0.126482	0.0917553	0.150374	0.14625	0.124119	0.119337	0.100801	0.212685	0.161696	0.134747	0.0625092	0.045426	0.274126	0.199728	0.158511	0.0698229	0.0555854	0.278404	0.213729	0.174503	0.101942
478	0.165284	0.152269	0.050656	0.0878594	0.0553715	0.0168102	0.194425	0.193861	0.134172	0.0852218	0.0710121	0.17726	0.100011	0.0404723	-0.000652834	-0.000882099	0.256111	0.154792	0.0931991	0.0163695	0.239978	0.22236	0.176837	0.172087	0.108945	0.238407	0.184653	0.16063	0.117068	0.084332	0.136278	0.131799	0.112158	0.109856	0.0922704	0.193095	0.147848	0.123011	0.0568971	0.0431879	0.249616	0.181875	0.146266	0.0645629	0.0505707	0.255285	0.195796	0.161389	0.0947138
480	0.151785	0.139762	0.0459379	0.0789486	0.0508341	0.0157205	0.174892	0.174504	0.119332	0.076169	0.063452	0.160056	0.0898877	0.0372777	-0.00105917	-0.00138719	0.233017	0.141351	0.0852959	0.0156164	0.217067	0.201745	0.159814	0.156843	0.100175	0.217337	0.166985	0.144442	0.106668	0.0771005	0.121977	0.120495	0.101889	0.100145	0.0842704	0.175539	0.132963	0.110852	0.0536547	0.0384249	0.225792	0.163868	0.131702	0.0586379	0.0469663	0.23283	0.177898	0.147212	0.0873512
482	0.139413	0.127571	0.0422344	0.0715589	0.0469429	0.0141619	0.15727	0.158287	0.107539	0.0685335	0.0567251	0.145543	0.0811679	0.0318863	0.000192147	-0.00185793	0.213444	0.129114	0.0773025	0.0144793	0.197617	0.183317	0.144749	0.143187	0.0905793	0.196702	0.152079	0.132987	0.0973575	0.0709036	0.1114	0.107998	0.0925903	0.0904899	0.0769301	0.159722	0.121795	0.101842	0.0488361	0.0359928	0.204858	0.149206	0.120939	0.0538604	0.0425152	0.213958	0.162729	0.134742	0.0800167
484	0.126246	0.118469	0.0386816	0.0643999	0.0422785	0.0137562	0.141382	0.143655	0.0975734	0.0624872	0.0517143	0.131469	0.0749366	0.0297663	-0.00188969	-0.000819118	0.193711	0.117176	0.0704358	0.0136358	0.178207	0.166344	0.132763	0.130885	0.0824596	0.178005	0.13935	0.11979	0.0898747	0.0659858	0.0998378	0.0977949	0.0846915	0.0829309	0.0698924	0.143957	0.111333	0.0943455	0.0450157	0.0329183	0.185675	0.136003	0.109475	0.0488871	0.0401915	0.1932	0.147912	0.123325	0.0741155
486	0.116085	0.107419	0.035171	0.0582359	0.0387328	0.0119752	0.127521	0.1308	0.0876963	0.0569784	0.0459354	0.120934	0.0669901	0.0269617	-0.00105446	-0.00076419	0.176494	0.105656	0.0641155	0.013277	0.162375	0.151667	0.120363	0.118557	0.0749831	0.160951	0.125144	0.10842	0.08132	0.0593654	0.0899962	0.0898045	0.0762066	0.0752831	0.0644608	0.131458	0.100662	0.0852997	0.0402052	0.0306499	0.168173	0.122105	0.0987032	0.0448924	0.0360827	0.176257	0.135573	0.112581	0.0665474
488	0.105044	0.0994197	0.033663	0.0535114	0.0352375	0.0108043	0.116406	0.11898	0.0787149	0.052058	0.0412015	0.109468	0.0608324	0.0256967	-0.000525076	-0.00062818	0.160178	0.09682	0.0586052	0.0115594	0.146367	0.136414	0.10912	0.109511	0.0686819	0.145628	0.114252	0.0996607	0.0743208	0.0545577	0.0813189	0.0801283	0.0693356	0.0673325	0.0589066	0.11818	0.0923702	0.0786775	0.0378845	0.0294723	0.153318	0.111856	0.090974	0.0421712	0.0321993	0.158895	0.124313	0.10326	0.0612482
490	0.0956108	0.0919059	0.0300133	0.0472666	0.0329056	0.00934195	0.10438	0.108348	0.0721354	0.0466316	0.0380627	0.0979937	0.0549703	0.0233337	-0.00148307	-0.000462236	0.145881	0.0887649	0.0526362	0.0105776	0.13271	0.125024	0.10049	0.100722	0.063018	0.131633	0.10469	0.0916934	0.0686913	0.0498968	0.0729107	0.0727746	0.0634439	0.0630295	0.053518	0.107171	0.0847306	0.0715762	0.0351373	0.0265391	0.138405	0.103418	0.0845028	0.0388539	0.0309141	0.145191	0.112812	0.0948139	0.0568746
492	0.0853679	0.084589	0.0278687	0.043329	0.0303679	0.0100663	0.094438	0.0980515	0.0654904	0.042038	0.0348832	0.0888353	0.0513359	0.0205315	-0.000803753	-0.000596362	0.133098	0.0802354	0.0488824	0.00927468	0.120064	0.112477	0.0904231	0.0922641	0.0574417	0.119967	0.0948687	0.0838521	0.0627043	0.0466262	0.0665658	0.065288	0.0567947	0.0562202	0.0492647	0.0973443	0.0753425	0.0661907	0.0319775	0.0246425	0.125153	0.0935878	0.0773825	0.0358981	0.0277781	0.130875	0.103636	0.085242	0.0524548
494	0.0784932	0.0780509	0.0259336	0.0390684	0.0278085	0.00821477	0.0859529	0.0896633	0.060345	0.0384791	0.0315151	0.0808774	0.0466386	0.0202231	-0.0015973	-0.000332097	0.121161	0.0737394	0.0448848	0.0083053	0.10909	0.103289	0.0829795	0.0847336	0.0539255	0.108096	0.0871513	0.0774927	0.0581737	0.0445838	0.0592104	0.0606191	0.0527148	0.052427	0.0450362	0.0882438	0.0705813	0.0608361	0.0300657	0.0221306	0.113773	0.0854142	0.0716512	0.0324364	0.0269738	0.119768	0.0937854	0.0793542	0.0477951
496	0.0711628	0.0716267	0.0240952	0.035709	0.0252377	0.0086987	0.0788858	0.0822031	0.0555708	0.0354074	0.0281806	0.0738716	0.0425427	0.0176675	0.000570278	4.49365e-05	0.109507	0.06724	0.0400847	0.00871288	0.0985115	0.0934901	0.0744624	0.0780018	0.0481855	0.0983981	0.0806821	0.0710096	0.0525583	0.0406536	0.0551018	0.0548235	0.0489526	0.047216	0.0410409	0.0795701	0.0645939	0.0568663	0.0279783	0.0207963	0.103375	0.0797193	0.065284	0.0298062	0.0240242	0.109199	0.0862465	0.0722339	0.0436981
498	0.0640273	0.0675594	0.0227501	0.0308717	0.0237095	0.00843095	0.0712483	0.0748836	0.0503927	0.0324717	0.0262816	0.0664538	0.0380016	0.0170612	-2.39914e-05	-0.000623759	0.0990605	0.0600231	0.0373382	0.00710049	0.0893865	0.0855044	0.0691713	0.0713998	0.0439239	0.0889799	0.072235	0.06573	0.049725	0.0364914	0.0493678	0.0491671	0.0436046	0.0438704	0.0383313	0.0729684	0.0592434	0.0514756	0.0253954	0.0201488	0.0929051	0.0713089	0.0606288	0.0284372	0.0231729	0.0983358	0.0791526	0.066559	0.0398194
500	0.0578573	0.0603323	0.0194859	0.0288532	0.0211338	0.00732732	0.06451	0.06868	0.0448782	0.0305676	0.022943	0.0596704	0.0355485	0.0148326	-0.000192223	4.72552e-05	0.0890511	0.0546745	0.0343905	0.00709825	0.081051	0.0767653	0.0627402	0.0653326	0.0408221	0.0803012	0.0663674	0.0582691	0.0440396	0.0334507	0.0436188	0.0453565	0.0396485	0.0396592	0.034985	0.066865	0.053862	0.0471407	0.0220227	0.0170957	0.0849837	0.0645769	0.0555317	0.0260395	0.0212038	0.089228	0.0711508	0.0602627	0.0365819
502	0.0528292	0.0554858	0.0183376	0.0264671	0.0202355	0.00666802	0.0582858	0.0631854	0.0418101	0.0268337	0.0226798	0.0544891	0.0319057	0.0149704	-0.000395159	0.00013268	0.0810095	0.0501781	0.0301463	0.00663845	0.0724509	0.0704284	0.055721	0.0584411	0.0361581	0.0731961	0.0597555	0.0547099	0.0413173	0.0304774	0.0397141	0.0410417	0.0367265	0.0363795	0.0321817	0.05942	0.0481392	0.041962	0.0213791	0.0165058	0.0758401	0.0600766	0.0513649	0.0239821	0.0185383	0.0810756	0.065465	0.0557343	0.0332443
504	0.0480157	0.0514857	0.0171214	0.023387	0.0184714	0.00660687	0.0533576	0.0581879	0.0373638	0.0242616	0.0196439	0.0470969	0.0296845	0.0140532	0.00120171	0.000381035	0.0716416	0.0455678	0.0273606	0.00496464	0.0660061	0.0634816	0.0512483	0.0541364	0.033523	0.0654373	0.0548816	0.0505512	0.0379686	0.0283215	0.0353372	0.0362074	0.0324343	0.0332879	0.0296363	0.0521156	0.0446065	0.0401231	0.0199012	0.0157295	0.0687738	0.054098	0.0473627	0.0220864	0.0183112	0.0714514	0.0588	0.0507681	0.0301772
506	0.0423162	0.0481794	0.0154715	0.0213907	0.0171646	0.00581212	0.0480444	0.0532435	0.0353425	0.0222047	0.01812	0.0432993	0.0266468	0.0123538	-0.00104335	0.000425698	0.0655088	0.0404069	0.025206	0.00577706	0.0589743	0.0581619	0.0459904	0.0488594	0.0296412	0.0598603	0.0519399	0.0472675	0.0345962	0.0268084	0.0323616	0.0338034	0.0294826	0.030443	0.0273943	0.0484783	0.0424543	0.0372422	0.0188965	0.0152422	0.0622434	0.0508493	0.0447276	0.0217737	0.0172425	0.0651007	0.0534695	0.0461393	0.0279875
508	0.0382901	0.0446541	0.015854	0.0185922	0.0158484	0.00597829	0.0432679	0.0491262	0.0319126	0.0195662	0.0170916	0.0393175	0.0255747	0.0112973	0.000511582	0.00145132	0.0593367	0.0382072	0.0231757	0.00468665	0.0533514	0.0528359	0.0435442	0.0452672	0.0282228	0.051808	0.046456	0.0432069	0.0309872	0.0243166	0.0290964	0.0303156	0.0273211	0.0282846	0.0245187	0.0439222	0.0377761	0.0348781	0.0169609	0.0140567	0.0551722	0.0458782	0.0405229	0.0200842	0.0157372	0.0589715	0.0489569	0.0422774	0.0266046
510	0.0337467	0.0397387	0.0137396	0.0171606	0.0140452	0.00421677	0.0389305	0.0444978	0.0287646	0.0180038	0.015423	0.0348844	0.0220536	0.0110268	-0.000153253	-0.000266632	0.0524664	0.0339713	0.0213438	0.00439397	0.0485554	0.0469018	0.0390044	0.04112	0.0250039	0.0488102	0.0418477	0.0387788	0.0296957	0.0222497	0.0258292	0.0270562	0.024185	0.0245406	0.0224219	0.0392939	0.0351396	0.0305107	0.0154242	0.0125073	0.0501451	0.0417891	0.0375056	0.017577	0.0144748	0.0518011	0.044059	0.0383514	0.0231969
512	0.0294851	0.036575	0.0118993	0.0146793	0.013072	0.00524175	0.0356226	0.0400345	0.0261042	0.0170163	0.0135231	0.0307532	0.0199117	0.0102118	0.000282462	0.00154178	0.0464666	0.0307549	0.0191442	0.00365598	0.0430545	0.0422818	0.0344148	0.0368332	0.0223582	0.0423698	0.0383486	0.0352963	0.026799	0.0198033	0.0228547	0.0236	0.0222734	0.0234214	0.0209417	0.034169	0.0310872	0.0288955	0.0145072	0.0118931	0.0449781	0.0388724	0.03352	0.0154922	0.0134698	0.0459723	0.0397372	0.0352599	0.0212428
514	0.027339	0.0338973	0.0110392	0.0134528	0.0118677	0.00524729	0.0316072	0.036229	0.0234578	0.0148068	0.0132963	0.0279965	0.0187755	0.00901576	-0.00025777	0.000924819	0.0420615	0.027831	0.0170566	0.00353306	0.0386124	0.0378128	0.0312535	0.0349	0.0196769	0.0376258	0.0337818	0.0341258	0.0253336	0.0190109	0.019595	0.0218676	0.0202386	0.020285	0.0188356	0.0312406	0.0293179	0.0271332	0.0132458	0.011465	0.0400715	0.0347258	0.0319684	0.0165507	0.0124407	0.0419683	0.0354098	0.0328187	0.0193931
516	0.0237775	0.0316969	0.0111682	0.0113813	0.0118013	0.00356132	0.0289682	0.0335356	0.0217455	0.0145714	0.0123269	0.0244083	0.0173067	0.00691474	0.00086226	0.00145501	0.0364815	0.024731	0.015636	0.00444435	0.0335742	0.0333063	0.0285227	0.0322571	0.0186715	0.0334735	0.0317244	0.0306612	0.0234473	0.0167627	0.0180228	0.0196535	0.0183302	0.01955	0.0168487	0.0279766	0.0260645	0.0244338	0.0123951	0.0107801	0.0349285	0.0313724	0.0295008	0.0137129	0.0119863	0.037044	0.032366	0.029137	0.0180725
518	0.0214108	0.0297719	0.0110384	0.0103021	0.0104786	0.00354046	0.0243813	0.0310579	0.0206994	0.0116646	0.00966849	0.0223468	0.0161065	0.00723396	0.000771575	0.000638448	0.0328885	0.022016	0.0139194	0.00387771	0.0311659	0.0309082	0.0262832	0.0286504	0.01738	0.0298004	0.0283689	0.0281975	0.020593	0.0165115	0.0157368	0.016466	0.0170937	0.0168024	0.0167554	0.0248691	0.0238545	0.0227918	0.0132249	0.00985192	0.0318821	0.0292915	0.0268915	0.0139731	0.0119369	0.0319977	0.0290133	0.0267409	0.0169033
520	0.0190472	0.0257681	0.00991414	0.0104237	0.0104678	0.00381329	0.0228017	0.0275185	0.0182325	0.0122869	0.0100138	0.0202254	0.013827	0.0072589	-0.000150531	0.000547079	0.0292038	0.0197053	0.0124484	0.00254804	0.0266459	0.0275095	0.024126	0.0264906	0.0155691	0.0261478	0.0267987	0.0250738	0.0198813	0.01496	0.0136088	0.0153266	0.0156819	0.0153167	0.0137187	0.0216292	0.0218155	0.0212743	0.0112916	0.0101049	0.0280824	0.0261483	0.0248502	0.0122233	0.0112801	0.028601	0.0255395	0.0234401	0.0144127
[truncated: 81 more columns]
